# Supplementary material for: Do sex differences in the prevalence of ECG abnormalities vary across ethnic groups living in the Netherlands? A cross-sectional analysis of the population-based HELIUS study
Source: PubMed Central journal article supplement (PMC7473628; doi:10.1136/bmjopen-2020-039091), 2020-09-03
Supplement: bmjopen-2020-039091.draft_revisions.pdf [file bmjopen-2020-039091.draft_revisions.pdf]

# BMJ Open

BMJ Open is committed to open peer review. As part of this commitment we make the peer review history of every article we publish publicly available.

When an article is published we post the peer reviewers' comments and the authors' responses online. We also post the versions of the paper that were used during peer review. These are the versions that the peer review comments apply to.

The versions of the paper that follow are the versions that were submitted during the peer review process. They are not the versions of record or the final published versions. They should not be cited or distributed as the published version of this manuscript.

BMJ Open is an open access journal and the full, final, typeset and author-corrected version of record of the manuscript is available on our site with no access controls, subscription charges or pay-per-view fees (<http://bmjopen.bmj.com>).

If you have any questions on BMJ Open's open peer review process please email [info.bmjopen@bmj.com](mailto:info.bmjopen@bmj.com)

# BMJ Open

## Sex differences in the prevalence of electrocardiographic abnormalities across ethnic groups: findings from the population-based HELIUS study

|                               |                                                                                                                                                                                                                                                                                                                                                                                                                                                                                                                                                                                                                                        |
|-------------------------------|----------------------------------------------------------------------------------------------------------------------------------------------------------------------------------------------------------------------------------------------------------------------------------------------------------------------------------------------------------------------------------------------------------------------------------------------------------------------------------------------------------------------------------------------------------------------------------------------------------------------------------------|
| Journal:                      | <i>BMJ Open</i>                                                                                                                                                                                                                                                                                                                                                                                                                                                                                                                                                                                                                        |
| Manuscript ID                 | bmjopen-2020-039091                                                                                                                                                                                                                                                                                                                                                                                                                                                                                                                                                                                                                    |
| Article Type:                 | Original research                                                                                                                                                                                                                                                                                                                                                                                                                                                                                                                                                                                                                      |
| Date Submitted by the Author: | 06-Apr-2020                                                                                                                                                                                                                                                                                                                                                                                                                                                                                                                                                                                                                            |
| Complete List of Authors:     | Bolijn, Renee; Amsterdam UMC, Public Health<br>ter Haar, Cato; Amsterdam UMC, Cardiology; Leiden University Medical Center, Cardiology<br>Harskamp, Ralf; Amsterdam UMC, Department of General Practice<br>Tan, Hanno; Amsterdam UMC, Cardiology<br>Kors, Jan; Erasmus Medical Center<br>Postema, Pieter; Amsterdam UMC, Clinical and Experimental Cardiology<br>Snijder, Marieke; Amsterdam UMC, Public Health; Amsterdam UMC, Clinical Epidemiology, Biostatistics and Bioinformatics<br>Peters, Ron; Amsterdam UMC, Cardiology<br>Kunst, Anton; Amsterdam UMC, Public Health<br>van Valkengoed, Irene; Amsterdam UMC, Public Health |
| Keywords:                     | Cardiac Epidemiology < CARDIOLOGY, Pacing & electrophysiology < CARDIOLOGY, EPIDEMIOLOGY, PUBLIC HEALTH                                                                                                                                                                                                                                                                                                                                                                                                                                                                                                                                |
|                               |                                                                                                                                                                                                                                                                                                                                                                                                                                                                                                                                                                                                                                        |

SCHOLARONE™  
Manuscripts

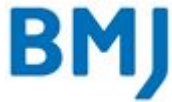

I, the Submitting Author has the right to grant and does grant on behalf of all authors of the Work (as defined in the below author licence), an exclusive licence and/or a non-exclusive licence for contributions from authors who are: i) UK Crown employees; ii) where BMJ has agreed a CC-BY licence shall apply, and/or iii) in accordance with the terms applicable for US Federal Government officers or employees acting as part of their official duties; on a worldwide, perpetual, irrevocable, royalty-free basis to BMJ Publishing Group Ltd ("BMJ") its licensees and where the relevant Journal is co-owned by BMJ to the co-owners of the Journal, to publish the Work in this journal and any other BMJ products and to exploit all rights, as set out in our [licence](#).

The Submitting Author accepts and understands that any supply made under these terms is made by BMJ to the Submitting Author unless you are acting as an employee on behalf of your employer or a postgraduate student of an affiliated institution which is paying any applicable article publishing charge ("APC") for Open Access articles. Where the Submitting Author wishes to make the Work available on an Open Access basis (and intends to pay the relevant APC), the terms of reuse of such Open Access shall be governed by a Creative Commons licence – details of these licences and which [Creative Commons](#) licence will apply to this Work are set out in our licence referred to above.

Other than as permitted in any relevant BMJ Author's Self Archiving Policies, I confirm this Work has not been accepted for publication elsewhere, is not being considered for publication elsewhere and does not duplicate material already published. I confirm all authors consent to publication of this Work and authorise the granting of this licence.

1  
2  
3 **Sex differences in the prevalence of electrocardiographic abnormalities across**  
4  
5  
6 **ethnic groups: findings from the population-based HELIUS study**  
7

8 Renee Bolijn<sup>1</sup>, C. Cato ter Haar<sup>2,3</sup>, Ralf E. Harskamp<sup>4</sup>, Hanno L. Tan<sup>2</sup>, Jan A. Kors<sup>5</sup>, Pieter G. Postema<sup>6</sup>,  
9  
10 Marieke B. Snijder<sup>1,7</sup>, Ron J.G. Peters<sup>2</sup>, Anton E. Kunst<sup>1</sup>, Irene G.M. van Valkengoed<sup>1</sup>  
11  
12  
13  
14

15 <sup>1</sup> *Amsterdam UMC, University of Amsterdam, Department of Public Health, Amsterdam Public Health*  
16 *research institute, Meibergdreef 9, Amsterdam, The Netherlands.*  
17

18 <sup>2</sup> *Amsterdam UMC, University of Amsterdam, Department of Cardiology, Amsterdam Cardiovascular*  
19 *Sciences, Meibergdreef 9, Amsterdam, The Netherlands.*  
20  
21

22 <sup>3</sup> *Leiden University Medical Center, Heart-Lung Center, Department of Cardiology, Leiden, The*  
23 *Netherlands.*  
24  
25

26 <sup>4</sup> *Amsterdam UMC, University of Amsterdam, Department of General Practice, Amsterdam Public*  
27 *Health research institute, Meibergdreef 9, Amsterdam, The Netherlands.*  
28  
29

30 <sup>5</sup> *Department of Medical Informatics, Erasmus University Medical Center, Rotterdam, The*  
31 *Netherlands.*  
32  
33

34 <sup>6</sup> *Amsterdam UMC, University of Amsterdam, Department of Clinical and Experimental Cardiology,*  
35 *Amsterdam Cardiovascular Sciences, Meibergdreef 9, Amsterdam, The Netherlands.*  
36  
37

38 <sup>7</sup> *Amsterdam UMC, University of Amsterdam, Department of Clinical Epidemiology, Biostatistics and*  
39 *Bioinformatics, Amsterdam Public Health research institute, Meibergdreef 9, Amsterdam, The*  
40 *Netherlands*  
41  
42  
43  
44  
45  
46  
47  
48  
49  
50

51 **Corresponding author:** Renee Bolijn, Amsterdam UMC, University of Amsterdam, Department of  
52 Public Health, Meibergdreef 9, 1105 AZ Amsterdam, The Netherlands. E-mail:

53 [r.bolijn@amsterdamumc.nl](mailto:r.bolijn@amsterdamumc.nl). Phone: +31 20 5664649  
54  
55  
56  
57  
58  
59  
60

1  
2  
3  
4  
5  
6  
7  
8  
9  
10  
11  
12  
13  
14  
15  
16  
17  
18  
19  
20  
21  
22  
23  
24  
25  
26  
27  
28  
29  
30  
31  
32  
33  
34  
35  
36  
37  
38  
39  
40  
41  
42  
43  
44  
45  
46  
47  
48  
49  
50  
51  
52  
53  
54  
55  
56  
57  
58  
59  
60

**Word count:** 3392

**Keywords:** ECG abnormalities, sex differences, ethnic minorities, cardiovascular disease prevention, HELIUS study

For peer review only

## ABSTRACT

**Objectives** Major electrocardiographic (ECG) abnormalities have been associated with increased risk of cardiovascular disease (CVD) burden in asymptomatic populations. However, sex differences in occurrence of major ECG abnormalities have been poorly studied, particularly across ethnic groups. The objectives were to investigate 1) sex differences in the prevalence of major and, as a secondary outcome, minor ECG abnormalities, 2) whether patterns of sex differences varied across ethnic groups, by age, and 3) to what extent conventional cardiovascular risk factors contributed to observed sex differences.

**Design** Cross-sectional analysis of population-based study.

**Setting** Multi-ethnic, population-based Healthy Life in an Urban Setting (HELIUS) cohort, Amsterdam, the Netherlands.

**Participants** 8,089 men and 11,369 women of Dutch, South-Asian Surinamese, African Surinamese, Ghanaian, Turkish, and Moroccan origin aged 18-70 years without CVD.

**Outcome measures** Age-adjusted and multivariable logistic regression analyses were performed to study sex differences in prevalence of major and, as secondary outcome, minor ECG abnormalities in the overall population, across ethnic groups, and across age-groups (18-35, 36-50, and >50 years).

**Results** Major and minor ECG abnormalities were less prevalent in women than men (4.6% versus 6.6%, and 23.8% versus 39.8%, respectively). After adjustment for conventional risk factors, sex differences in major abnormalities were smaller in ethnic minority groups (odds ratios [OR] ranged from 0.61 in Moroccans to 1.32 in South-Asian Surinamese) than in the Dutch (OR 0.49; 95% confidence interval [CI] 0.36-0.65). Only in South-Asian Surinamese, women did not have a lower odds than men (OR 1.32; 95% CI 0.96-1.84). The pattern of smaller sex differences in ethnic minority groups was more pronounced in older than in younger age-groups.

1  
2  
3 **Conclusions** The prevalence of major ECG abnormalities was lower in women than men. However, sex  
4  
5 differences were less apparent in ethnic minority groups, particularly in older age-groups. Sex  
6  
7 differences were not explained by conventional risk factors.  
8  
9  
10  
11  
12  
13  
14  
15  
16  
17  
18  
19  
20  
21  
22  
23  
24  
25  
26  
27  
28  
29  
30  
31  
32  
33  
34  
35  
36  
37  
38  
39  
40  
41  
42  
43  
44  
45  
46  
47  
48  
49  
50  
51  
52  
53  
54  
55  
56  
57  
58  
59  
60

For peer review only

## Strengths and limitations of this study

- Participants were sampled from the municipality registry and reflect a general population sample of adults of the major ethnic groups living in Amsterdam.
- Large sample sizes permit the study of sex differences within each ethnic group, including across age strata.
- Single electrocardiographic (ECG) measurements of 10 seconds without additional imaging techniques (e.g., echocardiography) may be suboptimal for the measurement of ECG abnormalities.
- The classification of 'major' and 'minor' ECG abnormalities may depend on criteria used, which may affect reported prevalence estimates.



## INTRODUCTION

The resting electrocardiogram (ECG) is an essential diagnostic instrument in patients with symptoms suggestive of cardiovascular disease (CVD).[1] Previous studies show that the occurrence of major ECG abnormalities is also associated with increased risk of CVD morbidity[2,3] and mortality[3,4] in asymptomatic populations. However, differences in the occurrence of major ECG abnormalities in men and women have been poorly studied. Insights in these sex differences may help to identify subpopulations with a future CVD burden and thus aid targeted (preventive) therapy.

Although studies have described the prevalence of major ECG abnormalities in men and women from diverse populations,[5-11] only three studied sex differences specifically.[5-7] Whether the occurrence of ECG abnormalities differs by sex, independently of cardiovascular risk factors, is a topic of ongoing debate. Two studies suggested that the composite of major ECG abnormalities (e.g., atrial fibrillation, Q-wave or T-wave abnormalities) is more prevalent among men than women,[5,6] while another observed no sex differences.[7]

Differences in the occurrence of ECG abnormalities have been observed between ethnic groups living in similar contexts.[6,8,12,13] However, in Europe, the prevalence of major ECG abnormalities among ethnic minority populations at high risk for CVD, such as men and women of South-Asian origin,[14] is unknown. Additionally, it is unknown to what extent major ECG abnormalities vary between men and women across ethnic groups.

The prevalence of ECG abnormalities tends to increase with increasing age.[5] As larger sex differences in occurrence of CVD have been found in younger age-groups compared to older age-groups,[15] sex differences in prevalence of ECG abnormalities may also vary by age.

1  
2  
3 In this study, we investigated sex differences in the prevalence of major and, as a secondary outcome,  
4 minor ECG abnormalities, in a 18-70 year-old multi-ethnic population living in Amsterdam, the  
5 Netherlands. We assessed whether patterns of sex differences varied across ethnic groups, overall and  
6  
7 by age, and to what extent conventional cardiovascular risk factors contributed to observed sex  
8  
9 differences, overall and within subgroups.  
10  
11  
12  
13  
14  
15  
16  
17  
18  
19  
20  
21  
22  
23  
24  
25  
26  
27  
28  
29  
30  
31  
32  
33  
34  
35  
36  
37  
38  
39  
40  
41  
42  
43  
44  
45  
46  
47  
48  
49  
50  
51  
52  
53  
54  
55  
56  
57  
58  
59  
60

For peer review only

## METHODS

We used baseline data from the HEalthy Life in an Urban Setting (HELIUS) study, a multi-ethnic cohort study conducted in Amsterdam, the Netherlands.[16] Between 2011 and 2015, baseline data were collected among participants of Dutch, South-Asian Surinamese, African Surinamese, Ghanaian, Moroccan, and Turkish origin aged 18-70 years living in Amsterdam. Participants were randomly, stratified by ethnicity, sampled from the municipality registry. Data were obtained by questionnaire and physical examinations (including biological samples). The HELIUS study has been approved by the AMC Ethical Review Board. All participants provided written informed consent.

### ECG measurements

Standard 12-lead ECGs were recorded in supine position with a GE MAC5500 electrocardiograph at 500 samples/sec and analysed using the Modular ECG Analysis System (MEANS).[17] The measurement of ECG abnormalities has been described in detail elsewhere.[18] Briefly, ECG abnormalities were assessed by combining ECG diagnoses of the MEANS programs with Minnesota coding, Marquette 12SL ECG analysis software, and a cardiologist's interpretation. In case of discrepancies, ECGs were double checked. We classified ECG abnormalities into major and minor ECG abnormalities (Appendix Table 1).

### Ethnicity

Ethnicity was defined by the individual's country of birth combined with the parental countries of birth.[19] Surinamese participants were further classified according to self-reported ethnic origin into "African", "South-Asian", "Javanese", or "other".

### Covariables

1  
2  
3 Family history of CVD was defined by a self-reported CVD diagnosis among first degree family members  
4  
5 aged <60 years. Smoking was classified as current, past, or never smoker. For current smokers, the  
6  
7 number of pack-years of smoking was calculated by multiplying the number of packs (containing 20  
8  
9 cigarettes or equivalent rates for cigars and pipe tobacco) smoked a day by the number of years  
10  
11 smoked. Physical activity was defined as achieving  $\geq 30$  minutes of moderate- or high-intensity activity  
12  
13 per day on  $\geq 5$  days per week.[20] Alcohol consumption (on average in the last 12 months) was  
14  
15 classified as: none or low (men: 0-4; women: 0-2 beverages/week), moderate (men: 5-14; women: 3-  
16  
17 7 beverages/week), and high (men: >14; women: >7 beverages/week).  
18  
19  
20  
21  
22

23 Body mass index (BMI) was calculated in duplicate as weight (kg) divided by height squared ( $m^2$ ). Blood  
24  
25 pressure (BP) was measured in duplicate using a validated automated digital BP device (WatchBP  
26  
27 Home; Microlife AG) in a seated position after  $\geq 5$  minutes of rest. Hypertension was defined as systolic  
28  
29 BP  $\geq 140$  mm Hg, diastolic BP  $\geq 90$  mm Hg, use of antihypertensive medication treatment, and/or self-  
30  
31 reported hypertension.  
32  
33  
34  
35  
36

37 Fasting blood samples were drawn to determine creatinine, lipid, and glucose concentrations (details  
38  
39 on these measurements have been described elsewhere).[21] Chronic kidney disease (CKD) risk was  
40  
41 categorized according to the risk of progression of kidney disease based on estimated Glomerular  
42  
43 Filtration Rate and albuminuria levels:[22] (1) low, (2) moderately increased, (3) high and very high  
44  
45 risk. Hypercholesterolemia was defined as total cholesterol  $\geq 5.0$  mmol/l, high-density lipoprotein  
46  
47 cholesterol <1.0 mmol/l (men) or <1.2 mmol/l (women), low-density lipoprotein cholesterol  $\geq 3.0$   
48  
49 mmol/l (Friedewald formula[23]), triglycerides  $\geq 1.7$  mmol/l, use of lipid-lowering medication, and/or  
50  
51 self-reported hypercholesterolemia. Participants were considered to have diabetes in case of a fasting  
52  
53 glucose  $\geq 7.0$  mmol/l, use of glucose-lowering medication and/or if they reported to be diagnosed with  
54  
55 diabetes by a doctor.  
56  
57  
58  
59  
60

## Study population

Baseline data were available for 22,165 participants. We excluded those of Javanese Surinamese (n=233), unknown Surinamese (n=267) origin, and with another/unknown ethnic origin (n=48). Next, we excluded participants with a history of CVD (n=1,610; based on self-reported prior myocardial infarction, cerebrovascular accident (CVA), angioplasty or bypass surgery (on heart or legs), use of antiplatelet drugs (Anatomical Therapeutic Chemical [ATC] code B01AC), use of oral anticoagulants (ATC codes B01AA, B01AE, B01AF), use of antiarrhythmic agents (ATC-codes C01A, C01B, C07AA07, C08D), or paced rhythms). Finally, we excluded participants with missing ECG data (n=337) or with missing data on  $\geq 1$  covariables (n=212), resulting in a study population of 19,458 participants.

## Statistical analyses

Baseline characteristics were expressed as means (standard deviations [SD]) or frequencies (percentages) by sex in the total population and per ethnic group. The age-adjusted prevalence of any major ECG abnormality, any minor ECG abnormality, and a selection of common ECG abnormalities (i.e., major ECG abnormalities with a prevalence of  $\geq 1\%$  and the top 5 most prevalent minor ECG abnormalities) was calculated by sex, in the total population and by ethnicity, using the study population as the standard. For reference, the overall prevalence of less common ECG abnormalities is also provided, but only by sex in the total population. The prevalence of any major ECG abnormalities was also calculated by age-groups (i.e., 18-35, 36-50, and  $>50$  years based on tertiles of the age distribution in the total population) for all ethnic groups.

We performed logistic regression analyses with hierarchal models to examine sex differences in prevalence of any major ECG abnormalities and any minor ECG abnormalities, adjusted for age and ethnicity (model 1), and additionally for hypertension, hypercholesterolemia, diabetes, and smoking

1  
2  
3 status (model 2) to determine to what extent conventional cardiovascular risk factors contributed to  
4  
5 observed differences. We also examined the additional contribution of other well-known  
6  
7 cardiovascular risk factors, i.e., family history of CVD and CKD risk (model 3) and BMI, alcohol  
8  
9 consumption, and physical activity (model 4). To study whether the sex differences varied between  
10  
11 ethnic groups (i.e., effect modification), a statistical interaction term for sex and ethnicity on a  
12  
13 multiplicative scale was added. Then, the main analyses (model 2 with interaction term) for major ECG  
14  
15 abnormalities were repeated stratified by age-groups (18-35, 36-50, and >50 years) to examine the  
16  
17 consistency of sex differences across ethnic groups among age-groups. All statistical analyses were  
18  
19 performed in R studio version 1.1.453.[24]  $p$ -values <0.05 were regarded as statistically significant.  
20  
21  
22  
23  
24

### 25 **Sensitivity analyses**

26  
27 We repeated the main analyses excluding obese participants (BMI >30), since obesity may influence  
28  
29 the accuracy of ECG measurements.[25] Furthermore, use of psychotropic medication may induce  
30  
31 alterations of the ECG resulting in ECG abnormalities (e.g., QT prolongation).[26] Therefore, we  
32  
33 repeated the analyses excluding participants with current use of psychotropic medication. Finally, we  
34  
35 repeated the analyses using number of pack-years of smoking instead of smoking status, to examine  
36  
37 whether the scale of the variables (numeric versus categorical) altered the results.  
38  
39  
40  
41  
42

### 43 **Patient and public involvement**

44  
45 There was no specific patient or public involvement in the development of the research questions,  
46  
47 outcome measures, study design, and recruitment/conduct of the present study. However, for the  
48  
49 core HELIUS study, several supportive measures were taken to enhance the enrolment of ethnic  
50  
51 minority groups. For example, ethnic-specific communication strategies were used, such as working  
52  
53 with faith communities (churches and mosques) and endorsement from local key figures.  
54  
55 Understandability of and time to complete the questionnaire were also enquired among participants.  
56  
57  
58  
59  
60

1  
2  
3 In addition, the present study is part of a larger project on sex and gender differences in CVD risk. As  
4 part of this project, interviews and a short survey on research priority setting according to CVD patients  
5 and persons at increased CVD risk were conducted. The present study aligns with our findings from  
6 these interviews and survey that more research on sex and gender differences in CVD was perceived  
7 as relevant by the target group.  
8  
9  
10  
11  
12  
13  
14  
15  
16  
17  
18  
19  
20  
21  
22  
23  
24  
25  
26  
27  
28  
29  
30  
31  
32  
33  
34  
35  
36  
37  
38  
39  
40  
41  
42  
43  
44  
45  
46  
47  
48  
49  
50  
51  
52  
53  
54  
55  
56  
57  
58  
59  
60

For peer review only

## RESULTS

Mean age was around 43 years (SD 13) in women and 44 years (SD 13) in men (Table 1). More than 20% of both men and women had a family history of CVD. Women were less often current smokers and had fewer mean pack-years of smoking compared to men, while the prevalence of high alcohol consumption was similar among men and women. Women had a higher mean BMI and were less physically active. Hypertension, hypercholesterolemia, and diabetes were less prevalent among women than men, while high CKD risk was equally prevalent among men and women. Women more often used psychotropic medication than men. These patterns in baseline characteristics differed across ethnic groups (Appendix Table 2).

**Table 1.** Baseline characteristics of 19,458 men and women with ECG measurements

|                                        | Men (n=8,089) | Women (n=11,369) |
|----------------------------------------|---------------|------------------|
| Age (years)                            | 43.8 (13.0)   | 43.1 (13.0)      |
| Ethnicity                              |               |                  |
| Dutch                                  | 1,873 (23.2)  | 2,293 (20.2)     |
| South-Asian Surinamese                 | 1,125 (13.9)  | 1,464 (12.9)     |
| African Surinamese                     | 1,411 (17.4)  | 2,266 (19.9)     |
| Ghanaian                               | 822 (10.2)    | 1,321 (11.6)     |
| Turkish                                | 1,451 (17.9)  | 1,769 (15.6)     |
| Moroccan                               | 1,407 (17.4)  | 2,256 (19.8)     |
| Family history of CVD (missing: n=217) | 1,637 (20.4)  | 2,611 (23.3)     |
| Smoker                                 |               |                  |
| Current                                | 2,539 (31.4)  | 2,032 (17.9)     |
| Past                                   | 2,021 (25.0)  | 1,753 (15.4)     |
| Never                                  | 3,529 (43.6)  | 7,584 (66.7)     |
| Pack-years of smoking (missing: n=191) | 5.4 (16.2)    | 1.8 (7.3)        |



|                                                            | Men (n=8,089) | Women (n=11,369) |
|------------------------------------------------------------|---------------|------------------|
| Achieving physical activity norm (missing: n=27)           | 5,020 (62.2)  | 5,963 (52.5)     |
| Alcohol consumption (missing: n=115)                       |               |                  |
| None or low                                                | 5,981 (74.4)  | 8,985 (79.5)     |
| Moderate                                                   | 1,526 (19.0)  | 1,549 (13.7)     |
| High                                                       | 528 (6.6)     | 774 (6.8)        |
| BMI (kg/m <sup>2</sup> ; missing: n=15)                    | 26.3 (4.2)    | 27.5 (5.8)       |
| CKD risk (missing: n=63)                                   |               |                  |
| Low                                                        | 7,684 (95.4)  | 10,689 (94.3)    |
| Moderate                                                   | 304 (3.8)     | 555 (4.9)        |
| High                                                       | 68 (0.8)      | 95 (0.8)         |
| Hypertension                                               | 3,026 (37.4)  | 3,594 (31.6)     |
| Hypercholesterolemia                                       | 5,752 (71.1)  | 7,147 (62.9)     |
| Diabetes                                                   | 829 (10.2)    | 952 (8.4)        |
| Use of psychotropic medication (missing: n=4) <sup>a</sup> | 397 (4.9)     | 679 (6.0)        |

Data are presented as means (standard deviations) or frequencies (percentages).

BMI, body mass index; CKD, chronic kidney disease; CVD, cardiovascular disease.

<sup>a</sup> Anatomical Therapeutic Chemical (ATC) codes: N03AE, N03AF, N03AG, N03AN, N05A, N05BA, N05C, N06A, N06BA, N07B, and R06AD02

Overall, the age-adjusted prevalence of major ECG abnormalities was lower among women (4.6%) compared to men (6.6%; Table 2). In most ethnic groups, women had a lower age-adjusted prevalence (range: 2.9%-6.1%) compared to men (range: 4.7%-7.9%), except in the South-Asian Surinamese (7.2% versus 6.0% respectively). Conventional cardiovascular risk factors and other well-known risk factors did not contribute substantially to the observed sex differences in major ECG abnormalities in the total population and within ethnic groups. For instance, the odds ratio (OR) of having a major ECG abnormality changed from 0.69 (95% confidence interval [CI] 0.61-0.78) to 0.71 (95% CI 0.62-0.81)

1  
2  
3 among women versus men after adjustment for hypertension, hypercholesterolemia, diabetes, and  
4  
5 smoking status, and to 0.67 (95% CI 0.58-0.76) after adjustment for family history of CVD, CKD risk,  
6  
7 BMI, alcohol consumption, and physical activity.  
8  
9

10  
11  
12 There was a general pattern of smaller sex differences in occurrence of major ECG abnormalities in the  
13  
14 ethnic minority groups compared to the Dutch (Table 2). The adjusted OR for women versus men  
15  
16 varied from 0.49 (95% CI 0.36-0.65) in the Dutch to 0.73 (95% CI 0.53-1.01) in Turkish. Only in the  
17  
18 South-Asian Surinamese group, women did not have a lower odds than men (adjusted OR 1.32; 95%  
19  
20 CI 0.96-1.84).  
21  
22  
23  
24  
25  
26  
27  
28  
29  
30  
31  
32  
33  
34  
35  
36  
37  
38  
39  
40  
41  
42  
43  
44  
45  
46  
47  
48  
49  
50  
51  
52  
53  
54  
55  
56  
57  
58  
59  
60

**Table 2.** Number of cases and age-adjusted prevalence of any major ECG abnormality by sex in the total population and by ethnic group, and the odds of major ECG abnormalities in women compared to men, overall and with an interaction term for sex and ethnicity

|                    | Men<br>(n of<br>cases, % <sup>a</sup> ) | Women<br>(n of<br>cases, % <sup>a</sup> ) | Model 1                       |                 |                           |                 | Model 2                       |                 |                           |                 |
|--------------------|-----------------------------------------|-------------------------------------------|-------------------------------|-----------------|---------------------------|-----------------|-------------------------------|-----------------|---------------------------|-----------------|
|                    |                                         |                                           | OR (95% CI)                   | <i>p</i> -value | Ratio of ORs<br>(95% CI)* | <i>p</i> -value | OR (95% CI)                   | <i>p</i> -value | Ratio of ORs<br>(95% CI)* | <i>p</i> -value |
| Overall            | 540 (6.6)                               | 518 (4.6)                                 | 0.69 (0.61-0.78) <sup>b</sup> | <0.001          | NA                        | NA              | 0.71 (0.62-0.81) <sup>b</sup> | <0.001          | NA                        | NA              |
| Dutch              | 137 (7.3)                               | 79 (3.6)                                  | 0.46 (0.34-0.61)              | <0.001          | Reference                 | NA              | 0.49 (0.36-0.65)              | <0.001          | Reference                 | NA              |
| SA Surinamese      | 63 (6.0)                                | 110 (7.2)                                 | 1.24 (0.90-1.72)              | 0.19            | 2.69 (1.75-4.17)          | <0.001          | 1.32 (0.96-1.84)              | 0.09            | 2.72 (1.76-4.21)          | <0.001          |
| African Surinamese | 107 (7.6)                               | 118 (5.3)                                 | 0.68 (0.51-0.89)              | <0.01           | 1.47 (0.99-2.18)          | 0.06            | 0.68 (0.52-0.90)              | <0.01           | 1.40 (0.94-2.09)          | 0.10            |
| Ghanaian           | 72 (7.9)                                | 71 (6.1)                                  | 0.70 (0.49-0.98)              | 0.04            | 1.51 (0.97-2.37)          | 0.07            | 0.71 (0.51-1.01)              | 0.055           | 1.47 (0.94-2.30)          | 0.09            |
| Turkish            | 89 (6.1)                                | 77 (4.4)                                  | 0.71 (0.52-0.98)              | 0.04            | 1.55 (1.01-2.37)          | 0.045           | 0.73 (0.53-1.01)              | 0.058           | 1.51 (0.98-2.32)          | 0.06            |
| Moroccan           | 72 (4.7)                                | 63 (2.9)                                  | 0.59 (0.42-0.84)              | <0.01           | 1.29 (0.82-2.02)          | 0.27            | 0.61 (0.43-0.87)              | <0.01           | 1.26 (0.80-1.99)          | 0.33            |

CI, confidence interval; NA, not applicable; OR, odds ratio; SA, South-Asian.

Significant *p*-values (*p*<0.05) are printed in italic.

Model 1: adjusted for age; model 2: adjusted for age, hypertension, hypercholesterolemia, diabetes, and smoking status

<sup>a</sup> Age-adjusted prevalence.

<sup>b</sup> Additionally adjusted for ethnicity.

\* Measure of effect modification on multiplicative scale (statistical interaction term).

In the total population, the most frequently observed major ECG abnormalities were T-wave abnormalities (1.2%), microvoltages (1.2%), and (ECG suggestive of) cardiomyopathy (1.1%) among women and T-wave abnormalities (1.6%), right bundle branch block (RBBB; 1.4%), and cardiomyopathy (1.1%) among men. Among South-Asian Surinamese women, the only group of women with no lower odds than men, microvoltages (2.9%), cardiomyopathy (1.9%), and T-wave abnormalities (1.5%) were the most prevalent major ECG abnormalities. T-wave abnormalities (1.9%), cardiomyopathy (1.2%), and RBBB (1.1%) were the most prevalent major ECG abnormalities among South-Asian Surinamese men.

As expected, the prevalence of major ECG abnormalities was higher in older than younger age-groups in both men and women (Figure 1). The general pattern of smaller sex differences in the ethnic minority groups compared to the Dutch differed across the age strata (Table 3). In the older age groups, the adjusted sex difference in the odds of having a major ECG abnormality appeared less pronounced in ethnic minorities compared to the Dutch, whereas this sex difference appeared more similar across ethnic group in the youngest age group. Whereas women in all ethnic groups had a lower odds compared to men across all age strata, this was only the case in the youngest age-group of South-Asian Surinamese women versus men.

**Table 3.** The odds of major ECG abnormalities in women compared to men by age-groups, in the total population and with an interaction term for sex and ethnicity

| Aged 18-35 years (n=5870) <sup>a</sup> | OR (95% CI)      | p-value | Ratio of ORs (95% CI)* | p-value |
|----------------------------------------|------------------|---------|------------------------|---------|
| Overall <sup>b</sup>                   | 0.38 (0.27-0.54) | <0.001  | NA                     | NA      |
| Dutch                                  | 0.30 (0.14-0.60) | <0.01   | Reference              | NA      |
| South-Asian Surinamese                 | 0.48 (0.18-1.18) | 0.12    | 1.58 (0.47-5.11)       | 0.45    |
| African Surinamese                     | 0.38 (0.12-1.05) | 0.07    | 1.25 (0.34-4.44)       | 0.73    |

|                                               |                    |                |                               |                |
|-----------------------------------------------|--------------------|----------------|-------------------------------|----------------|
| Ghanaian                                      | 0.48 (0.13-1.77)   | 0.26           | 1.60 (0.37-7.07)              | 0.52           |
| Turkish                                       | 0.55 (0.28-1.09)   | 0.09           | 1.84 (0.69-5.01)              | 0.23           |
| Moroccan                                      | 0.23 (0.09-0.55)   | <0.01          | 0.77 (0.23-2.42)              | 0.65           |
| <b>Aged 36-50 years (n=7099)<sup>a</sup></b>  | <b>OR (95% CI)</b> | <b>p-value</b> | <b>Ratio of ORs (95% CI)*</b> | <b>p-value</b> |
| Overall <sup>b</sup>                          | 0.89 (0.70-1.12)   | 0.32           | NA                            | NA             |
| Dutch                                         | 0.51 (0.28-0.90)   | 0.02           | Reference                     | NA             |
| South-Asian Surinamese                        | 2.61 (1.39-5.20)   | <0.01          | 5.13 (2.19-12.56)             | <0.001         |
| African Surinamese                            | 0.49 (0.29-0.85)   | 0.01           | 0.97 (0.44-2.16)              | 0.94           |
| Ghanaian                                      | 0.91 (0.50-1.71)   | 0.76           | 1.79 (0.78-4.22)              | 0.18           |
| Turkish                                       | 1.04 (0.64-1.69)   | 0.87           | 2.04 (0.97-4.38)              | 0.06           |
| Moroccan                                      | 0.92 (0.51-1.67)   | 0.79           | 1.81 (0.80-4.17)              | 0.16           |
| <b>Aged &gt;50 years (n=6489)<sup>a</sup></b> | <b>OR (95% CI)</b> | <b>p-value</b> | <b>Ratio of ORs (95% CI)*</b> | <b>p-value</b> |
| Overall <sup>b</sup>                          | 0.74 (0.62-0.89)   | <0.01          | NA                            | NA             |
| Dutch                                         | 0.54 (0.37-0.78)   | <0.01          | Reference                     | NA             |
| South-Asian Surinamese                        | 1.22 (0.79-1.91)   | 0.37           | 2.27 (1.28-4.06)              | <0.01          |
| African Surinamese                            | 0.84 (0.59-1.18)   | 0.31           | 1.55 (0.94-2.59)              | 0.09           |
| Ghanaian                                      | 0.74 (0.46-1.17)   | 0.20           | 1.37 (0.75-2.48)              | 0.30           |
| Turkish                                       | 0.55 (0.31-0.96)   | 0.04           | 1.02 (0.51-2.00)              | 0.96           |
| Moroccan                                      | 0.68 (0.40-1.16)   | 0.16           | 1.26 (0.66-2.42)              | 0.49           |

CI, confidence interval; NA, not applicable; OR, odds ratio.

<sup>a</sup> Model adjustment: age, hypertension, hypercholesterolemia, diabetes, and smoking status.

<sup>b</sup> These models were also adjusted for ethnicity.

\* Measure of effect modification on multiplicative scale (statistical interaction term).

Women had a lower prevalence of minor ECG abnormalities (range: 16.2%-35.6%) compared to men (range: 28.5%-55.7%; Appendix Table 3). Sex differences in minor ECG abnormalities were similar across ethnic groups, and were not influenced by conventional risk factors.

1  
2  
3  
4  
5 The prevalence of most common ECG abnormalities was also lower in women than men (Appendix  
6 Table 4a). Only mildly prolonged QTc interval was more prevalent in women than in men. Patterns  
7  
8 were similar across ethnic groups. The prevalence of most less common ECG abnormalities was also  
9  
10 lower in women than women, except for microvoltages, severely prolonged QTc (Bazett) interval, and  
11  
12 left bundle branch block (LBBB), atrial rhythm, and sinus tachycardia (Appendix Table 4b).  
13  
14  
15  
16  
17  
18

19 Sensitivity analyses did not alter our interpretation of findings (data not shown).  
20  
21  
22  
23  
24  
25  
26  
27  
28  
29  
30  
31  
32  
33  
34  
35  
36  
37  
38  
39  
40  
41  
42  
43  
44  
45  
46  
47  
48  
49  
50  
51  
52  
53  
54  
55  
56  
57  
58  
59  
60

## DISCUSSION

In our study, women have an overall lower age-adjusted prevalence of major ECG abnormalities than men. Sex differences in the prevalence of major ECG abnormalities are smaller in the ethnic minority groups than in the Dutch, particularly in older age-groups. Differences in conventional cardiovascular risk factors and other well-known risk factors do not contribute substantially to these sex differences.

Our study has limitations. First, the results may be affected by selection bias due to non-response (response rate: 28%). Non-response analyses showed that women were more likely to participate than men, Turks and Moroccans were less likely to participate compared to other ethnic groups, and participants were slightly older than non-participants.[16] However, we were able to include large numbers of both men and women, each ethnic group, and age-group, indicating sufficient representation of all subgroups. This is relevant because previous work has shown that relative differences in CVD risk factors between ethnic groups are similar to other European countries,[27] suggesting that our results are generalizable to other European countries. Second, the definition of prior CVD was not comprehensive, as data on self-reported prior CVD other than myocardial infarction and CVA were lacking. However, we also excluded participants with a prior angioplasty or bypass surgery (on heart or legs), or paced rhythms, and those participants using antiplatelet drugs, oral anticoagulants, or antiarrhythmic agents, and verified that our results were consistent in analyses restricted to those with a favourable cardiovascular risk profile (post-hoc analysis in participants without hypertension, hypercholesterolemia, diabetes, and those not smoking; data not shown). Therefore, it is unlikely that our results were substantially affected by misclassification. Third, single ECG measurements may have been suboptimal for the measurement of ECG abnormalities, potentially affecting the prevalence estimates. Some common expressions of CVD might not always be detectable by a single ECG measurement of 10 seconds, such as paroxysmal atrial fibrillation, and some ECG abnormalities need additional diagnostic measurements. However, 24-hour ECG monitoring with

1  
2  
3 portable ECG devices and additional imaging techniques (e.g., echocardiography) are often not feasible  
4  
5 in population-based studies. Finally, the classification of 'major' and 'minor' ECG abnormalities  
6  
7 depends on criteria used, and may be variable given the complexity of detailed ECG interpretation. For  
8  
9 instance, the level of severity of some abnormalities may depend on the full clinical assessment or on  
10  
11 combinations of abnormalities (e.g., RBBB with left axis deviation).  
12  
13  
14  
15

16 Similar to previous studies reporting on the prevalence of composite major ECG abnormalities  
17  
18 stratified by sex,[5-8,10,11] we observed an overall lower prevalence of major ECG abnormalities in  
19  
20 women compared to men in most ethnic groups. Prevalence estimates in both men and women were  
21  
22 within the range reported in most previous studies (range: 3.0%-13.2%),[5,6,8,10] except two studies  
23  
24 with higher estimates.[7,11] T-wave abnormalities were the most prevalent major ECG abnormalities  
25  
26 in both men and women in our study and most previous studies.[5-7,10,11] A much larger  
27  
28 heterogeneity has been reported in previous studies in prevalence of minor ECG abnormalities, ranging  
29  
30 from 4.5% to 31.6% in women[5,6,8,9,11] and from 7.3% to 45.7% in men.[5,6,8,9,11] Our prevalence  
31  
32 was higher compared to most studies, most likely due to differences in the classification of major and  
33  
34 minor ECG abnormalities.  
35  
36  
37  
38  
39  
40

41 The observed sex differences in major CG abnormalities are in line with known differences in  
42  
43 cardiovascular pathophysiology and epidemiology of CVD between men and women.[28,29] For  
44  
45 instance, men tend to develop coronary artery disease (CAD) earlier than women, resulting in a higher  
46  
47 incidence of CAD in men compared to women, in particular at a younger age.[28,29] This age-effect is  
48  
49 consistent with our observations across ethnic groups of larger sex differences in prevalence of major  
50  
51 ECG abnormalities in the youngest age-group compared to the older age-groups.  
52  
53  
54  
55  
56  
57  
58  
59  
60



1  
2  
3 Differential patterning of cardiovascular risk factors did not explain the observed sex differences in  
4 prevalence of major ECG abnormalities overall and across ethnic groups. This finding is consistent with  
5 two previous studies on sex differences in ECG abnormalities[5,6] but not with another study.[7] Other  
6 explanations for the relative cardiovascular advantage of women compared to men at a younger age  
7 are still unclear, but may relate to sex hormones, with a prominent role for the protective effects of  
8 estrogen in the development of CVD among premenopausal women.[28] Our findings of larger sex  
9 differences in prevalence of major ECG abnormalities in the youngest age-group compared to the older  
10 age-groups support this hypothesis.  
11  
12  
13  
14  
15  
16  
17  
18  
19  
20  
21  
22

23 We observed that only South-Asian Surinamese women did not have a lower odds of having a major  
24 ECG abnormality compared to South-Asian Surinamese men, which was mainly due to the higher  
25 prevalence of major ECG abnormalities among South-Asian Surinamese women compared to other  
26 women. South-Asian populations living in Europe are already considered a high-risk population for  
27 CVD[14] and our findings may suggest that South-Asian Surinamese women specifically are a target  
28 group for CVD prevention strategies. Although women had a consistently lower odds of having a major  
29 ECG abnormality than men in all other ethnic groups (except South-Asian Surinamese), Dutch women  
30 had a larger cardiovascular advantage than the other women. These findings are in line with a previous  
31 study from the USA showing a larger gap between men and women of the white majority population  
32 compared to black men and women in CAD mortality.[30] In contrast, a Dutch study on sex disparities  
33 in myocardial infarction incidence observed a smaller sex difference in the Dutch majority population  
34 compared to minority populations originating from Morocco, South-Asia, and Turkey.[15] Explanations  
35 for the discrepancy between this and our study are unclear, but may relate to differences in study  
36 populations and exclusion criteria.  
37  
38  
39  
40  
41  
42  
43  
44  
45  
46  
47  
48  
49  
50  
51  
52  
53  
54  
55  
56  
57  
58  
59  
60

1  
2  
3 Differential patterning of cardiovascular risk factors did not explain the smaller cardiovascular  
4 advantage among minority women compared to Dutch women, suggesting that other factors may be  
5 relevant. Psychosocial factors (e.g., discrimination), for instance, may be important risk factors for  
6 major ECG abnormalities in some groups of participants, potentially through stress and lifestyle-  
7 related factors. For instance, an American study found that current and chronic stress were associated  
8 with subclinical atherosclerosis in South-Asian women but not in South-Asian men.[31] Further  
9 research needs to confirm whether these psychosocial factors may also explain ethnic-specific  
10 variation in sex differences in occurrence of major ECG abnormalities.  
11  
12  
13  
14  
15  
16  
17  
18  
19  
20  
21  
22

23 The observed sex differences in occurrence of major ECG abnormalities, overall and within subgroups,  
24 may also reflect that ECG reference values do not differentiate between men and women (except QTc  
25 duration), ethnic groups, or age-groups. Normal values for ECGs may differ for women[32] and non-  
26 white groups[33] compared to white men, in whom the ECG reference criteria were developed. This is  
27 problematic since subgroups with pathological ECGs and potentially related cardiovascular risk might  
28 have been missed, or have a false positive diagnosis. For example, some studies suggest that current  
29 ECG criteria for microvoltages may be less valid for women[34] and Asian populations,[35] which may  
30 have resulted in an overestimation of the occurrence of microvoltages among South-Asian Surinamese  
31 women in our study.  
32  
33  
34  
35  
36  
37  
38  
39  
40  
41  
42  
43  
44

45 Our results have potential implications. We observed sex differences in ECG abnormalities and  
46 identified subpopulations with a relatively high prevalence, e.g., Dutch men, and men and women of  
47 South-Asian and African origin. Moreover, we found that these sex differences occurred irrespective  
48 of conventional risk factors. Previous studies have suggested that ECG measures may be, in addition  
49 to established cardiovascular risk factors, useful for the prediction of future CVD in intermediate and  
50 high-risk groups.[36,37] However, evidence is still limited and potential harms of screening are  
51  
52  
53  
54  
55  
56  
57  
58  
59  
60

1  
2  
3 unknown. Hence, screening for CVD with ECG is currently not recommended.[38] ECG reference values  
4  
5 should be validated in ethnically diverse populations of men and women of different age-groups in  
6  
7 order to further investigate the potentially added value of an ECG to cardiovascular risk classification.  
8  
9  
10  
11  
12  
13  
14  
15  
16  
17  
18  
19  
20  
21  
22  
23  
24  
25  
26  
27  
28  
29  
30  
31  
32  
33  
34  
35  
36  
37  
38  
39  
40  
41  
42  
43  
44  
45  
46  
47  
48  
49  
50  
51  
52  
53  
54  
55  
56  
57  
58  
59  
60

For peer review only

## ACKNOWLEDGEMENTS

We are most grateful to the participants of the HELIUS study and the management team, research nurses, interviewers, research assistants and other staff who have taken part in gathering the data of this study.

## COMPETING INTERESTS

None declared.

## FUNDING

The HELIUS study is conducted by the Academic Medical Center Amsterdam and the Public Health Service of Amsterdam. Both organizations provided core support for HELIUS. The HELIUS study is also funded by the Dutch Heart Foundation, the Netherlands Organization for Health Research and Development (ZonMw), European Union (FP-7), and the European Fund for the Integration of non-EU immigrants (EIF). This work was additionally supported by a grant from the ZonMw Gender and Health Program (grant number 849200008). HLT has received funding from the European Union's Horizon 2020 research and innovation programme under acronym ESCAPE-NET (grant number 733381).

## AUTHORS' CONTRIBUTIONS

RB and IGMvV contributed to the conception and design of the work; CCtH, REH, PGP, and AEK contributed to the design. MBS and RJP contributed to the acquisition of the data; all authors contributed to the analysis and interpretation of the results. RB drafted the manuscript. CCtH, REH, HLT, JAK, PGP, MBS, RJGP, AEK, and IGMvV critically revised the manuscript. All authors gave final approval and agree to be accountable for all aspects of work ensuring integrity and accuracy.

For peer review only

## REFERENCES

- [1] Fye WB. A history of the origin, evolution, and impact of electrocardiography. *Am J Cardiol* 1994;73:937-949.
- [2] Denes P, Larson JC, Lloyd-Jones DM, et al. Major and minor ECG abnormalities in asymptomatic women and risk of cardiovascular events and mortality. *JAMA* 2007;297:978-985.
- [3] Machado DB, Crow RS, Boland LL, et al. Electrocardiographic findings and incident coronary heart disease among participants in the Atherosclerosis Risk in Communities (ARIC) study. *Am J Cardiol* 2006;97:1176-1181.
- [4] De Bacquer D, De Backer G, Kornitzer M, et al. Prognostic value of ECG findings for total, cardiovascular disease, and coronary heart disease death in men and women. *Heart* 1998;80:570-577.
- [5] De Bacquer D, De Backer G and Kornitzer M. Prevalences of ECG findings in large population based samples of men and women. *Heart* 2000;84:625-633.
- [6] Vitelli LL, Crow RS, Shahar E, et al. Electrocardiographic findings in a healthy biracial population. *Am J Cardiol* 1998;81:453-459.
- [7] Prineas RJ, Le A, Soliman EZ, et al. United States national prevalence of electrocardiographic abnormalities in black and white middle-age (45-to 64-year) and older ( $\geq 65$ -year) adults (from the Reasons for Geographic and Racial Differences in Stroke Study). *Am J Cardiol* 2012;109:1223-1228.
- [8] Walsh III JA, Prineas R, Daviglus ML, et al. Prevalence of electrocardiographic abnormalities in a middle-aged, biracial population: Coronary Artery Risk Development in Young Adults study. *J Electrocardiol* 2010;43:385.e1-385.e9.
- [9] Liao YL, Liu KA, Dyer A, et al. Major and minor electrocardiographic abnormalities and risk of death from coronary heart disease, cardiovascular diseases and all causes in men and women. *J Am Coll Cardiol* 1988;12:1494-1500.

- 1  
2  
3 [10] Pinto-Filho MM, Brant LC, Foppa M, et al. Major electrocardiographic abnormalities according to  
4 the Minnesota Coding System among Brazilian adults (from the ELSA-Brasil Cohort Study). *Am J Cardiol*  
5 2017;119:2081-2087.  
6  
7  
8  
9 [11] Wu C-C, Yeh W-T, Crow RS, et al. Comparison of electrocardiographic findings and associated risk  
10 factors between Taiwan Chinese and US White adults. *Int J Cardiol* 2008;128:224-231.  
11  
12  
13 [12] Perez MV, Yaw TS, Myers J, et al. Prognostic value of the computerized ECG in Hispanics. *Clin*  
14 *Cardiol* 2007;30:189-194.  
15  
16  
17 [13] Santhanakrishnan R, Wang N, Larson MG, et al. Racial differences in electrocardiographic  
18 characteristics and prognostic significance in Whites versus Asians. *J Am Heart Assoc* 2016;5:e002956.  
19  
20  
21 [14] Cainzos-Achirica M, Fedeli U, Sattar N, et al. Epidemiology, risk factors, and opportunities for  
22 prevention of cardiovascular disease in individuals of South Asian ethnicity living in Europe.  
23 *Atherosclerosis* 2019;286:105-113.  
24  
25  
26 [15] van Oeffelen AA, Vaartjes I, Stronks K, et al. Sex disparities in acute myocardial infarction  
27 incidence: Do ethnic minority groups differ from the majority population? *Eur J Prev Cardiol*  
28 2015;22:180-188.  
29  
30  
31 [16] Snijder MB, Galenkamp H, Prins M, et al. Cohort profile: the Healthy Life in an Urban Setting  
32 (HELIUS) study in Amsterdam, the Netherlands. *BMJ Open* 2017;7:e017873.  
33  
34  
35 [17] van Bommel J, Kors J and Van Herpen G. Methodology of the modular ECG analysis system MEANS.  
36 *Methods Inf Med* 1990;29:346-353.  
37  
38  
39 [18] ter Haar C, Kors J, Peters R, et al. The prevalence of electrocardiograms exceeding thresholds for  
40 ST-elevation myocardial infarction in apparently healthy individuals: the role of ethnicity. *J Am Heart*  
41 *Assoc* 2020:Accepted for publication.  
42  
43  
44 [19] Stronks K, Kulu-Glasgow I and Agyemang C. The utility of 'country of birth' for the classification of  
45 ethnic groups in health research: the Dutch experience. *Ethn Health* 2009;14:255-269.  
46  
47  
48  
49  
50  
51  
52  
53  
54  
55  
56  
57  
58  
59  
60

- 1  
2  
3 [20] Wendel-Vos GW, Schuit AJ, Saris WH, et al. Reproducibility and relative validity of the short  
4 questionnaire to assess health-enhancing physical activity. *J Clin Epidemiol* 2003;56:1163-1169.  
5  
6  
7 [21] Agyemang C, Snijder MB, Adjei DN, et al. Ethnic disparities in CKD in the Netherlands: the HEalthy  
8 Life in an Urban Setting (HELIUS) study. *Am J Kidney Dis* 2016;67:391-399.  
9  
10  
11 [22] Levin A, Stevens PE, Bilous RW, et al. Kidney Disease: Improving Global Outcomes (KDIGO) CKD  
12 Work Group. KDIGO 2012 clinical practice guideline for the evaluation and management of chronic  
13 kidney disease. *Kidney Int Suppl* 2013;3:1-150.  
14  
15  
16 [23] Friedewald WT, Levy RI and Fredrickson DS. Estimation of the concentration of low-density  
17 lipoprotein cholesterol in plasma, without use of the preparative ultracentrifuge. *Clin Chem*  
18 1972;18:499-502.  
19  
20  
21 [24] RStudio Team. RStudio: Integrated Development for R. Boston, MA: RStudio, Inc., 2016.  
22  
23  
24 [25] Abergel E, Tase M, Menard J, et al. Influence of obesity on the diagnostic value of  
25 electrocardiographic criteria for detecting left ventricular hypertrophy. *Am J Cardiol* 1996;77:739-744.  
26  
27  
28 [26] Vlachos K, Georgopoulos S, Efremidis M, et al. An update on risk factors for drug-induced  
29 arrhythmias. *Expert Rev Clin Pharmacol* 2016;9:117-127.  
30  
31  
32 [27] Agyemang C, Kunst AE, Bhopal R, et al. Brief report: diabetes prevalence in populations of South  
33 Asian Indian and African origins: a comparison of England and The Netherlands. *Epidemiology*  
34 2011;22:563-567.  
35  
36  
37 [28] Regitz-Zagrosek V and Kararigas G. Mechanistic pathways of sex differences in cardiovascular  
38 disease. *Physiol Rev* 2016;97:1-37.  
39  
40  
41 [29] Mosca L, Barrett-Connor E and Kass Wenger N. Sex/gender differences in cardiovascular disease  
42 prevention: what a difference a decade makes. *Circulation* 2011;124:2145-2154.  
43  
44  
45 [30] Ho JE, Paultre F and Mosca L. The gender gap in coronary heart disease mortality: is there a  
46 difference between blacks and whites? *J Womens Health* 2005;14:117-127.  
47  
48  
49  
50  
51  
52  
53  
54  
55  
56  
57  
58  
59  
60



- 1  
2  
3 [31] Shah BM, Shah S, Kandula NR, et al. Psychosocial factors associated with subclinical atherosclerosis  
4 in South Asians: the MASALA study. *J Immigr Minor Health* 2016;18:1317-1327.  
5  
6  
7 [32] Rijnbeek PR, Van Herpen G, Bots ML, et al. Normal values of the electrocardiogram for ages 16-90  
8 years. *J Electrocardiol* 2014;47:914-921.  
9  
10  
11 [33] Macfarlane P, Katibi I, Hamde S, et al. Racial differences in the ECG-selected aspects. *J*  
12 *Electrocardiol* 2014;47:809-814.  
13  
14  
15 [34] Clark E, Devine B and Macfarlane P. Age and sex dependent criteria for lower limits of QRS  
16 voltages. *2006 Computers in Cardiology*. Valencia, Spain: IEEE, 17-20 September 2006, p. 17-20.  
17  
18  
19 [35] Yang T-F and Macfarlane PW. Comparison of the derived vectorcardiogram in apparently healthy  
20 whites and Chinese. *Chest* 1994;106:1014-1020.  
21  
22  
23 [36] Badheka AO, Patel N, Tuliani TA, et al. Electrocardiographic abnormalities and reclassification of  
24 cardiovascular risk: insights from NHANES-III. *Am J Med* 2013;126:319-326.  
25  
26  
27 [37] Auer R, Bauer DC, Marques-Vidal P, et al. Association of major and minor ECG abnormalities with  
28 coronary heart disease events. *JAMA* 2012;307:1497-1505.  
29  
30  
31 [38] Jonas DE, Reddy S, Middleton JC, et al. Screening for cardiovascular disease risk with resting or  
32 exercise electrocardiography: evidence report and systematic review for the US Preventive Services  
33 Task Force. *JAMA* 2018;319:2315-2328.  
34  
35  
36  
37  
38  
39  
40  
41  
42  
43  
44  
45  
46  
47  
48  
49  
50  
51  
52  
53  
54  
55  
56  
57  
58  
59  
60

1  
2  
3 **FIGURE LEGEND**  
4  
5  
6

7 **Figure 1.** Prevalence of any major ECG abnormalities in men and women by age-groups and ethnicity.  
8  
9  
10  
11  
12  
13  
14  
15  
16  
17  
18  
19  
20  
21  
22  
23  
24  
25  
26  
27  
28  
29  
30  
31  
32  
33  
34  
35  
36  
37  
38  
39  
40  
41  
42  
43  
44  
45  
46  
47  
48  
49  
50  
51  
52  
53  
54  
55  
56  
57  
58  
59  
60

For peer review only

1  
2  
3  
4  
5  
6  
7  
8  
9  
10  
11  
12  
13  
14  
15  
16  
17  
18  
19  
20  
21  
22  
23  
24  
25  
26  
27  
28  
29  
30  
31  
32  
33  
34  
35  
36  
37  
38  
39  
40  
41  
42  
43  
44  
45  
46  
47  
48  
49  
50  
51  
52  
53  
54  
55  
56  
57  
58  
59  
60

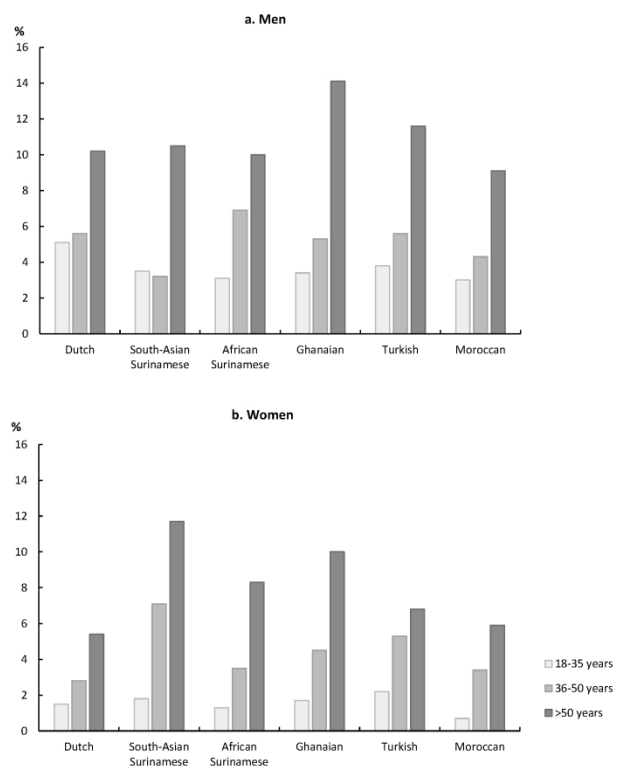

218x309mm (300 x 300 DPI)

**Appendix Table 1.** Classification of major and minor ECG abnormalities

| <b>Major ECG abnormalities</b> |                                                                                                                           |
|--------------------------------|---------------------------------------------------------------------------------------------------------------------------|
|                                | Atrial fibrillation or flutter                                                                                            |
|                                | Ventricular rhythm                                                                                                        |
|                                | Sinus bradycardia + idioventricular rhythm                                                                                |
|                                | 2 <sup>nd</sup> degree atrioventricular conduction disturbances                                                           |
|                                | 3 <sup>rd</sup> degree atrioventricular conduction disturbances                                                           |
|                                | Ventricular preexcitation                                                                                                 |
|                                | Left bundle branch block (LBBB)                                                                                           |
|                                | Right bundle branch block (RBBB)                                                                                          |
|                                | Nonspecific ventricular conduction disturbances (QRS duration $\geq 120$ ms)                                              |
|                                | Severely prolonged QTc (Bazett) interval (men: QTc $> 470$ ms, women: QTc $\geq 480$ ms)                                  |
|                                | Severely shortened QTc (Bazett) interval (men: QTc $< 330$ ms, women: QTc $< 340$ ms)                                     |
|                                | Extreme axis deviation                                                                                                    |
|                                | Pathological Q waves                                                                                                      |
|                                | Microvoltages                                                                                                             |
|                                | T-wave abnormalities                                                                                                      |
|                                | ECG suggestive of cardiomyopathy                                                                                          |
|                                | Miscellaneous (including ECG suggestive of Brugada syndrome)                                                              |
| <b>Minor ECG abnormalities</b> |                                                                                                                           |
|                                | Sinus tachycardia                                                                                                         |
|                                | Sinus bradycardia                                                                                                         |
|                                | Atrial rhythm                                                                                                             |
|                                | Frequent premature atrial contractions (PACs) and/or premature ventricular contractions (PVCs)                            |
|                                | Atrial abnormalities                                                                                                      |
|                                | 1 <sup>st</sup> degree atrioventricular conduction disturbances                                                           |
|                                | Left anterior fascicular block (LAFB)                                                                                     |
|                                | Mild ( $110 \leq \text{QRS} < 120$ ms) ventricular conduction disturbances, including incomplete LBBB and incomplete RBBB |

1  
2  
3 Mildly prolonged QTc (Bazett) interval (men: QTc >450ms, women: QTc ≥460ms)  
4

5 Mildly shortened QTc (Bazett) interval (men: QTc <360ms, women: QTc <370ms)  
6

7 Left axis deviation  
8

9 Right axis deviation  
10

11 Indeterminate heart axis  
12

13 Possible pathological Q waves  
14

15 Left ventricular hypertrophy (LVH)  
16

---

17 ECG, electrocardiogram.  
18  
19  
20  
21  
22  
23  
24  
25  
26  
27  
28  
29  
30  
31  
32  
33  
34  
35  
36  
37  
38  
39  
40  
41  
42  
43  
44  
45  
46  
47  
48  
49  
50  
51  
52  
53  
54  
55  
56  
57  
58  
59  
60

**Appendix Table 2.** Baseline characteristics of 19,548 participants with ECG measurements, by sex and ethnicity

|                                                      | Dutch         |                 | South-Asian Surinamese |                 | African Surinamese |                 |
|------------------------------------------------------|---------------|-----------------|------------------------|-----------------|--------------------|-----------------|
|                                                      | Men (n=1,873) | Women (n=2,293) | Men (n=1,125)          | Women (n=1,464) | Men (n=1,411)      | Women (n=2,266) |
| Age (years)                                          | 45.8 (13.6)   | 44.8 (14.0)     | 42.6 (13.2)            | 45.0 (13.1)     | 47.2 (12.9)        | 47.1 (12.3)     |
| Family history of CVD<br>(missing: n=217*)           | 418 (22.4)    | 536 (23.5)      | 399 (35.8)             | 583 (40.5)      | 231 (16.5)         | 473 (21.2)      |
| Smoker                                               |               |                 |                        |                 |                    |                 |
| Current                                              | 477 (25.5)    | 532 (23.2)      | 432 (38.4)             | 277 (18.9)      | 597 (42.3)         | 548 (24.2)      |
| Past                                                 | 722 (38.5)    | 842 (36.7)      | 177 (15.7)             | 159 (10.9)      | 291 (20.6)         | 400 (17.7)      |
| Never                                                | 674 (36.0)    | 919 (40.1)      | 516 (45.9)             | 1,028 (70.2)    | 523 (37.1)         | 1,318 (58.2)    |
| Pack-years of smoking<br>(missing: n=191*)           | 3.4 (10.6)    | 2.9 (9.7)       | 8.9 (26.9)             | 1.7 (5.9)       | 8.3 (20.3)         | 2.5 (9.8)       |
| Achieving physical activity norm<br>(missing: n=27*) | 1,365 (72.9)  | 1,792 (78.2)    | 645 (57.5)             | 729 (49.9)      | 983 (69.8)         | 1,270 (56.1)    |
| Alcohol consumption<br>(missing: n=115*)             |               |                 |                        |                 |                    |                 |
| None or low                                          | 721 (38.6)    | 774 (33.9)      | 880 (78.6)             | 1,261 (86.7)    | 1,056 (75.6)       | 1,883 (83.7)    |
| Moderate                                             | 884 (47.3)    | 925 (40.5)      | 151 (13.5)             | 149 (10.2)      | 260 (18.6)         | 278 (12.4)      |

|                                          |              |              |              |              |              |              |
|------------------------------------------|--------------|--------------|--------------|--------------|--------------|--------------|
| High                                     | 264 (14.1)   | 587 (25.7)   | 89 (7.9)     | 44 (3.0)     | 80 (5.7)     | 89 (4.0)     |
| BMI (kg/m <sup>2</sup> ; missing: n=15*) | 25.0 (3.7)   | 24.2 (4.3)   | 25.7 (4.1)   | 26.4 (5.2)   | 26.2 (4.3)   | 28.6 (5.9)   |
| CKD risk (missing: n=63*)                |              |              |              |              |              |              |
| Low                                      | 1,804 (96.8) | 2,216 (96.9) | 1,046 (93.2) | 1,365 (93.5) | 1,344 (95.5) | 2,139 (94.6) |
| Moderate                                 | 49 (2.6)     | 64 (2.8)     | 62 (5.5)     | 78 (5.3)     | 53 (3.8)     | 100 (4.4)    |
| High                                     | 10 (0.5)     | 7 (0.3)      | 14 (1.2)     | 17 (1.2)     | 11 (0.8)     | 21 (0.9)     |
| Hypertension                             | 618 (33.0)   | 471 (20.5)   | 429 (38.1)   | 527 (36.0)   | 660 (46.8)   | 1,072 (47.3) |
| Hypercholesterolemia                     | 1,314 (70.2) | 1,374 (59.9) | 934 (83.0)   | 1,120 (76.5) | 889 (63.0)   | 1,447 (63.9) |
| Diabetes                                 | 76 (4.1)     | 40 (1.7)     | 190 (16.9)   | 209 (14.3)   | 149 (10.6)   | 237 (10.5)   |
| Use of psychotropic medication           | 88 (4.7)     | 190 (8.3)    | 57 (5.1)     | 100 (6.8)    | 53 (3.8)     | 105 (4.6)    |
| (missing: n=4*)                          |              |              |              |              |              |              |

|                       | Ghanaian    |                 | Turkish       |                 | Moroccan      |                 |
|-----------------------|-------------|-----------------|---------------|-----------------|---------------|-----------------|
|                       | Men (n=822) | Women (n=1,321) | Men (n=1,451) | Women (n=1,769) | Men (n=1,407) | Women (n=2,256) |
| Age (years)           | 46.3 (11.6) | 43.0 (10.7)     | 39.8 (11.9)   | 39.1 (12.0)     | 41.6 (12.7)   | 39.1 (12.8)     |
| Family history of CVD | 36 (4.4)    | 53 (4.1)        | 382 (26.7)    | 615 (35.2)      | 171 (12.3)    | 351 (15.8)      |
| (missing: n=217*)     |             |                 |               |                 |               |                 |
| Smoker                |             |                 |               |                 |               |                 |
| Current               | 60 (7.3)    | 32 (2.4)        | 602 (41.5)    | 521 (29.5)      | 371 (26.4)    | 122 (5.4)       |

|                                          |            |              |              |              |              |              |
|------------------------------------------|------------|--------------|--------------|--------------|--------------|--------------|
| Past                                     | 102 (12.4) | 66 (5.0)     | 354 (24.4)   | 207 (11.7)   | 375 (26.7)   | 79 (3.5)     |
| Never                                    | 660 (80.3) | 1,223 (92.6) | 495 (34.1)   | 1,041 (58.8) | 661 (47.0)   | 2,055 (91.1) |
| Pack-years of smoking                    | 0.6 (4.2)  | 0.2 (2.3)    | 6.9 (14.8)   | 2.9 (7.2)    | 3.8 (9.9)    | 0.3 (1.9)    |
| (missing: n=191*)                        |            |              |              |              |              |              |
| Achieving physical activity norm         | 516 (62.8) | 626 (47.4)   | 720 (49.8)   | 618 (35.0)   | 791 (56.4)   | 928 (41.2)   |
| (missing: n=27*)                         |            |              |              |              |              |              |
| Alcohol consumption                      |            |              |              |              |              |              |
| (missing: n=115*)                        |            |              |              |              |              |              |
| None or low                              | 711 (87.6) | 1,184 (90.5) | 1,291 (89.8) | 1,679 (95.3) | 1,322 (94.4) | 2,204 (98.0) |
| Moderate                                 | 98 (12.1)  | 103 (7.9)    | 87 (6.1)     | 62 (3.5)     | 46 (3.3)     | 32 (1.4)     |
| High                                     | 3 (0.4)    | 22 (1.7)     | 59 (4.1)     | 20 (1.1)     | 33 (2.4)     | 12 (0.5)     |
| BMI (kg/m <sup>2</sup> ; missing: n=15*) | 26.6 (3.6) | 29.5 (5.3)   | 27.7 (4.4)   | 28.9 (6.5)   | 26.7 (4.0)   | 28.0 (5.7)   |
| CKD risk (missing: n=63*)                |            |              |              |              |              |              |
| Low                                      | 770 (94.2) | 1,213 (92.2) | 1,379 (95.4) | 1,645 (93.3) | 1,341 (95.7) | 2,111 (93.7) |
| Moderate                                 | 37 (4.5)   | 87 (6.6)     | 57 (3.9)     | 106 (6.0)    | 46 (3.3)     | 120 (5.3)    |
| High                                     | 10 (1.2)   | 16 (1.2)     | 9 (0.6)      | 12 (0.7)     | 14 (1.0)     | 22 (1.0)     |
| Hypertension                             | 494 (60.1) | 673 (50.9)   | 427 (29.4)   | 407 (23.0)   | 398 (28.3)   | 444 (19.7)   |
| Hypercholesterolemia                     | 551 (67.0) | 792 (60.0)   | 1,120 (77.2) | 1,130 (63.9) | 944 (67.1)   | 1,284 (56.9) |



1  
2  
3  
4  
5  
6  
7  
8  
9  
10  
11  
12  
13  
14  
15  
16  
17  
18  
19  
20  
21  
22  
23  
24  
25  
26  
27  
28  
29  
30  
31  
32  
33  
34  
35  
36  
37  
38  
39  
40  
41  
42  
43  
44  
45  
46

|                                |            |           |           |           |            |           |
|--------------------------------|------------|-----------|-----------|-----------|------------|-----------|
| Diabetes                       | 115 (14.0) | 110 (8.3) | 138 (9.5) | 134 (7.6) | 161 (11.4) | 222 (9.8) |
| Use of psychotropic medication | 24 (2.9)   | 41 (3.1)  | 88 (6.1)  | 139 (7.9) | 87 (6.2)   | 104 (4.6) |
| (missing: n=4*)                |            |           |           |           |            |           |

---

Data are presented as means (standard deviations) or frequencies (percentages).

BMI, body mass index; CKD, chronic kidney disease; CVD, cardiovascular disease.

\* From total study population (n=19,458).

For peer review only

**Appendix Table 3.** Number of cases and age-adjusted prevalence of any minor ECG abnormality by sex in the total population and by ethnic group, and the odds of minor ECG abnormalities in women compared to men, overall and with an interaction term for sex and ethnicity

|                    | Men<br>(n of<br>cases, % <sup>a</sup> ) | Women<br>(n of<br>cases, % <sup>a</sup> ) | Model 1                       |                 |                           |                 | Model 2                       |                 |                           |                 |
|--------------------|-----------------------------------------|-------------------------------------------|-------------------------------|-----------------|---------------------------|-----------------|-------------------------------|-----------------|---------------------------|-----------------|
|                    |                                         |                                           | OR (95% CI)                   | <i>p</i> -value | Ratio of ORs<br>(95% CI)* | <i>p</i> -value | OR (95% CI)                   | <i>p</i> -value | Ratio of ORs<br>(95% CI)* | <i>p</i> -value |
| Overall            | 3,227<br>(39.8)                         | 2,684<br>(23.8)                           | 0.45 (0.42-0.48) <sup>b</sup> | <0.001          | NA                        | NA              | 0.46 (0.43-0.49) <sup>b</sup> | <0.001          | NA                        | NA              |
| Dutch              | 829 (44.3)                              | 636 (27.6)                                | 0.49 (0.43-0.55)              | <0.001          | Reference                 | NA              | 0.50 (0.44-0.57)              | <0.001          | Reference                 | NA              |
| SA Surinamese      | 316 (28.5)                              | 269 (17.9)                                | 0.56 (0.46-0.67)              | <0.001          | 1.15 (0.92-1.44)          | 0.22            | 0.57 (0.47-0.68)              | <0.001          | 1.13 (0.90-1.42)          | 0.28            |
| African Surinamese | 647 (45.5)                              | 638 (28.4)                                | 0.46 (0.40-0.53)              | <0.001          | 0.95 (0.78-1.15)          | 0.59            | 0.46 (0.40-0.53)              | <0.001          | 0.93 (0.76-1.12)          | 0.43            |
| Ghanaian           | 455 (55.7)                              | 452 (35.6)                                | 0.43 (0.36-0.52)              | <0.001          | 0.89 (0.72-1.11)          | 0.31            | 0.44 (0.36-0.52)              | <0.001          | 0.87 (0.70-1.09)          | 0.22            |
| Turkish            | 468 (32.4)                              | 283 (16.2)                                | 0.40 (0.34-0.48)              | <0.001          | 0.83 (0.67-1.02)          | 0.08            | 0.40 (0.34-0.47)              | <0.001          | 0.80 (0.64-0.99)          | 0.04            |
| Moroccan           | 512 (36.5)                              | 406 (18.3)                                | 0.39 (0.34-0.46)              | <0.001          | 0.81 (0.66-0.99)          | 0.04            | 0.39 (0.34-0.46)              | <0.001          | 0.78 (0.64-0.96)          | 0.02            |

CI, confidence interval; NA, not applicable; OR, odds ratio; SA, South-Asian.

Significant *p*-values (*p*<0.05) are printed in italic.

Model 1: adjusted for age.

Model 2: adjusted for age, hypertension, hypercholesterolemia, diabetes, and smoking status.

<sup>a</sup> Age-adjusted prevalence.

1  
2  
3  
4  
5  
6  
7  
8  
9  
10  
11  
12  
13  
14  
15  
16  
17  
18  
19  
20  
21  
22  
23  
24  
25  
26  
27  
28  
29  
30  
31  
32  
33  
34  
35  
36  
37  
38  
39  
40  
41  
42  
43  
44  
45  
46

<sup>b</sup> Additionally adjusted for ethnicity.

\* Measure of effect modification on multiplicative scale (statistical interaction term).

For peer review only

**Appendix Table 4a.** Age-adjusted prevalence of a selection of common ECG abnormalities (for majors: prevalence  $\geq 1\%$  in total study population; for minors: top 5 of abnormalities with highest prevalence in total study population), shown by major and minor ECG abnormality categories, by sex and ethnicity, ordered by highest to lowest overall prevalence

|                               | Major ECG abnormalities |                                  | Minor ECG abnormalities |                   |                                                                 |                                                       |                                                     |
|-------------------------------|-------------------------|----------------------------------|-------------------------|-------------------|-----------------------------------------------------------------|-------------------------------------------------------|-----------------------------------------------------|
|                               | T-wave abnormalities    | ECG suggestive of cardiomyopathy | LVH                     | Sinus bradycardia | 1 <sup>st</sup> degree atrioventricular conduction disturbances | Mild ventricular conduction disturbances <sup>a</sup> | Mildly prolonged QTc (Bazett) interval <sup>b</sup> |
| <i>All</i>                    |                         |                                  |                         |                   |                                                                 |                                                       |                                                     |
| Men                           | 133 (1.6)               | 90 (1.1)                         | 1,088 (13.5)            | 723 (9.0)         | 532 (6.5)                                                       | 609 (7.5)                                             | 173 (2.1)                                           |
| Women                         | 137 (1.2)               | 124 (1.1)                        | 986 (8.8)               | 473 (4.2)         | 344 (3.1)                                                       | 133 (1.2)                                             | 393 (3.5)                                           |
| <i>Dutch</i>                  |                         |                                  |                         |                   |                                                                 |                                                       |                                                     |
| Men                           | 7 (0.4)                 | 10 (0.5)                         | 181 (9.8)               | 269 (14.3)        | 121 (6.3)                                                       | 254 (13.6)                                            | 57 (3.0)                                            |
| Women                         | 12 (0.5)                | 15 (0.6)                         | 114 (5.0)               | 218 (9.4)         | 72 (3.1)                                                        | 55 (2.4)                                              | 69 (3.1)                                            |
| <i>South-Asian Surinamese</i> |                         |                                  |                         |                   |                                                                 |                                                       |                                                     |
| Men                           | 17 (1.9)                | 13 (1.2)                         | 79 (7.2)                | 78 (6.9)          | 36 (3.4)                                                        | 42 (3.9)                                              | 23 (2.1)                                            |
| Women                         | 23 (1.5)                | 28 (1.9)                         | 100 (6.5)               | 40 (2.8)          | 22 (1.5)                                                        | 3 (0.2)                                               | 56 (3.6)                                            |

1  
2  
3  
4  
5  
6  
7  
8  
9  
10  
11  
12  
13  
14  
15  
16  
17  
18  
19  
20  
21  
22  
23  
24  
25  
26  
27  
28  
29  
30  
31  
32  
33  
34  
35  
36  
37  
38  
39  
40  
41  
42  
43  
44  
45  
46

|                           | Major ECG abnormalities |                                  | Minor ECG abnormalities |                   |                                                                 |                                                       |                                                     |
|---------------------------|-------------------------|----------------------------------|-------------------------|-------------------|-----------------------------------------------------------------|-------------------------------------------------------|-----------------------------------------------------|
|                           | T-wave abnormalities    | ECG suggestive of cardiomyopathy | LVH                     | Sinus bradycardia | 1 <sup>st</sup> degree atrioventricular conduction disturbances | Mild ventricular conduction disturbances <sup>a</sup> | Mildly prolonged QTc (Bazett) interval <sup>b</sup> |
| <i>African Surinamese</i> |                         |                                  |                         |                   |                                                                 |                                                       |                                                     |
| Men                       | 50 (3.5)                | 38 (2.7)                         | 288 (20.3)              | 124 (8.8)         | 137 (9.5)                                                       | 62 (4.3)                                              | 33 (2.3)                                            |
| Women                     | 47 (2.1)                | 41 (1.9)                         | 340 (15.1)              | 63 (2.8)          | 102 (4.5)                                                       | 16 (0.7)                                              | 94 (4.2)                                            |
| <i>Ghanaian</i>           |                         |                                  |                         |                   |                                                                 |                                                       |                                                     |
| Men                       | 40 (4.3)                | 11 (1.2)                         | 293 (35.5)              | 41 (5.4)          | 103 (12.9)                                                      | 22 (2.5)                                              | 9 (1.1)                                             |
| Women                     | 32 (2.7)                | 25 (2.1)                         | 266 (21.3)              | 42 (3.4)          | 79 (6.1)                                                        | 7 (0.6)                                               | 29 (2.5)                                            |
| <i>Turkish</i>            |                         |                                  |                         |                   |                                                                 |                                                       |                                                     |
| Men                       | 13 (0.9)                | 10 (0.7)                         | 87 (6.0)                | 89 (6.2)          | 55 (3.8)                                                        | 118 (8.2)                                             | 37 (2.5)                                            |
| Women                     | 11 (0.7)                | 7 (0.4)                          | 58 (3.3)                | 36 (2.0)          | 23 (1.3)                                                        | 23 (1.4)                                              | 69 (3.9)                                            |
| <i>Moroccan</i>           |                         |                                  |                         |                   |                                                                 |                                                       |                                                     |
| Men                       | 6 (0.4)                 | 8 (0.5)                          | 160 (11.5)              | 122 (9.1)         | 80 (5.3)                                                        | 111 (7.8)                                             | 14 (0.9)                                            |
| Women                     | 12 (0.6)                | 8 (0.4)                          | 108 (4.9)               | 74 (3.2)          | 46 (2.1)                                                        | 29 (1.3)                                              | 76 (3.6)                                            |

Data are reported in n (%). ECG, electrocardiogram.

1  
2  
3 <sup>a</sup> 110≤QRS<120ms; <sup>b</sup> men: QTc >450ms, women: QTc ≥460ms.  
4  
5  
6  
7  
8  
9  
10  
11  
12  
13  
14  
15  
16  
17  
18  
19  
20  
21  
22  
23  
24  
25  
26  
27  
28  
29  
30  
31  
32  
33  
34  
35  
36  
37  
38  
39  
40  
41  
42  
43  
44  
45  
46

For peer review only

**Appendix Table 4b.** Age-adjusted prevalence of less common ECG abnormalities (for majors: prevalence <1% in total study population; for minors: abnormalities not in top 5 with highest prevalence in total study population), shown by major and minor ECG abnormality categories, by sex, ordered by highest to lowest overall prevalence

|                                                              | Men       | Women     |
|--------------------------------------------------------------|-----------|-----------|
| <b>Major ECG abnormalities</b>                               |           |           |
| Microvoltages                                                | 38 (0.5)  | 138 (1.2) |
| Right bundle branch block (RBBB)                             | 117 (1.4) | 38 (0.3)  |
| Severely prolonged QTc (Bazett) interval <sup>a</sup>        | 59 (0.7)  | 91 (0.8)  |
| Nonspecific ventricular conduction disturbances <sup>b</sup> | 87 (1.1)  | 10 (0.1)  |
| Pathological Q waves                                         | 50 (0.6)  | 32 (0.3)  |
| Left bundle branch block (LBBB)                              | 20 (0.2)  | 36 (0.3)  |
| Ventricular preexcitation                                    | 27 (0.3)  | 16 (0.1)  |
| Extreme axis deviation                                       | 15 (0.2)  | 7 (0.06)  |
| Atrial fibrillation or flutter                               | 8 (0.1)   | 5 (0.05)  |
| Miscellaneous <sup>c</sup>                                   | 7 (0.08)  | 2 (0.02)  |
| Severely shortened QTc (Bazett) interval <sup>d</sup>        | 3 (0.04)  | 2 (0.02)  |
| Ventricular rhythm                                           | 2 (0.02)  | 1 (0.01)  |
| 2nd degree atrioventricular conduction disturbances          | 3 (0.04)  | 0         |
| Sinus bradycardia + idioventricular rhythm                   | 2 (0.02)  | 0         |
| 3rd degree atrioventricular conduction disturbances          | 0         | 0         |
| <b>Minor ECG abnormalities</b>                               |           |           |
| Left axis deviation                                          | 371 (4.5) | 207 (1.9) |
| Right axis deviation                                         | 222 (2.8) | 120 (1.1) |
| Possible pathological Q waves                                | 172 (2.1) | 111 (1.0) |
| Frequent PACs and/or PVCs                                    | 99 (1.2)  | 118 (1.1) |
| Atrial rhythm                                                | 79 (1.0)  | 130 (1.1) |
| Mildly shortened QTc (Bazett) interval <sup>e</sup>          | 1.7 (1.4) | 100 (0.9) |

|                                       | <b>Men</b> | <b>Women</b> |
|---------------------------------------|------------|--------------|
| Left anterior fascicular block (LAFB) | 61 (0.7)   | 32 (0.3)     |
| Sinus tachycardia                     | 23 (0.3)   | 37 (0.3)     |
| Atrial abnormalities                  | 32 (0.4)   | 27 (0.2)     |
| Indeterminate heart axis              | 9 (0.1)    | 4 (0.03)     |

Data are reported in n (%).

ECG, electrocardiogram; PAC, premature atrial contraction; PVC, premature ventricular contraction.

<sup>a</sup> men: QTc >470ms, women: QTc ≥480ms;

<sup>b</sup> QRS duration ≥120ms.

<sup>c</sup> Including ECG suggestive of Brugada syndrome.

<sup>d</sup> men: QTc <330ms, women: QTc <340ms.

<sup>e</sup> men: QTc <360ms, women: QTc <370ms



**STROBE 2007 (v4) Statement—Checklist of items that should be included in reports of *cross-sectional studies***

| Section/Topic                | Item # | Recommendation                                                                                                                                                                       | Reported on page # |
|------------------------------|--------|--------------------------------------------------------------------------------------------------------------------------------------------------------------------------------------|--------------------|
| <b>Title and abstract</b>    | 1      | (a) Indicate the study's design with a commonly used term in the title or the abstract                                                                                               | 1                  |
|                              |        | (b) Provide in the abstract an informative and balanced summary of what was done and what was found                                                                                  | 2, 3               |
| <b>Introduction</b>          |        |                                                                                                                                                                                      |                    |
| Background/rationale         | 2      | Explain the scientific background and rationale for the investigation being reported                                                                                                 | 6                  |
| Objectives                   | 3      | State specific objectives, including any prespecified hypotheses                                                                                                                     | 7                  |
| <b>Methods</b>               |        |                                                                                                                                                                                      |                    |
| Study design                 | 4      | Present key elements of study design early in the paper                                                                                                                              | 8                  |
| Setting                      | 5      | Describe the setting, locations, and relevant dates, including periods of recruitment, exposure, follow-up, and data collection                                                      | 8                  |
| Participants                 | 6      | (a) Give the eligibility criteria, and the sources and methods of selection of participants                                                                                          | 8, 10              |
| Variables                    | 7      | Clearly define all outcomes, exposures, predictors, potential confounders, and effect modifiers. Give diagnostic criteria, if applicable                                             | 8, 9               |
| Data sources/<br>measurement | 8*     | For each variable of interest, give sources of data and details of methods of assessment (measurement). Describe comparability of assessment methods if there is more than one group | 8, 9               |
| Bias                         | 9      | Describe any efforts to address potential sources of bias                                                                                                                            | 8, 10, 11          |
| Study size                   | 10     | Explain how the study size was arrived at                                                                                                                                            | 10                 |
| Quantitative variables       | 11     | Explain how quantitative variables were handled in the analyses. If applicable, describe which groupings were chosen and why                                                         | 8-11               |
| Statistical methods          | 12     | (a) Describe all statistical methods, including those used to control for confounding                                                                                                | 10, 11             |
|                              |        | (b) Describe any methods used to examine subgroups and interactions                                                                                                                  | 10, 11             |
|                              |        | (c) Explain how missing data were addressed                                                                                                                                          | 10                 |
|                              |        | (d) If applicable, describe analytical methods taking account of sampling strategy                                                                                                   | NA                 |
|                              |        | (e) Describe any sensitivity analyses                                                                                                                                                | 11                 |
| <b>Results</b>               |        |                                                                                                                                                                                      |                    |

|                          |     |                                                                                                                                                                                                              |                                        |
|--------------------------|-----|--------------------------------------------------------------------------------------------------------------------------------------------------------------------------------------------------------------|----------------------------------------|
| Participants             | 13* | (a) Report numbers of individuals at each stage of study—eg numbers potentially eligible, examined for eligibility, confirmed eligible, included in the study, completing follow-up, and analysed            | 10                                     |
|                          |     | (b) Give reasons for non-participation at each stage                                                                                                                                                         | NA                                     |
|                          |     | (c) Consider use of a flow diagram                                                                                                                                                                           |                                        |
| Descriptive data         | 14* | (a) Give characteristics of study participants (eg demographic, clinical, social) and information on exposures and potential confounders                                                                     | 13                                     |
|                          |     | (b) Indicate number of participants with missing data for each variable of interest                                                                                                                          | 13, 14                                 |
| Outcome data             | 15* | Report numbers of outcome events or summary measures                                                                                                                                                         | 14, 16-19                              |
| Main results             | 16  | (a) Give unadjusted estimates and, if applicable, confounder-adjusted estimates and their precision (eg, 95% confidence interval). Make clear which confounders were adjusted for and why they were included | Table 2, Table 3, and Appendix Table 3 |
|                          |     | (b) Report category boundaries when continuous variables were categorized                                                                                                                                    | 17, 18                                 |
|                          |     | (c) If relevant, consider translating estimates of relative risk into absolute risk for a meaningful time period                                                                                             | NA                                     |
| Other analyses           | 17  | Report other analyses done—eg analyses of subgroups and interactions, and sensitivity analyses                                                                                                               | 15-19                                  |
| <b>Discussion</b>        |     |                                                                                                                                                                                                              |                                        |
| Key results              | 18  | Summarise key results with reference to study objectives                                                                                                                                                     | 20                                     |
| Limitations              | 19  | Discuss limitations of the study, taking into account sources of potential bias or imprecision. Discuss both direction and magnitude of any potential bias                                                   | 20, 21                                 |
| Interpretation           | 20  | Give a cautious overall interpretation of results considering objectives, limitations, multiplicity of analyses, results from similar studies, and other relevant evidence                                   | 21-24                                  |
| Generalisability         | 21  | Discuss the generalisability (external validity) of the study results                                                                                                                                        | 20                                     |
| <b>Other information</b> |     |                                                                                                                                                                                                              |                                        |
| Funding                  | 22  | Give the source of funding and the role of the funders for the present study and, if applicable, for the original study on which the present article is based                                                | 25                                     |

\*Give information separately for cases and controls in case-control studies and, if applicable, for exposed and unexposed groups in cohort and cross-sectional studies.

**Note:** An Explanation and Elaboration article discusses each checklist item and gives methodological background and published examples of transparent reporting. The STROBE checklist is best used in conjunction with this article (freely available on the Web sites of PLoS Medicine at <http://www.plosmedicine.org/>, Annals of Internal Medicine at <http://www.annals.org/>, and Epidemiology at <http://www.epidem.com/>). Information on the STROBE Initiative is available at [www.strobe-statement.org](http://www.strobe-statement.org).

# BMJ Open

## Do sex differences in the prevalence of electrocardiographic abnormalities vary across ethnic groups living in the Netherlands? A cross-sectional analysis of the population-based HELIUS study

|                                 |                                                                                                                                                                                                                                                                                                                                                                                                                                                                                                                                                                                                                                                                                                                                                 |
|---------------------------------|-------------------------------------------------------------------------------------------------------------------------------------------------------------------------------------------------------------------------------------------------------------------------------------------------------------------------------------------------------------------------------------------------------------------------------------------------------------------------------------------------------------------------------------------------------------------------------------------------------------------------------------------------------------------------------------------------------------------------------------------------|
| Journal:                        | <i>BMJ Open</i>                                                                                                                                                                                                                                                                                                                                                                                                                                                                                                                                                                                                                                                                                                                                 |
| Manuscript ID                   | bmjopen-2020-039091.R1                                                                                                                                                                                                                                                                                                                                                                                                                                                                                                                                                                                                                                                                                                                          |
| Article Type:                   | Original research                                                                                                                                                                                                                                                                                                                                                                                                                                                                                                                                                                                                                                                                                                                               |
| Date Submitted by the Author:   | 25-Jun-2020                                                                                                                                                                                                                                                                                                                                                                                                                                                                                                                                                                                                                                                                                                                                     |
| Complete List of Authors:       | Bolijn, Renee; Amsterdam UMC, Public and Occupational Health<br>ter Haar, Cato; Amsterdam UMC, Cardiology; Leiden University Medical Center, Cardiology<br>Harskamp, Ralf; Amsterdam UMC, Department of General Practice<br>Tan, Hanno; Amsterdam UMC, Cardiology; ICIN-Netherlands Heart Institute<br>Kors, Jan; Erasmus Medical Center<br>Postema, Pieter; Amsterdam UMC, Clinical and Experimental Cardiology<br>Snijder, Marieke; Amsterdam UMC, Public and Occupational Health;<br>Amsterdam UMC, Clinical Epidemiology, Biostatistics and Bioinformatics<br>Peters, Ron; Amsterdam UMC, Cardiology<br>Kunst, Anton; Amsterdam UMC, Public and Occupational Health<br>van Valkengoed, Irene; Amsterdam UMC, Public and Occupational Health |
| <b>Primary Subject Heading</b>: | Cardiovascular medicine                                                                                                                                                                                                                                                                                                                                                                                                                                                                                                                                                                                                                                                                                                                         |
| Secondary Subject Heading:      | Public health, Epidemiology                                                                                                                                                                                                                                                                                                                                                                                                                                                                                                                                                                                                                                                                                                                     |
| Keywords:                       | Cardiac Epidemiology < CARDIOLOGY, Pacing & electrophysiology < CARDIOLOGY, EPIDEMIOLOGY, PUBLIC HEALTH                                                                                                                                                                                                                                                                                                                                                                                                                                                                                                                                                                                                                                         |
|                                 |                                                                                                                                                                                                                                                                                                                                                                                                                                                                                                                                                                                                                                                                                                                                                 |

SCHOLARONE™  
Manuscripts



I, the Submitting Author has the right to grant and does grant on behalf of all authors of the Work (as defined in the below author licence), an exclusive licence and/or a non-exclusive licence for contributions from authors who are: i) UK Crown employees; ii) where BMJ has agreed a CC-BY licence shall apply, and/or iii) in accordance with the terms applicable for US Federal Government officers or employees acting as part of their official duties; on a worldwide, perpetual, irrevocable, royalty-free basis to BMJ Publishing Group Ltd ("BMJ") its licensees and where the relevant Journal is co-owned by BMJ to the co-owners of the Journal, to publish the Work in this journal and any other BMJ products and to exploit all rights, as set out in our [licence](#).

The Submitting Author accepts and understands that any supply made under these terms is made by BMJ to the Submitting Author unless you are acting as an employee on behalf of your employer or a postgraduate student of an affiliated institution which is paying any applicable article publishing charge ("APC") for Open Access articles. Where the Submitting Author wishes to make the Work available on an Open Access basis (and intends to pay the relevant APC), the terms of reuse of such Open Access shall be governed by a Creative Commons licence – details of these licences and which [Creative Commons](#) licence will apply to this Work are set out in our licence referred to above.

Other than as permitted in any relevant BMJ Author's Self Archiving Policies, I confirm this Work has not been accepted for publication elsewhere, is not being considered for publication elsewhere and does not duplicate material already published. I confirm all authors consent to publication of this Work and authorise the granting of this licence.

1  
2  
3 **Do sex differences in the prevalence of electrocardiographic abnormalities vary**  
4  
5  
6 **across ethnic groups living in the Netherlands? A cross-sectional analysis of the**  
7  
8  
9 **population-based HELIUS study**  
10

11 Renee Bolijn<sup>1</sup>, C. Cato ter Haar<sup>2,3</sup>, Ralf E. Harskamp<sup>4</sup>, Hanno L. Tan<sup>2,5</sup>, Jan A. Kors<sup>6</sup>, Pieter G. Postema<sup>7</sup>,  
12  
13 Marieke B. Snijder<sup>1,8</sup>, Ron J.G. Peters<sup>2</sup>, Anton E. Kunst<sup>1</sup>, Irene G.M. van Valkengoed<sup>1</sup>  
14  
15

16  
17  
18 <sup>1</sup> *Amsterdam UMC, University of Amsterdam, Department of Public and Occupational Health,*  
19  
20 *Amsterdam Public Health research institute, Meibergdreef 9, Amsterdam, The Netherlands.*  
21

22  
23 <sup>2</sup> *Amsterdam UMC, University of Amsterdam, Department of Cardiology, Amsterdam Cardiovascular*  
24  
25 *Sciences, Meibergdreef 9, Amsterdam, The Netherlands.*  
26

27  
28 <sup>3</sup> *Leiden University Medical Center, Heart-Lung Center, Department of Cardiology, Leiden, The*  
29  
30 *Netherlands.*  
31

32  
33 <sup>4</sup> *Amsterdam UMC, University of Amsterdam, Department of General Practice, Amsterdam Public*  
34  
35 *Health research institute, Meibergdreef 9, Amsterdam, The Netherlands.*  
36

37  
38 <sup>5</sup> *Netherlands Heart Institute, Utrecht, The Netherlands.*  
39

40  
41 <sup>6</sup> *Department of Medical Informatics, Erasmus University Medical Center, Rotterdam, The*  
42  
43 *Netherlands.*  
44

45  
46 <sup>7</sup> *Amsterdam UMC, University of Amsterdam, Department of Clinical and Experimental Cardiology,*  
47  
48 *Amsterdam Cardiovascular Sciences, Meibergdreef 9, Amsterdam, The Netherlands.*  
49

50  
51 <sup>8</sup> *Amsterdam UMC, University of Amsterdam, Department of Clinical Epidemiology, Biostatistics and*  
52  
53 *Bioinformatics, Amsterdam Public Health research institute, Meibergdreef 9, Amsterdam, The*  
54  
55 *Netherlands*  
56  
57  
58  
59  
60

1  
2  
3 **Corresponding author:** Renee Bolijn, Amsterdam UMC, University of Amsterdam, Department of  
4  
5 Public and Occupational Health, Meibergdreef 9, 1105 AZ Amsterdam, The Netherlands. E-mail:  
6  
7 [r.bolijn@amsterdamumc.nl](mailto:r.bolijn@amsterdamumc.nl). Phone: +31 20 5664649  
8  
9

10  
11  
12 **Word count:** 3561  
13  
14  
15

16 **Keywords:** ECG abnormalities, sex differences, ethnic minorities, cardiovascular disease prevention,  
17  
18 HELIUS study  
19  
20  
21  
22  
23  
24  
25  
26  
27  
28  
29  
30  
31  
32  
33  
34  
35  
36  
37  
38  
39  
40  
41  
42  
43  
44  
45  
46  
47  
48  
49  
50  
51  
52  
53  
54  
55  
56  
57  
58  
59  
60

For peer review only

## ABSTRACT

**Objectives** Major electrocardiographic (ECG) abnormalities have been associated with increased risk of cardiovascular disease (CVD) burden in asymptomatic populations. However, sex differences in occurrence of major ECG abnormalities have been poorly studied, particularly across ethnic groups. The objectives were to investigate 1) sex differences in the prevalence of major and, as a secondary outcome, minor ECG abnormalities, 2) whether patterns of sex differences varied across ethnic groups, by age, and 3) to what extent conventional cardiovascular risk factors contributed to observed sex differences.

**Design** Cross-sectional analysis of population-based study.

**Setting** Multi-ethnic, population-based Healthy Life in an Urban Setting (HELIUS) cohort, Amsterdam, the Netherlands.

**Participants** 8,089 men and 11,369 women of Dutch, South-Asian Surinamese, African Surinamese, Ghanaian, Turkish, and Moroccan origin aged 18-70 years without CVD.

**Outcome measures** Age-adjusted and multivariable logistic regression analyses were performed to study sex differences in prevalence of major and, as secondary outcome, minor ECG abnormalities in the overall population, across ethnic groups, and by age-groups (18-35, 36-50, and >50 years).

**Results** Major and minor ECG abnormalities were less prevalent in women than men (4.6% versus 6.6%, and 23.8% versus 39.8%, respectively). After adjustment for conventional risk factors, sex differences in major abnormalities were smaller in ethnic minority groups (odds ratios [OR] ranged from 0.61 in Moroccans to 1.32 in South-Asian Surinamese) than in the Dutch (OR 0.49; 95% confidence interval [CI] 0.36-0.65). Only in South-Asian Surinamese, women did not have a lower odds than men (OR 1.32; 95% CI 0.96-1.84). The pattern of smaller sex differences in ethnic minority groups was more pronounced in older than in younger age-groups.

1  
2  
3 **Conclusions** The prevalence of major ECG abnormalities was lower in women than men. However, sex  
4 differences were less apparent in ethnic minority groups. Conventional risk factors did not contribute  
5 substantially to observed sex differences.  
6  
7  
8  
9  
10  
11  
12  
13  
14  
15  
16  
17  
18  
19  
20  
21  
22  
23  
24  
25  
26  
27  
28  
29  
30  
31  
32  
33  
34  
35  
36  
37  
38  
39  
40  
41  
42  
43  
44  
45  
46  
47  
48  
49  
50  
51  
52  
53  
54  
55  
56  
57  
58  
59  
60

For peer review only



## Strengths and limitations of this study

- Participants were sampled from the municipality registry and reflect a general population sample of adults of the major ethnic groups living in Amsterdam.
- Large sample sizes permit the study of sex differences within each ethnic group, including across age strata.
- Single electrocardiographic (ECG) measurements of 10 seconds without additional imaging techniques (e.g., echocardiography) may be suboptimal for the measurement of ECG abnormalities.
- The classification of 'major' and 'minor' ECG abnormalities may depend on criteria used, which may affect reported prevalence estimates.

## INTRODUCTION

The resting electrocardiogram (ECG) is an essential diagnostic instrument in patients with symptoms suggestive of cardiovascular disease (CVD).[1] Previous studies show that the occurrence of major ECG abnormalities is also associated with increased risk of CVD morbidity[2,3] and mortality[3,4] in asymptomatic populations. However, differences in the occurrence of major ECG abnormalities in men and women have been poorly studied. Insights in these sex differences may help to identify subpopulations with a future CVD burden and thus aid targeted (preventive) therapy.

Although studies have described the prevalence of major ECG abnormalities in men and women from diverse general populations,[5-11] only three studied sex differences in general populations specifically.[5-7] Whether the occurrence of ECG abnormalities differs by sex, independently of cardiovascular risk factors, is a topic of ongoing debate. Two studies suggested that the composite of major ECG abnormalities (e.g., atrial fibrillation, Q-wave or T-wave abnormalities) is more prevalent among men than women,[5,6] while another observed no sex differences.[7]

Differences in the occurrence of ECG abnormalities have been observed between ethnic groups living in similar contexts.[6,8,12,13] However, in Europe, the prevalence of major ECG abnormalities among ethnic minority populations at high risk for CVD, such as men and women of South-Asian origin,[14] is unknown. Additionally, it is unknown to what extent major ECG abnormalities vary between men and women across ethnic groups.

The prevalence of ECG abnormalities tends to increase with increasing age.[5] As larger sex differences in occurrence of CVD have been found in younger age-groups compared to older age-groups,[15] sex differences in prevalence of ECG abnormalities may also vary by age.

1  
2  
3 In this study, we investigated sex differences in the prevalence of major and, as a secondary outcome,  
4 minor ECG abnormalities, in a 18-70 year-old multi-ethnic population living in Amsterdam, the  
5 Netherlands. We assessed whether patterns of sex differences varied across ethnic groups, overall and  
6  
7 by age, and to what extent conventional cardiovascular risk factors contributed to observed sex  
8  
9 differences, overall and within subgroups.  
10  
11  
12  
13  
14  
15  
16  
17  
18  
19  
20  
21  
22  
23  
24  
25  
26  
27  
28  
29  
30  
31  
32  
33  
34  
35  
36  
37  
38  
39  
40  
41  
42  
43  
44  
45  
46  
47  
48  
49  
50  
51  
52  
53  
54  
55  
56  
57  
58  
59  
60

For peer review only

## METHODS

We used baseline data from the HHealthy Life in an Urban Setting (HELIUS) study, a multi-ethnic cohort study conducted in Amsterdam, the Netherlands. The HELIUS study has been described in detail elsewhere.[16,17] Briefly, baseline data collection took place between 2011 and 2015 and included participants of Dutch, South-Asian Surinamese, African Surinamese, Ghanaian, Moroccan, and Turkish origin aged 18-70 years living in Amsterdam. Potential participants were sampled with a simple random sampling method from the municipality registry, after stratification by ethnicity as defined by registered country of birth.[18] Data were obtained by questionnaire and physical examinations (including biological samples). The HELIUS study has been approved by the AMC Ethical Review Board. All participants provided written informed consent.

### ECG measurements

Standard 12-lead ECGs were recorded in supine position with a GE MAC5500 electrocardiograph at 500 samples/sec and analysed using the Modular ECG Analysis System (MEANS).[19] The measurement of ECG abnormalities has been described in detail elsewhere.[20] Briefly, ECG abnormalities were assessed by combining ECG diagnoses of the MEANS programs with Minnesota coding, Marquette 12SL ECG analysis software, and a cardiologist's interpretation. In case of discrepancies, ECGs were double checked. We classified ECG abnormalities into major and minor ECG abnormalities, based on previous research[7] and consensus discussion among experts (Appendix Table 1). This classification was completed prior to data analysis.

### Ethnicity

Ethnicity was defined by the individual's country of birth combined with the parental countries of birth.[18] Surinamese participants were further classified according to self-reported ethnic origin into "African", "South-Asian", "Javanese", or "other".

## Covariables

Family history of CVD was defined by a self-reported CVD diagnosis among first degree family members aged <60 years. Smoking was classified as current, past, or never smoker. For current smokers, the number of pack-years of smoking was calculated by multiplying the number of packs (containing 20 cigarettes or equivalent rates for cigars and pipe tobacco) smoked a day by the number of years smoked. Physical activity was defined as achieving  $\geq 30$  minutes of moderate- or high-intensity activity per day on  $\geq 5$  days per week.[21] Alcohol consumption (on average in the last 12 months) was classified as: none or low (men: 0-4; women: 0-2 beverages/week), moderate (men: 5-14; women: 3-7 beverages/week), and high (men: >14; women: >7 beverages/week).

Body mass index (BMI) was calculated in duplicate as weight (kg) divided by height squared ( $m^2$ ). Blood pressure (BP) was measured in duplicate using a validated automated digital BP device (WatchBP Home; Microlife AG) in a seated position after  $\geq 5$  minutes of rest. Hypertension was defined as systolic BP  $\geq 140$  mm Hg, diastolic BP  $\geq 90$  mm Hg, use of antihypertensive medication treatment, and/or self-reported hypertension.

Fasting blood samples were drawn to determine creatinine, lipid, and glucose concentrations (details on these measurements have been described elsewhere).[22] Chronic kidney disease (CKD) risk was categorized according to the risk of progression of kidney disease based on estimated Glomerular Filtration Rate and albuminuria levels:[23] (1) low, (2) moderately increased, (3) high and very high risk. Hypercholesterolemia was defined as total cholesterol  $\geq 5.0$  mmol/l, high-density lipoprotein cholesterol  $< 1.0$  mmol/l (men) or  $< 1.2$  mmol/l (women), low-density lipoprotein cholesterol  $\geq 3.0$  mmol/l (Friedewald formula[24]), triglycerides  $\geq 1.7$  mmol/l, use of lipid-lowering medication, and/or self-reported hypercholesterolemia. Participants were considered to have diabetes in case of a fasting

1  
2  
3 glucose  $\geq 7.0$  mmol/l, use of glucose-lowering medication and/or if they reported to be diagnosed with  
4  
5 diabetes by a doctor.  
6  
7  
8  
9

### 10 **Study population**

11  
12 Baseline data were available for 22,165 participants. We excluded those of Javanese Surinamese  
13  
14 (n=233), unknown Surinamese (n=267) origin, and with another/unknown ethnic origin (n=48). Next,  
15  
16 we excluded participants with a history of CVD (n=1,610; based on self-reported prior myocardial  
17  
18 infarction, cerebrovascular accident (CVA), angioplasty or bypass surgery (on heart or legs), use of  
19  
20 antiplatelet drugs (Anatomical Therapeutic Chemical [ATC] code B01AC), use of oral anticoagulants  
21  
22 (ATC codes B01AA, B01AE, B01AF), use of antiarrhythmic agents (ATC-codes C01A, C01B, C07AA07,  
23  
24 C08D), or paced rhythms). Finally, we excluded participants with missing ECG data (n=337) or with  
25  
26 missing data on  $\geq 1$  covariables (n=212), resulting in a study population of 19,458 participants  
27  
28 (Appendix Figure 1).  
29  
30  
31  
32  
33  
34

### 35 **Statistical analyses**

36  
37 Baseline characteristics were expressed as means (standard deviations [SD]) or frequencies  
38  
39 (percentages) by sex in the total population and per ethnic group. The age-adjusted prevalence of any  
40  
41 major ECG abnormality, any minor ECG abnormality, and a selection of common ECG abnormalities  
42  
43 (i.e., major ECG abnormalities with a prevalence of  $\geq 1\%$  and the top 5 most prevalent minor ECG  
44  
45 abnormalities) was calculated by sex, in the total population and by ethnicity, using the study  
46  
47 population as the standard. For reference, the overall prevalence of less common ECG abnormalities  
48  
49 is also provided, but only by sex in the total population. The prevalence of any major ECG abnormalities  
50  
51 was also calculated by age-groups (i.e., 18-35, 36-50, and  $>50$  years based on tertiles of the age  
52  
53 distribution in the total population) for all ethnic groups.  
54  
55  
56  
57  
58  
59  
60

1  
2  
3 We performed binary logistic regression analyses with hierarchal models to examine sex differences in  
4 prevalence of 1) any major ECG abnormalities and 2) any minor ECG abnormalities, adjusted for age  
5 and ethnicity (model 1), and additionally for hypertension, hypercholesterolemia, diabetes, and  
6 smoking status (model 2) to determine to what extent conventional cardiovascular risk factors  
7 contributed to observed differences. We also examined the additional contribution of other well-  
8 known cardiovascular risk factors, i.e., family history of CVD and CKD risk (model 3) and BMI, alcohol  
9 consumption, and physical activity (model 4). To study whether the sex differences varied between  
10 ethnic groups (i.e., effect modification), a statistical interaction term for sex and ethnicity on a  
11 multiplicative scale was added. Then, the main analyses (model 2 with interaction term) for major ECG  
12 abnormalities were repeated stratified by age-groups (18-35, 36-50, and >50 years) to examine the  
13 consistency of sex differences across ethnic groups among age-groups. All statistical analyses were  
14 performed in R studio version 1.1.453.[25]  $p$ -values <0.05 were regarded as statistically significant.

### 31 **Sensitivity analyses**

32 We repeated the main analyses excluding obese participants (BMI >30), since obesity may influence  
33 the accuracy of ECG measurements.[26] Furthermore, use of psychotropic medication may induce  
34 alterations of the ECG resulting in ECG abnormalities (e.g., QT prolongation).[27] Therefore, we  
35 repeated the analyses excluding participants with current use of psychotropic medication. Finally, we  
36 repeated the analyses using number of pack-years of smoking instead of smoking status, to examine  
37 whether the scale of the variables (numeric versus categorical) altered the results.

### 48 **Patient and public involvement**

49 There was no specific patient or public involvement in the development of the research questions,  
50 outcome measures, study design, and recruitment/conduct of the present study. However, for the  
51 core HELIUS study, several supportive measures were taken to enhance the enrolment of ethnic  
52

1  
2  
3 minority groups. For example, ethnic-specific communication strategies were used, such as working  
4 with faith communities (churches and mosques) and endorsement from local key figures.  
5 Understandability of and time to complete the questionnaire were also enquired among participants.  
6  
7 In addition, the present study is part of a larger project on sex and gender differences in CVD risk. As  
8 part of this project, interviews and a short survey on research priority setting according to CVD patients  
9 and persons at increased CVD risk were conducted. The present study aligns with our findings from  
10 these interviews and survey that more research on sex and gender differences in CVD was perceived  
11 as relevant by the target group.  
12  
13  
14  
15  
16  
17  
18  
19  
20  
21  
22  
23  
24  
25  
26  
27  
28  
29  
30  
31  
32  
33  
34  
35  
36  
37  
38  
39  
40  
41  
42  
43  
44  
45  
46  
47  
48  
49  
50  
51  
52  
53  
54  
55  
56  
57  
58  
59  
60



## RESULTS

Mean age was around 43 years (SD 13) in women and 44 years (SD 13) in men (Table 1). More than 20% of both men and women had a family history of CVD. Women were less often current smokers and had fewer mean pack-years of smoking compared to men, while the prevalence of high alcohol consumption was similar among men and women. Women had a higher mean BMI and were less physically active. Hypertension, hypercholesterolemia, and diabetes were less prevalent among women than men, while high CKD risk was equally prevalent among men and women. Women more often used psychotropic medication than men. These patterns in baseline characteristics differed across ethnic groups (Appendix Table 2).

**Table 1.** Baseline characteristics of 19,458 men and women with ECG measurements

|                                        | Men (n=8,089) | Women (n=11,369) |
|----------------------------------------|---------------|------------------|
| Age (years)                            | 43.8 (13.0)   | 43.1 (13.0)      |
| Ethnicity                              |               |                  |
| Dutch                                  | 1,873 (23.2)  | 2,293 (20.2)     |
| South-Asian Surinamese                 | 1,125 (13.9)  | 1,464 (12.9)     |
| African Surinamese                     | 1,411 (17.4)  | 2,266 (19.9)     |
| Ghanaian                               | 822 (10.2)    | 1,321 (11.6)     |
| Turkish                                | 1,451 (17.9)  | 1,769 (15.6)     |
| Moroccan                               | 1,407 (17.4)  | 2,256 (19.8)     |
| Family history of CVD (missing: n=217) | 1,637 (20.4)  | 2,611 (23.3)     |
| Smoker                                 |               |                  |
| Current                                | 2,539 (31.4)  | 2,032 (17.9)     |
| Past                                   | 2,021 (25.0)  | 1,753 (15.4)     |
| Never                                  | 3,529 (43.6)  | 7,584 (66.7)     |
| Pack-years of smoking (missing: n=191) | 5.4 (16.2)    | 1.8 (7.3)        |

|                                                            | Men (n=8,089) | Women (n=11,369) |
|------------------------------------------------------------|---------------|------------------|
| Achieving physical activity norm (missing: n=27)           | 5,020 (62.2)  | 5,963 (52.5)     |
| Alcohol consumption (missing: n=115)                       |               |                  |
| None or low                                                | 5,981 (74.4)  | 8,985 (79.5)     |
| Moderate                                                   | 1,526 (19.0)  | 1,549 (13.7)     |
| High                                                       | 528 (6.6)     | 774 (6.8)        |
| BMI (kg/m <sup>2</sup> ; missing: n=15)                    | 26.3 (4.2)    | 27.5 (5.8)       |
| CKD risk (missing: n=63)                                   |               |                  |
| Low                                                        | 7,684 (95.4)  | 10,689 (94.3)    |
| Moderate                                                   | 304 (3.8)     | 555 (4.9)        |
| High                                                       | 68 (0.8)      | 95 (0.8)         |
| Hypertension                                               | 3,026 (37.4)  | 3,594 (31.6)     |
| Hypercholesterolemia                                       | 5,752 (71.1)  | 7,147 (62.9)     |
| Diabetes                                                   | 829 (10.2)    | 952 (8.4)        |
| Use of psychotropic medication (missing: n=4) <sup>a</sup> | 397 (4.9)     | 679 (6.0)        |

Data are presented as means (standard deviations) or frequencies (percentages).

BMI, body mass index; CKD, chronic kidney disease; CVD, cardiovascular disease.

<sup>a</sup> Anatomical Therapeutic Chemical (ATC) codes: N03AE, N03AF, N03AG, N03AN, N05A, N05BA, N05C, N06A, N06BA, N07B, and R06AD02

Overall, the age-adjusted prevalence of major ECG abnormalities was lower among women (4.6%) compared to men (6.6%; Table 2). In most ethnic groups, women had a lower age-adjusted prevalence (range: 2.9%-6.1%) compared to men (range: 4.7%-7.9%), except in the South-Asian Surinamese (7.2% versus 6.0% respectively). Conventional cardiovascular risk factors and other well-known risk factors did not contribute substantially to the observed sex differences in major ECG abnormalities in the total population and within ethnic groups. For instance, the odds ratio (OR) of having a major ECG abnormality changed from 0.69 (95% confidence interval [CI] 0.61-0.78) to 0.71 (95% CI 0.62-0.81)

1  
2  
3 among women versus men after adjustment for hypertension, hypercholesterolemia, diabetes, and  
4  
5 smoking status, and to 0.67 (95% CI 0.58-0.76) after adjustment for family history of CVD, CKD risk,  
6  
7 BMI, alcohol consumption, and physical activity.  
8  
9

10  
11  
12 There was a general pattern of smaller sex differences in occurrence of major ECG abnormalities in the  
13  
14 ethnic minority groups compared to the Dutch (Table 2). The adjusted OR for women versus men  
15  
16 varied from 0.49 (95% CI 0.36-0.65) in the Dutch to 0.73 (95% CI 0.53-1.01) in Turkish. Only in the  
17  
18 South-Asian Surinamese group, women did not have a lower odds than men (adjusted OR 1.32; 95%  
19  
20 CI 0.96-1.84).  
21  
22  
23  
24  
25  
26  
27  
28  
29  
30  
31  
32  
33  
34  
35  
36  
37  
38  
39  
40  
41  
42  
43  
44  
45  
46  
47  
48  
49  
50  
51  
52  
53  
54  
55  
56  
57  
58  
59  
60

**Table 2.** Number of cases and age-adjusted prevalence of any major ECG abnormality by sex in the total population and by ethnic group, and the odds of major ECG abnormalities in women compared to men, overall and with an interaction term for sex and ethnicity

|                    | Men<br>(n of<br>cases, % <sup>a</sup> ) | Women<br>(n of<br>cases, % <sup>a</sup> ) | Model 1                       |                 |                           |                 | Model 2                       |                 |                           |                 |
|--------------------|-----------------------------------------|-------------------------------------------|-------------------------------|-----------------|---------------------------|-----------------|-------------------------------|-----------------|---------------------------|-----------------|
|                    |                                         |                                           | OR (95% CI)                   | <i>p</i> -value | Ratio of ORs<br>(95% CI)* | <i>p</i> -value | OR (95% CI)                   | <i>p</i> -value | Ratio of ORs<br>(95% CI)* | <i>p</i> -value |
| Overall            | 540 (6.6)                               | 518 (4.6)                                 | 0.69 (0.61-0.78) <sup>b</sup> | <0.001          | NA                        | NA              | 0.71 (0.62-0.81) <sup>b</sup> | <0.001          | NA                        | NA              |
| Dutch              | 137 (7.3)                               | 79 (3.6)                                  | 0.46 (0.34-0.61)              | <0.001          | Reference                 | NA              | 0.49 (0.36-0.65)              | <0.001          | Reference                 | NA              |
| SA Surinamese      | 63 (6.0)                                | 110 (7.2)                                 | 1.24 (0.90-1.72)              | 0.19            | 2.69 (1.75-4.17)          | <0.001          | 1.32 (0.96-1.84)              | 0.09            | 2.72 (1.76-4.21)          | <0.001          |
| African Surinamese | 107 (7.6)                               | 118 (5.3)                                 | 0.68 (0.51-0.89)              | <0.01           | 1.47 (0.99-2.18)          | 0.06            | 0.68 (0.52-0.90)              | <0.01           | 1.40 (0.94-2.09)          | 0.10            |
| Ghanaian           | 72 (7.9)                                | 71 (6.1)                                  | 0.70 (0.49-0.98)              | 0.04            | 1.51 (0.97-2.37)          | 0.07            | 0.71 (0.51-1.01)              | 0.055           | 1.47 (0.94-2.30)          | 0.09            |
| Turkish            | 89 (6.1)                                | 77 (4.4)                                  | 0.71 (0.52-0.98)              | 0.04            | 1.55 (1.01-2.37)          | 0.045           | 0.73 (0.53-1.01)              | 0.058           | 1.51 (0.98-2.32)          | 0.06            |
| Moroccan           | 72 (4.7)                                | 63 (2.9)                                  | 0.59 (0.42-0.84)              | <0.01           | 1.29 (0.82-2.02)          | 0.27            | 0.61 (0.43-0.87)              | <0.01           | 1.26 (0.80-1.99)          | 0.33            |

CI, confidence interval; NA, not applicable; OR, odds ratio; SA, South-Asian.

Significant *p*-values (*p*<0.05) are printed in italic.

Model 1: adjusted for age; model 2: adjusted for age, hypertension, hypercholesterolemia, diabetes, and smoking status

<sup>a</sup> Age-adjusted prevalence.

<sup>b</sup> Additionally adjusted for ethnicity.

\* Measure of effect modification on multiplicative scale (statistical interaction term).

In the total population, the most frequently observed major ECG abnormalities were T-wave abnormalities (1.2%), microvoltages (1.2%), and (ECG suggestive of) cardiomyopathy (1.1%) among women and T-wave abnormalities (1.6%), right bundle branch block (RBBB; 1.4%), and cardiomyopathy (1.1%) among men. Among South-Asian Surinamese women, the only group of women with no lower odds than men, microvoltages (2.9%), cardiomyopathy (1.9%), and T-wave abnormalities (1.5%) were the most prevalent major ECG abnormalities. T-wave abnormalities (1.9%), cardiomyopathy (1.2%), and RBBB (1.1%) were the most prevalent major ECG abnormalities among South-Asian Surinamese men.

As expected, the prevalence of major ECG abnormalities was higher in older than younger age-groups in both men and women (Figure 1). The general pattern of smaller sex differences in the ethnic minority groups compared to the Dutch differed across the age strata (Table 3). In the older age groups, the adjusted sex difference in the odds of having a major ECG abnormality appeared less pronounced in ethnic minorities compared to the Dutch, whereas this sex difference appeared more similar across ethnic group in the youngest age group. Whereas women in all ethnic groups had a lower odds compared to men across all age strata, this was only the case in the youngest age-group of South-Asian Surinamese women versus men.

**Table 3.** The odds of major ECG abnormalities in women compared to men by age-groups, in the total population and with an interaction term for sex and ethnicity

| Aged 18-35 years (n=5870) <sup>a</sup> | OR (95% CI)      | p-value | Ratio of ORs (95% CI)* | p-value |
|----------------------------------------|------------------|---------|------------------------|---------|
| Overall <sup>b</sup>                   | 0.38 (0.27-0.54) | <0.001  | NA                     | NA      |
| Dutch                                  | 0.30 (0.14-0.60) | <0.01   | Reference              | NA      |
| South-Asian Surinamese                 | 0.48 (0.18-1.18) | 0.12    | 1.58 (0.47-5.11)       | 0.45    |
| African Surinamese                     | 0.38 (0.12-1.05) | 0.07    | 1.25 (0.34-4.44)       | 0.73    |

|                                               |                    |                |                               |                |
|-----------------------------------------------|--------------------|----------------|-------------------------------|----------------|
| Ghanaian                                      | 0.48 (0.13-1.77)   | 0.26           | 1.60 (0.37-7.07)              | 0.52           |
| Turkish                                       | 0.55 (0.28-1.09)   | 0.09           | 1.84 (0.69-5.01)              | 0.23           |
| Moroccan                                      | 0.23 (0.09-0.55)   | <0.01          | 0.77 (0.23-2.42)              | 0.65           |
| <b>Aged 36-50 years (n=7099)<sup>a</sup></b>  | <b>OR (95% CI)</b> | <b>p-value</b> | <b>Ratio of ORs (95% CI)*</b> | <b>p-value</b> |
| Overall <sup>b</sup>                          | 0.89 (0.70-1.12)   | 0.32           | NA                            | NA             |
| Dutch                                         | 0.51 (0.28-0.90)   | 0.02           | Reference                     | NA             |
| South-Asian Surinamese                        | 2.61 (1.39-5.20)   | <0.01          | 5.13 (2.19-12.56)             | <0.001         |
| African Surinamese                            | 0.49 (0.29-0.85)   | 0.01           | 0.97 (0.44-2.16)              | 0.94           |
| Ghanaian                                      | 0.91 (0.50-1.71)   | 0.76           | 1.79 (0.78-4.22)              | 0.18           |
| Turkish                                       | 1.04 (0.64-1.69)   | 0.87           | 2.04 (0.97-4.38)              | 0.06           |
| Moroccan                                      | 0.92 (0.51-1.67)   | 0.79           | 1.81 (0.80-4.17)              | 0.16           |
| <b>Aged &gt;50 years (n=6489)<sup>a</sup></b> | <b>OR (95% CI)</b> | <b>p-value</b> | <b>Ratio of ORs (95% CI)*</b> | <b>p-value</b> |
| Overall <sup>b</sup>                          | 0.74 (0.62-0.89)   | <0.01          | NA                            | NA             |
| Dutch                                         | 0.54 (0.37-0.78)   | <0.01          | Reference                     | NA             |
| South-Asian Surinamese                        | 1.22 (0.79-1.91)   | 0.37           | 2.27 (1.28-4.06)              | <0.01          |
| African Surinamese                            | 0.84 (0.59-1.18)   | 0.31           | 1.55 (0.94-2.59)              | 0.09           |
| Ghanaian                                      | 0.74 (0.46-1.17)   | 0.20           | 1.37 (0.75-2.48)              | 0.30           |
| Turkish                                       | 0.55 (0.31-0.96)   | 0.04           | 1.02 (0.51-2.00)              | 0.96           |
| Moroccan                                      | 0.68 (0.40-1.16)   | 0.16           | 1.26 (0.66-2.42)              | 0.49           |

CI, confidence interval; NA, not applicable; OR, odds ratio.

<sup>a</sup> Model adjustment: age, hypertension, hypercholesterolemia, diabetes, and smoking status.

<sup>b</sup> These models were also adjusted for ethnicity.

\* Measure of effect modification on multiplicative scale (statistical interaction term).

Women had a lower prevalence of minor ECG abnormalities (range: 16.2%-35.6%) compared to men (range: 28.5%-55.7%; Appendix Table 3). Sex differences in minor ECG abnormalities were similar across ethnic groups, and were not influenced by conventional risk factors.

1  
2  
3  
4  
5 The prevalence of most common ECG abnormalities was also lower in women than men (Appendix  
6 Table 4a). Only mildly prolonged QTc interval was more prevalent in women than in men. Patterns  
7  
8 were similar across ethnic groups. The prevalence of most less common ECG abnormalities was also  
9  
10 lower in women than women, except for microvoltages, severely prolonged QTc (Bazett) interval, and  
11  
12 left bundle branch block (LBBB), atrial rhythm, and sinus tachycardia (Appendix Table 4b).  
13  
14  
15  
16  
17  
18

19 Sensitivity analyses did not alter our interpretation of findings (data not shown).  
20  
21  
22  
23  
24  
25  
26  
27  
28  
29  
30  
31  
32  
33  
34  
35  
36  
37  
38  
39  
40  
41  
42  
43  
44  
45  
46  
47  
48  
49  
50  
51  
52  
53  
54  
55  
56  
57  
58  
59  
60

## DISCUSSION

In our study, women have an overall lower age-adjusted prevalence of major ECG abnormalities than men. Sex differences in the prevalence of major ECG abnormalities are smaller in the ethnic minority groups than in the Dutch, particularly in older age-groups. Differences in conventional cardiovascular risk factors and other well-known risk factors do not contribute substantially to these sex differences.

Our study has limitations. First, the results may be affected by selection bias due to non-response (response rate: 28%). Non-response analyses showed that women were more likely to participate than men, Turks and Moroccans were less likely to participate compared to other ethnic groups, and participants were slightly older than non-participants.[17] However, we were able to include large numbers of both men and women, each ethnic group, and age-group, indicating sufficient representation of all subgroups. This is relevant because previous work has shown that relative differences in CVD risk factors between ethnic groups are similar to other European countries,[28] suggesting that our results are generalizable to other European countries. Second, the definition of prior CVD was not comprehensive, as data on self-reported prior CVD other than myocardial infarction and CVA were lacking. However, we also excluded participants with a prior angioplasty or bypass surgery (on heart or legs), or paced rhythms, and those participants using antiplatelet drugs, oral anticoagulants, or antiarrhythmic agents, and verified that our results were consistent in analyses restricted to those with a favourable cardiovascular risk profile (post-hoc analysis in participants without hypertension, hypercholesterolemia, diabetes, and those not smoking; data not shown). Therefore, it is unlikely that our results were substantially affected by misclassification. Third, single ECG measurements may have been suboptimal for the measurement of ECG abnormalities, potentially affecting the prevalence estimates. Some common expressions of CVD might not always be detectable by a single ECG measurement of 10 seconds, such as paroxysmal atrial fibrillation, and some ECG abnormalities need additional diagnostic measurements. However, 24-hour ECG monitoring with



1  
2  
3 portable ECG devices and additional imaging techniques (e.g., echocardiography) are often not feasible  
4  
5 in population-based studies. Finally, the classification of 'major' and 'minor' ECG abnormalities  
6  
7 depends on criteria used, and may be variable given the complexity of detailed ECG interpretation. For  
8  
9 instance, the level of severity of some abnormalities may depend on the full clinical assessment or on  
10  
11 combinations of abnormalities (e.g., RBBB with left axis deviation). We also did not distinguish between  
12  
13 men and women, ethnic groups, and age-groups in the assessment of the classification of major and  
14  
15 minor abnormalities. If future research would reveal that the implication of abnormalities is different  
16  
17 for any of these groups, this may influence the magnitude of the observed differences in our study.  
18  
19

20  
21  
22  
23 Similar to previous studies reporting on the prevalence of composite major ECG abnormalities  
24  
25 stratified by sex,[5-8,10,11] we observed an overall lower prevalence of major ECG abnormalities in  
26  
27 women compared to men in most ethnic groups. Prevalence estimates in both men and women were  
28  
29 within the range reported in most previous studies (range: 3.0%-13.2%),[5,6,8,10] except two studies  
30  
31 with higher estimates.[7,11] T-wave abnormalities were the most prevalent major ECG abnormalities  
32  
33 in both men and women in our study and most previous studies.[5-7,10,11] A much larger  
34  
35 heterogeneity has been reported in previous studies in prevalence of minor ECG abnormalities, ranging  
36  
37 from 4.5% to 31.6% in women[5,6,8,9,11] and from 7.3% to 45.7% in men.[5,6,8,9,11] Our prevalence  
38  
39 was higher compared to most studies, most likely due to differences in the classification of major and  
40  
41 minor ECG abnormalities.  
42  
43  
44  
45  
46  
47

48 The observed sex differences in major ECG abnormalities are in line with known differences in  
49  
50 cardiovascular pathophysiology and epidemiology of CVD between men and women.[29,30] For  
51  
52 instance, men tend to develop coronary artery disease (CAD) earlier than women, resulting in a higher  
53  
54 incidence of CAD in men compared to women, in particular at a younger age.[29,30] This age-effect is  
55  
56  
57  
58  
59  
60

1  
2  
3 consistent with our observations across ethnic groups of larger sex differences in prevalence of major  
4  
5 ECG abnormalities in the youngest age-group compared to the older age-groups.  
6  
7

8  
9  
10 Differential patterning of cardiovascular risk factors did not explain the observed sex differences in  
11  
12 prevalence of major ECH abnormalities overall and across ethnic groups. This finding is consistent with  
13  
14 two previous studies on sex differences in ECG abnormalities[5,6] but not with another study.[7] Other  
15  
16 explanations for the relative cardiovascular advantage of women compared to men at a younger age  
17  
18 are still unclear, but may relate to sex hormones, with a prominent role for the protective effects of  
19  
20 estrogen in the development of CVD among premenopausal women.[29] Our findings of larger sex  
21  
22 differences in prevalence of major ECG abnormalities in the youngest age-group compared to the older  
23  
24 age-groups support this hypothesis.  
25  
26  
27

28  
29  
30 We observed that only South-Asian Surinamese women did not have a lower odds of having a major  
31  
32 ECG abnormality compared to South-Asian Surinamese men, which was mainly due to the higher  
33  
34 prevalence of major ECG abnormalities among South-Asian Surinamese women compared to other  
35  
36 women. South-Asian populations living in Europe are already considered a high-risk population for  
37  
38 CVD[14] and our findings may suggest that South-Asian Surinamese women specifically are a target  
39  
40 group for CVD prevention strategies. Although women had a consistently lower odds of having a major  
41  
42 ECG abnormality than men in all other ethnic groups (except South-Asian Surinamese), Dutch women  
43  
44 had a larger cardiovascular advantage than the other women. These findings are in line with a previous  
45  
46 study from the USA showing a larger gap between men and women of the white majority population  
47  
48 compared to black men and women in CAD mortality.[31] In contrast, a Dutch study on sex disparities  
49  
50 in myocardial infarction incidence observed a smaller sex difference in the Dutch majority population  
51  
52 compared to minority populations originating from Morocco, South-Asia, and Turkey.[15] Explanations  
53  
54  
55  
56  
57  
58  
59  
60

1  
2  
3 for the discrepancy between this and our study are unclear, but may relate to differences in study  
4  
5 populations and exclusion criteria.  
6  
7  
8

9  
10 Differential patterning of cardiovascular risk factors did not explain the smaller cardiovascular  
11  
12 advantage among minority women compared to Dutch women, suggesting that other factors may be  
13  
14 relevant. Psychosocial factors (e.g., discrimination), for instance, may be important risk factors for  
15  
16 major ECG abnormalities in some groups of participants, potentially through stress and lifestyle-  
17  
18 related factors. For instance, an American study found that current and chronic stress were associated  
19  
20 with subclinical atherosclerosis in South-Asian women but not in South-Asian men.[32] Further  
21  
22 research needs to confirm whether these psychosocial factors may also explain ethnic-specific  
23  
24 variation in sex differences in occurrence of major ECG abnormalities.  
25  
26  
27

28  
29  
30 The observed sex differences in occurrence of major ECG abnormalities, overall and within subgroups,  
31  
32 may also reflect that ECG reference values do not differentiate between men and women (except QTc  
33  
34 duration), ethnic groups, or age-groups. Normal values for ECGs may differ for women[33] and non-  
35  
36 white groups[34] compared to white men, in whom the ECG reference criteria were developed. This is  
37  
38 problematic since subgroups with pathological ECGs and potentially related cardiovascular risk might  
39  
40 have been missed, or have a false positive diagnosis. For example, some studies suggest that current  
41  
42 ECG criteria for microvoltages may be less valid for women[35] and Asian populations,[36] which may  
43  
44 have resulted in an overestimation of the occurrence of microvoltages among South-Asian Surinamese  
45  
46 women in our study.  
47  
48  
49

50  
51  
52 In conclusion, we observed sex differences in ECG abnormalities and identified subpopulations with a  
53  
54 relatively high prevalence, e.g., Dutch men, and men and women of South-Asian and African origin.  
55  
56 Given the association of major ECG abnormalities with CVD morbidity and mortality,[2-4] these groups  
57  
58  
59  
60

1  
2  
3 may particularly benefit from prevention strategies to reduce the future burden of CVD. Moreover,  
4  
5 the observed differences occurred irrespective of conventional risk factors, suggesting that  
6  
7 opportunities to reduce the burden of CVD might be missed if prevention strategies are solely targeted  
8  
9 at those with conventional risk factors. Previous studies have suggested that ECG measures may be, in  
10  
11 addition to established cardiovascular risk factors, useful for the prediction of future CVD in  
12  
13 intermediate and high-risk groups.[37,38] However, evidence is still limited, potential harms of  
14  
15 screening are unknown, and ECG reference values are not sex-, ethnic-, and age-specific. Hence,  
16  
17 screening for CVD with ECG is currently not recommended.[39] In future research, ECG reference  
18  
19 values should be validated in ethnically diverse populations of men and women of different age-groups  
20  
21 in order to further investigate the occurrence of ECG abnormalities and the potentially added value of  
22  
23 an ECG to cardiovascular risk classification.  
24  
25  
26  
27  
28  
29  
30  
31  
32  
33  
34  
35  
36  
37  
38  
39  
40  
41  
42  
43  
44  
45  
46  
47  
48  
49  
50  
51  
52  
53  
54  
55  
56  
57  
58  
59  
60

## ACKNOWLEDGEMENTS

We are most grateful to the participants of the HELIUS study and the management team, research nurses, interviewers, research assistants and other staff who have taken part in gathering the data of this study.

## COMPETING INTERESTS

None declared.

## FUNDING

The HELIUS study is conducted by the Academic Medical Center Amsterdam and the Public Health Service of Amsterdam. Both organizations provided core support for HELIUS. The HELIUS study is also funded by the Dutch Heart Foundation, the Netherlands Organization for Health Research and Development (ZonMw), European Union (FP-7), and the European Fund for the Integration of non-EU immigrants (EIF). This work was additionally supported by a grant from the ZonMw Gender and Health Program (grant number 849200008). HLT has received funding from the European Union's Horizon 2020 research and innovation programme under acronym ESCAPE-NET (grant number 733381).

## DATA AVAILABILITY STATEMENT

Data are available upon reasonable request.

## AUTHORS' CONTRIBUTIONS

RB and IGMvV contributed to the conception and design of the work; CCtH, REH, PGP, and AEK contributed to the design. MBS and RJGP contributed to the acquisition of the data; all authors contributed to the analysis and interpretation of the results. RB drafted the manuscript. CCtH, REH, HLT, JAK, PGP, MBS, RJGP, AEK, and IGMvV critically revised the manuscript. All authors gave final approval and agree to be accountable for all aspects of work ensuring integrity and accuracy.

For peer review only

## REFERENCES

- [1] Fye WB. A history of the origin, evolution, and impact of electrocardiography. *Am J Cardiol* 1994;73:937-949.
- [2] Denes P, Larson JC, Lloyd-Jones DM, et al. Major and minor ECG abnormalities in asymptomatic women and risk of cardiovascular events and mortality. *JAMA* 2007;297:978-985.
- [3] Machado DB, Crow RS, Boland LL, et al. Electrocardiographic findings and incident coronary heart disease among participants in the Atherosclerosis Risk in Communities (ARIC) study. *Am J Cardiol* 2006;97:1176-1181.
- [4] De Bacquer D, De Backer G, Kornitzer M, et al. Prognostic value of ECG findings for total, cardiovascular disease, and coronary heart disease death in men and women. *Heart* 1998;80:570-577.
- [5] De Bacquer D, De Backer G and Kornitzer M. Prevalences of ECG findings in large population based samples of men and women. *Heart* 2000;84:625-633.
- [6] Vitelli LL, Crow RS, Shahar E, et al. Electrocardiographic findings in a healthy biracial population. *Am J Cardiol* 1998;81:453-459.
- [7] Prineas RJ, Le A, Soliman EZ, et al. United States national prevalence of electrocardiographic abnormalities in black and white middle-age (45-to 64-year) and older ( $\geq 65$ -year) adults (from the Reasons for Geographic and Racial Differences in Stroke Study). *Am J Cardiol* 2012;109:1223-1228.
- [8] Walsh III JA, Prineas R, Daviglus ML, et al. Prevalence of electrocardiographic abnormalities in a middle-aged, biracial population: Coronary Artery Risk Development in Young Adults study. *J Electrocardiol* 2010;43:385.e1-385.e9.
- [9] Liao YL, Liu KA, Dyer A, et al. Major and minor electrocardiographic abnormalities and risk of death from coronary heart disease, cardiovascular diseases and all causes in men and women. *J Am Coll Cardiol* 1988;12:1494-1500.

- 1  
2  
3 [10] Pinto-Filho MM, Brant LC, Foppa M, et al. Major electrocardiographic abnormalities according to  
4 the Minnesota Coding System among Brazilian adults (from the ELSA-Brasil Cohort Study). *Am J Cardiol*  
5 2017;119:2081-2087.  
6  
7  
8  
9 [11] Wu C-C, Yeh W-T, Crow RS, et al. Comparison of electrocardiographic findings and associated risk  
10 factors between Taiwan Chinese and US White adults. *Int J Cardiol* 2008;128:224-231.  
11  
12  
13 [12] Perez MV, Yaw TS, Myers J, et al. Prognostic value of the computerized ECG in Hispanics. *Clin*  
14 *Cardiol* 2007;30:189-194.  
15  
16  
17 [13] Santhanakrishnan R, Wang N, Larson MG, et al. Racial differences in electrocardiographic  
18 characteristics and prognostic significance in Whites versus Asians. *J Am Heart Assoc* 2016;5:e002956.  
19  
20  
21 [14] Cainzos-Achirica M, Fedeli U, Sattar N, et al. Epidemiology, risk factors, and opportunities for  
22 prevention of cardiovascular disease in individuals of South Asian ethnicity living in Europe.  
23 *Atherosclerosis* 2019;286:105-113.  
24  
25  
26 [15] van Oeffelen AA, Vaartjes I, Stronks K, et al. Sex disparities in acute myocardial infarction  
27 incidence: Do ethnic minority groups differ from the majority population? *Eur J Prev Cardiol*  
28 2015;22:180-188.  
29  
30  
31 [16] Stronks K, Snijder MB, Peters RJ, et al. Unravelling the impact of ethnicity on health in Europe: the  
32 HELIUS study. *BMC Public Health* 2013;13:402.  
33  
34  
35 [17] Snijder MB, Galenkamp H, Prins M, et al. Cohort profile: the Healthy Life in an Urban Setting  
36 (HELIUS) study in Amsterdam, the Netherlands. *BMJ Open* 2017;7:e017873.  
37  
38  
39 [18] Stronks K, Kulu-Glasgow I and Agyemang C. The utility of 'country of birth' for the classification of  
40 ethnic groups in health research: the Dutch experience. *Ethn Health* 2009;14:255-269.  
41  
42  
43 [19] van Bommel J, Kors J and Van Herpen G. Methodology of the modular ECG analysis system MEANS.  
44 *Methods Inf Med* 1990;29:346-353.  
45  
46  
47  
48  
49  
50  
51  
52  
53  
54  
55  
56  
57  
58  
59  
60



1  
2  
3 [20] ter Haar C, Kors J, Peters R, et al. The prevalence of electrocardiograms exceeding thresholds for  
4 ST-elevation myocardial infarction in apparently healthy individuals: the role of ethnicity. *J Am Heart*  
5 *Assoc* 2020:Accepted for publication.

6  
7  
8  
9 [21] Wendel-Vos GW, Schuit AJ, Saris WH, et al. Reproducibility and relative validity of the short  
10 questionnaire to assess health-enhancing physical activity. *J Clin Epidemiol* 2003;56:1163-1169.

11  
12  
13 [22] Agyemang C, Snijder MB, Adjei DN, et al. Ethnic disparities in CKD in the Netherlands: the HEalthy  
14 Life in an Urban Setting (HELIUS) study. *Am J Kidney Dis* 2016;67:391-399.

15  
16  
17 [23] Levin A, Stevens PE, Bilous RW, et al. Kidney Disease: Improving Global Outcomes (KDIGO) CKD  
18 Work Group. KDIGO 2012 clinical practice guideline for the evaluation and management of chronic  
19 kidney disease. *Kidney Int Suppl* 2013;3:1-150.

20  
21  
22 [24] Friedewald WT, Levy RI and Fredrickson DS. Estimation of the concentration of low-density  
23 lipoprotein cholesterol in plasma, without use of the preparative ultracentrifuge. *Clin Chem*  
24 1972;18:499-502.

25  
26 [25] RStudio Team. RStudio: Integrated Development for R. Boston, MA: RStudio, Inc., 2016.

27  
28 [26] Abergel E, Tase M, Menard J, et al. Influence of obesity on the diagnostic value of  
29 electrocardiographic criteria for detecting left ventricular hypertrophy. *Am J Cardiol* 1996;77:739-744.

30  
31 [27] Vlachos K, Georgopoulos S, Efremidis M, et al. An update on risk factors for drug-induced  
32 arrhythmias. *Expert Rev Clin Pharmacol* 2016;9:117-127.

33  
34 [28] Agyemang C, Kunst AE, Bhopal R, et al. Brief report: diabetes prevalence in populations of South  
35 Asian Indian and African origins: a comparison of England and The Netherlands. *Epidemiology*  
36 2011;22:563-567.

37  
38 [29] Regitz-Zagrosek V and Kararigas G. Mechanistic pathways of sex differences in cardiovascular  
39 disease. *Physiol Rev* 2016;97:1-37.

40  
41 [30] Mosca L, Barrett-Connor E and Kass Wenger N. Sex/gender differences in cardiovascular disease  
42 prevention: what a difference a decade makes. *Circulation* 2011;124:2145-2154.

- 1  
2  
3 [31] Ho JE, Paultre F and Mosca L. The gender gap in coronary heart disease mortality: is there a  
4 difference between blacks and whites? *J Womens Health* 2005;14:117-127.  
5  
6  
7 [32] Shah BM, Shah S, Kandula NR, et al. Psychosocial factors associated with subclinical atherosclerosis  
8 in South Asians: the MASALA study. *J Immigr Minor Health* 2016;18:1317-1327.  
9  
10  
11 [33] Rijnbeek PR, Van Herpen G, Bots ML, et al. Normal values of the electrocardiogram for ages 16-90  
12 years. *J Electrocardiol* 2014;47:914-921.  
13  
14  
15 [34] Macfarlane P, Katibi I, Hamde S, et al. Racial differences in the ECG-selected aspects. *J*  
16 *Electrocardiol* 2014;47:809-814.  
17  
18  
19 [35] Clark E, Devine B and Macfarlane P. Age and sex dependent criteria for lower limits of QRS  
20 voltages. *2006 Computers in Cardiology*. Valencia, Spain: IEEE, 17-20 September 2006, p. 17-20.  
21  
22  
23 [36] Yang T-F and Macfarlane PW. Comparison of the derived vectorcardiogram in apparently healthy  
24 whites and Chinese. *Chest* 1994;106:1014-1020.  
25  
26  
27 [37] Badheka AO, Patel N, Tuliani TA, et al. Electrocardiographic abnormalities and reclassification of  
28 cardiovascular risk: insights from NHANES-III. *Am J Med* 2013;126:319-326.  
29  
30  
31 [38] Auer R, Bauer DC, Marques-Vidal P, et al. Association of major and minor ECG abnormalities with  
32 coronary heart disease events. *JAMA* 2012;307:1497-1505.  
33  
34  
35 [39] Jonas DE, Reddy S, Middleton JC, et al. Screening for cardiovascular disease risk with resting or  
36 exercise electrocardiography: evidence report and systematic review for the US Preventive Services  
37 Task Force. *JAMA* 2018;319:2315-2328.  
38  
39  
40  
41  
42  
43  
44  
45  
46  
47  
48  
49  
50  
51  
52  
53  
54  
55  
56  
57  
58  
59  
60

1  
2  
3 **FIGURE LEGEND**  
4  
5

6 **Figure 1.** Prevalence of any major ECG abnormalities in men and women by age-groups and ethnicity.  
7

8  
9 **Appendix Figure 1.** Flow diagram of the study population  
10  
11  
12  
13  
14  
15  
16  
17  
18  
19  
20  
21  
22  
23  
24  
25  
26  
27  
28  
29  
30  
31  
32  
33  
34  
35  
36  
37  
38  
39  
40  
41  
42  
43  
44  
45  
46  
47  
48  
49  
50  
51  
52  
53  
54  
55  
56  
57  
58  
59  
60

For peer review only

1  
2  
3  
4  
5  
6  
7  
8  
9  
10  
11  
12  
13  
14  
15  
16  
17  
18  
19  
20  
21  
22  
23  
24  
25  
26  
27  
28  
29  
30  
31  
32  
33  
34  
35  
36  
37  
38  
39  
40  
41  
42  
43  
44  
45  
46  
47  
48  
49  
50  
51  
52  
53  
54  
55  
56  
57  
58  
59  
60



218x309mm (300 x 300 DPI)

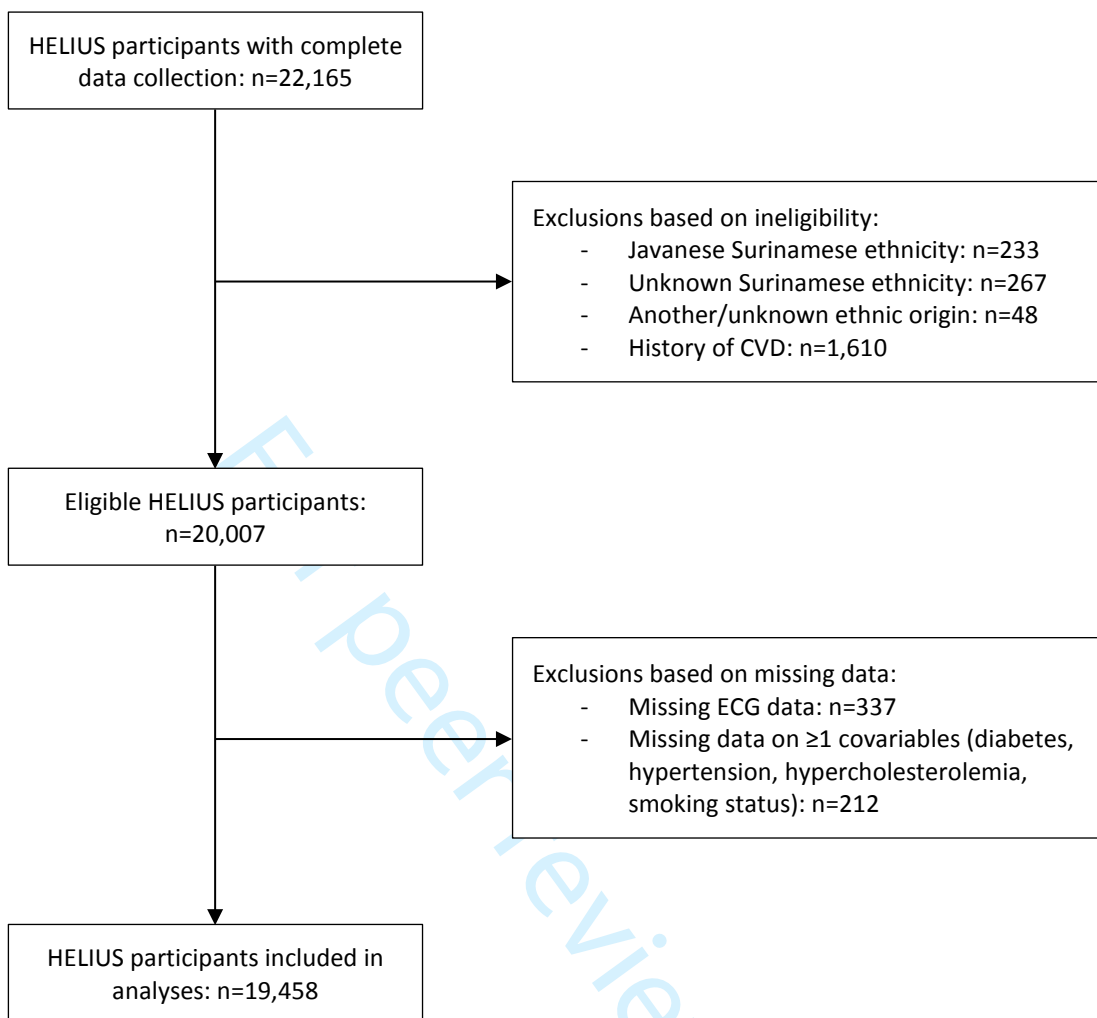

Appendix Figure 1. Flow diagram of the study population

**Appendix Table 1.** Classification of major and minor ECG abnormalities

| <b>Major ECG abnormalities</b>                                                                                            |
|---------------------------------------------------------------------------------------------------------------------------|
| Atrial fibrillation or flutter                                                                                            |
| Ventricular rhythm                                                                                                        |
| Sinus bradycardia + idioventricular rhythm                                                                                |
| 2 <sup>nd</sup> degree atrioventricular conduction disturbances                                                           |
| 3 <sup>rd</sup> degree atrioventricular conduction disturbances                                                           |
| Ventricular preexcitation                                                                                                 |
| Left bundle branch block (LBBB)                                                                                           |
| Right bundle branch block (RBBB)                                                                                          |
| Nonspecific ventricular conduction disturbances (QRS duration $\geq 120$ ms)                                              |
| Severely prolonged QTc (Bazett) interval (men: QTc $> 470$ ms, women: QTc $\geq 480$ ms)                                  |
| Severely shortened QTc (Bazett) interval (men: QTc $< 330$ ms, women: QTc $< 340$ ms)                                     |
| Extreme axis deviation                                                                                                    |
| Pathological Q waves                                                                                                      |
| Microvoltages                                                                                                             |
| T-wave abnormalities                                                                                                      |
| ECG suggestive of cardiomyopathy                                                                                          |
| Miscellaneous (including ECG suggestive of Brugada syndrome)                                                              |
| <b>Minor ECG abnormalities</b>                                                                                            |
| Sinus tachycardia                                                                                                         |
| Sinus bradycardia                                                                                                         |
| Atrial rhythm                                                                                                             |
| Frequent premature atrial contractions (PACs) and/or premature ventricular contractions (PVCs)                            |
| Atrial abnormalities                                                                                                      |
| 1 <sup>st</sup> degree atrioventricular conduction disturbances                                                           |
| Left anterior fascicular block (LAFB)                                                                                     |
| Mild ( $110 \leq \text{QRS} < 120$ ms) ventricular conduction disturbances, including incomplete LBBB and incomplete RBBB |

1  
2  
3 Mildly prolonged QTc (Bazett) interval (men: QTc >450ms, women: QTc ≥460ms)

4  
5 Mildly shortened QTc (Bazett) interval (men: QTc <360ms, women: QTc <370ms)

6  
7 Left axis deviation

8  
9 Right axis deviation

10  
11 Indeterminate heart axis

12  
13 Possible pathological Q waves

14  
15 Left ventricular hypertrophy (LVH)

16  
17 

---

ECG, electrocardiogram.

**Appendix Table 2.** Baseline characteristics of 19,548 participants with ECG measurements, by sex and ethnicity

|                                                      | Dutch         |                 | South-Asian Surinamese |                 | African Surinamese |                 |
|------------------------------------------------------|---------------|-----------------|------------------------|-----------------|--------------------|-----------------|
|                                                      | Men (n=1,873) | Women (n=2,293) | Men (n=1,125)          | Women (n=1,464) | Men (n=1,411)      | Women (n=2,266) |
| Age (years)                                          | 45.8 (13.6)   | 44.8 (14.0)     | 42.6 (13.2)            | 45.0 (13.1)     | 47.2 (12.9)        | 47.1 (12.3)     |
| Family history of CVD<br>(missing: n=217*)           | 418 (22.4)    | 536 (23.5)      | 399 (35.8)             | 583 (40.5)      | 231 (16.5)         | 473 (21.2)      |
| Smoker                                               |               |                 |                        |                 |                    |                 |
| Current                                              | 477 (25.5)    | 532 (23.2)      | 432 (38.4)             | 277 (18.9)      | 597 (42.3)         | 548 (24.2)      |
| Past                                                 | 722 (38.5)    | 842 (36.7)      | 177 (15.7)             | 159 (10.9)      | 291 (20.6)         | 400 (17.7)      |
| Never                                                | 674 (36.0)    | 919 (40.1)      | 516 (45.9)             | 1,028 (70.2)    | 523 (37.1)         | 1,318 (58.2)    |
| Pack-years of smoking<br>(missing: n=191*)           | 3.4 (10.6)    | 2.9 (9.7)       | 8.9 (26.9)             | 1.7 (5.9)       | 8.3 (20.3)         | 2.5 (9.8)       |
| Achieving physical activity norm<br>(missing: n=27*) | 1,365 (72.9)  | 1,792 (78.2)    | 645 (57.5)             | 729 (49.9)      | 983 (69.8)         | 1,270 (56.1)    |
| Alcohol consumption<br>(missing: n=115*)             |               |                 |                        |                 |                    |                 |
| None or low                                          | 721 (38.6)    | 774 (33.9)      | 880 (78.6)             | 1,261 (86.7)    | 1,056 (75.6)       | 1,883 (83.7)    |
| Moderate                                             | 884 (47.3)    | 925 (40.5)      | 151 (13.5)             | 149 (10.2)      | 260 (18.6)         | 278 (12.4)      |



|                                                   |              |              |              |              |              |              |
|---------------------------------------------------|--------------|--------------|--------------|--------------|--------------|--------------|
| High                                              | 264 (14.1)   | 587 (25.7)   | 89 (7.9)     | 44 (3.0)     | 80 (5.7)     | 89 (4.0)     |
| BMI (kg/m <sup>2</sup> ; missing: n=15*)          | 25.0 (3.7)   | 24.2 (4.3)   | 25.7 (4.1)   | 26.4 (5.2)   | 26.2 (4.3)   | 28.6 (5.9)   |
| CKD risk (missing: n=63*)                         |              |              |              |              |              |              |
| Low                                               | 1,804 (96.8) | 2,216 (96.9) | 1,046 (93.2) | 1,365 (93.5) | 1,344 (95.5) | 2,139 (94.6) |
| Moderate                                          | 49 (2.6)     | 64 (2.8)     | 62 (5.5)     | 78 (5.3)     | 53 (3.8)     | 100 (4.4)    |
| High                                              | 10 (0.5)     | 7 (0.3)      | 14 (1.2)     | 17 (1.2)     | 11 (0.8)     | 21 (0.9)     |
| Hypertension                                      | 618 (33.0)   | 471 (20.5)   | 429 (38.1)   | 527 (36.0)   | 660 (46.8)   | 1,072 (47.3) |
| Hypercholesterolemia                              | 1,314 (70.2) | 1,374 (59.9) | 934 (83.0)   | 1,120 (76.5) | 889 (63.0)   | 1,447 (63.9) |
| Diabetes                                          | 76 (4.1)     | 40 (1.7)     | 190 (16.9)   | 209 (14.3)   | 149 (10.6)   | 237 (10.5)   |
| Use of psychotropic medication<br>(missing: n=4*) | 88 (4.7)     | 190 (8.3)    | 57 (5.1)     | 100 (6.8)    | 53 (3.8)     | 105 (4.6)    |

|                                            | Ghanaian    |                 | Turkish       |                 | Moroccan      |                 |
|--------------------------------------------|-------------|-----------------|---------------|-----------------|---------------|-----------------|
|                                            | Men (n=822) | Women (n=1,321) | Men (n=1,451) | Women (n=1,769) | Men (n=1,407) | Women (n=2,256) |
| Age (years)                                | 46.3 (11.6) | 43.0 (10.7)     | 39.8 (11.9)   | 39.1 (12.0)     | 41.6 (12.7)   | 39.1 (12.8)     |
| Family history of CVD<br>(missing: n=217*) | 36 (4.4)    | 53 (4.1)        | 382 (26.7)    | 615 (35.2)      | 171 (12.3)    | 351 (15.8)      |
| Smoker                                     |             |                 |               |                 |               |                 |
| Current                                    | 60 (7.3)    | 32 (2.4)        | 602 (41.5)    | 521 (29.5)      | 371 (26.4)    | 122 (5.4)       |

|    |                                          |            |              |              |              |              |              |
|----|------------------------------------------|------------|--------------|--------------|--------------|--------------|--------------|
| 1  |                                          |            |              |              |              |              |              |
| 2  |                                          |            |              |              |              |              |              |
| 3  | Past                                     | 102 (12.4) | 66 (5.0)     | 354 (24.4)   | 207 (11.7)   | 375 (26.7)   | 79 (3.5)     |
| 4  |                                          |            |              |              |              |              |              |
| 5  | Never                                    | 660 (80.3) | 1,223 (92.6) | 495 (34.1)   | 1,041 (58.8) | 661 (47.0)   | 2,055 (91.1) |
| 6  |                                          |            |              |              |              |              |              |
| 7  | Pack-years of smoking                    | 0.6 (4.2)  | 0.2 (2.3)    | 6.9 (14.8)   | 2.9 (7.2)    | 3.8 (9.9)    | 0.3 (1.9)    |
| 8  |                                          |            |              |              |              |              |              |
| 9  | (missing: n=191*)                        |            |              |              |              |              |              |
| 10 |                                          |            |              |              |              |              |              |
| 11 | Achieving physical activity norm         | 516 (62.8) | 626 (47.4)   | 720 (49.8)   | 618 (35.0)   | 791 (56.4)   | 928 (41.2)   |
| 12 |                                          |            |              |              |              |              |              |
| 13 | (missing: n=27*)                         |            |              |              |              |              |              |
| 14 |                                          |            |              |              |              |              |              |
| 15 | Alcohol consumption                      |            |              |              |              |              |              |
| 16 |                                          |            |              |              |              |              |              |
| 17 | (missing: n=115*)                        |            |              |              |              |              |              |
| 18 |                                          |            |              |              |              |              |              |
| 19 | None or low                              | 711 (87.6) | 1,184 (90.5) | 1,291 (89.8) | 1,679 (95.3) | 1,322 (94.4) | 2,204 (98.0) |
| 20 |                                          |            |              |              |              |              |              |
| 21 | Moderate                                 | 98 (12.1)  | 103 (7.9)    | 87 (6.1)     | 62 (3.5)     | 46 (3.3)     | 32 (1.4)     |
| 22 |                                          |            |              |              |              |              |              |
| 23 | High                                     | 3 (0.4)    | 22 (1.7)     | 59 (4.1)     | 20 (1.1)     | 33 (2.4)     | 12 (0.5)     |
| 24 |                                          |            |              |              |              |              |              |
| 25 | BMI (kg/m <sup>2</sup> ; missing: n=15*) | 26.6 (3.6) | 29.5 (5.3)   | 27.7 (4.4)   | 28.9 (6.5)   | 26.7 (4.0)   | 28.0 (5.7)   |
| 26 |                                          |            |              |              |              |              |              |
| 27 | CKD risk (missing: n=63*)                |            |              |              |              |              |              |
| 28 |                                          |            |              |              |              |              |              |
| 29 | Low                                      | 770 (94.2) | 1,213 (92.2) | 1,379 (95.4) | 1,645 (93.3) | 1,341 (95.7) | 2,111 (93.7) |
| 30 |                                          |            |              |              |              |              |              |
| 31 | Moderate                                 | 37 (4.5)   | 87 (6.6)     | 57 (3.9)     | 106 (6.0)    | 46 (3.3)     | 120 (5.3)    |
| 32 |                                          |            |              |              |              |              |              |
| 33 | High                                     | 10 (1.2)   | 16 (1.2)     | 9 (0.6)      | 12 (0.7)     | 14 (1.0)     | 22 (1.0)     |
| 34 |                                          |            |              |              |              |              |              |
| 35 | Hypertension                             | 494 (60.1) | 673 (50.9)   | 427 (29.4)   | 407 (23.0)   | 398 (28.3)   | 444 (19.7)   |
| 36 |                                          |            |              |              |              |              |              |
| 37 | Hypercholesterolemia                     | 551 (67.0) | 792 (60.0)   | 1,120 (77.2) | 1,130 (63.9) | 944 (67.1)   | 1,284 (56.9) |
| 38 |                                          |            |              |              |              |              |              |
| 39 |                                          |            |              |              |              |              |              |
| 40 |                                          |            |              |              |              |              |              |
| 41 |                                          |            |              |              |              |              |              |
| 42 |                                          |            |              |              |              |              |              |
| 43 |                                          |            |              |              |              |              |              |
| 44 |                                          |            |              |              |              |              |              |
| 45 |                                          |            |              |              |              |              |              |
| 46 |                                          |            |              |              |              |              |              |

|   |                                |            |           |           |           |            |           |
|---|--------------------------------|------------|-----------|-----------|-----------|------------|-----------|
| 1 |                                |            |           |           |           |            |           |
| 2 |                                |            |           |           |           |            |           |
| 3 | Diabetes                       | 115 (14.0) | 110 (8.3) | 138 (9.5) | 134 (7.6) | 161 (11.4) | 222 (9.8) |
| 4 |                                |            |           |           |           |            |           |
| 5 | Use of psychotropic medication | 24 (2.9)   | 41 (3.1)  | 88 (6.1)  | 139 (7.9) | 87 (6.2)   | 104 (4.6) |
| 6 |                                |            |           |           |           |            |           |
| 7 | (missing: n=4*)                |            |           |           |           |            |           |
| 8 |                                |            |           |           |           |            |           |

---

9 Data are presented as means (standard deviations) or frequencies (percentages).

10  
11 BMI, body mass index; CKD, chronic kidney disease; CVD, cardiovascular disease.

12  
13 \* From total study population (n=19,458).

14  
15  
16  
17  
18  
19  
20  
21  
22  
23  
24  
25  
26  
27  
28  
29  
30  
31  
32  
33  
34  
35  
36  
37  
38  
39  
40  
41  
42  
43  
44  
45  
46

For peer review only

**Appendix Table 3.** Number of cases and age-adjusted prevalence of any minor ECG abnormality by sex in the total population and by ethnic group, and the odds of minor ECG abnormalities in women compared to men, overall and with an interaction term for sex and ethnicity

|                    | Men<br>(n of<br>cases, % <sup>a</sup> ) | Women<br>(n of<br>cases, % <sup>a</sup> ) | Model 1                       |                 |                           |                 | Model 2                       |                 |                           |                 |
|--------------------|-----------------------------------------|-------------------------------------------|-------------------------------|-----------------|---------------------------|-----------------|-------------------------------|-----------------|---------------------------|-----------------|
|                    |                                         |                                           | OR (95% CI)                   | <i>p</i> -value | Ratio of ORs<br>(95% CI)* | <i>p</i> -value | OR (95% CI)                   | <i>p</i> -value | Ratio of ORs<br>(95% CI)* | <i>p</i> -value |
| Overall            | 3,227<br>(39.8)                         | 2,684<br>(23.8)                           | 0.45 (0.42-0.48) <sup>b</sup> | <0.001          | NA                        | NA              | 0.46 (0.43-0.49) <sup>b</sup> | <0.001          | NA                        | NA              |
| Dutch              | 829 (44.3)                              | 636 (27.6)                                | 0.49 (0.43-0.55)              | <0.001          | Reference                 | NA              | 0.50 (0.44-0.57)              | <0.001          | Reference                 | NA              |
| SA Surinamese      | 316 (28.5)                              | 269 (17.9)                                | 0.56 (0.46-0.67)              | <0.001          | 1.15 (0.92-1.44)          | 0.22            | 0.57 (0.47-0.68)              | <0.001          | 1.13 (0.90-1.42)          | 0.28            |
| African Surinamese | 647 (45.5)                              | 638 (28.4)                                | 0.46 (0.40-0.53)              | <0.001          | 0.95 (0.78-1.15)          | 0.59            | 0.46 (0.40-0.53)              | <0.001          | 0.93 (0.76-1.12)          | 0.43            |
| Ghanaian           | 455 (55.7)                              | 452 (35.6)                                | 0.43 (0.36-0.52)              | <0.001          | 0.89 (0.72-1.11)          | 0.31            | 0.44 (0.36-0.52)              | <0.001          | 0.87 (0.70-1.09)          | 0.22            |
| Turkish            | 468 (32.4)                              | 283 (16.2)                                | 0.40 (0.34-0.48)              | <0.001          | 0.83 (0.67-1.02)          | 0.08            | 0.40 (0.34-0.47)              | <0.001          | 0.80 (0.64-0.99)          | 0.04            |
| Moroccan           | 512 (36.5)                              | 406 (18.3)                                | 0.39 (0.34-0.46)              | <0.001          | 0.81 (0.66-0.99)          | 0.04            | 0.39 (0.34-0.46)              | <0.001          | 0.78 (0.64-0.96)          | 0.02            |

CI, confidence interval; NA, not applicable; OR, odds ratio; SA, South-Asian.

Significant *p*-values (*p*<0.05) are printed in italic.

Model 1: adjusted for age.

Model 2: adjusted for age, hypertension, hypercholesterolemia, diabetes, and smoking status.

<sup>a</sup> Age-adjusted prevalence.

1  
2  
3  
4  
5  
6  
7  
8  
9  
10  
11  
12  
13  
14  
15  
16  
17  
18  
19  
20  
21  
22  
23  
24  
25  
26  
27  
28  
29  
30  
31  
32  
33  
34  
35  
36  
37  
38  
39  
40  
41  
42  
43  
44  
45  
46

<sup>b</sup> Additionally adjusted for ethnicity.

\* Measure of effect modification on multiplicative scale (statistical interaction term).

For peer review only

**Appendix Table 4a.** Age-adjusted prevalence of a selection of common ECG abnormalities (for majors: prevalence  $\geq 1\%$  in total study population; for minors: top 5 of abnormalities with highest prevalence in total study population), shown by major and minor ECG abnormality categories, by sex and ethnicity, ordered by highest to lowest overall prevalence

|                               | Major ECG abnormalities |                                  |              | Minor ECG abnormalities |                                                                 |                                                       |                                                     |
|-------------------------------|-------------------------|----------------------------------|--------------|-------------------------|-----------------------------------------------------------------|-------------------------------------------------------|-----------------------------------------------------|
|                               | T-wave abnormalities    | ECG suggestive of cardiomyopathy | LVH          | Sinus bradycardia       | 1 <sup>st</sup> degree atrioventricular conduction disturbances | Mild ventricular conduction disturbances <sup>a</sup> | Mildly prolonged QTc (Bazett) interval <sup>b</sup> |
| <i>All</i>                    |                         |                                  |              |                         |                                                                 |                                                       |                                                     |
| Men                           | 133 (1.6)               | 90 (1.1)                         | 1,088 (13.5) | 723 (9.0)               | 532 (6.5)                                                       | 609 (7.5)                                             | 173 (2.1)                                           |
| Women                         | 137 (1.2)               | 124 (1.1)                        | 986 (8.8)    | 473 (4.2)               | 344 (3.1)                                                       | 133 (1.2)                                             | 393 (3.5)                                           |
| <i>Dutch</i>                  |                         |                                  |              |                         |                                                                 |                                                       |                                                     |
| Men                           | 7 (0.4)                 | 10 (0.5)                         | 181 (9.8)    | 269 (14.3)              | 121 (6.3)                                                       | 254 (13.6)                                            | 57 (3.0)                                            |
| Women                         | 12 (0.5)                | 15 (0.6)                         | 114 (5.0)    | 218 (9.4)               | 72 (3.1)                                                        | 55 (2.4)                                              | 69 (3.1)                                            |
| <i>South-Asian Surinamese</i> |                         |                                  |              |                         |                                                                 |                                                       |                                                     |
| Men                           | 17 (1.9)                | 13 (1.2)                         | 79 (7.2)     | 78 (6.9)                | 36 (3.4)                                                        | 42 (3.9)                                              | 23 (2.1)                                            |
| Women                         | 23 (1.5)                | 28 (1.9)                         | 100 (6.5)    | 40 (2.8)                | 22 (1.5)                                                        | 3 (0.2)                                               | 56 (3.6)                                            |

|                           | Major ECG abnormalities |                                  | Minor ECG abnormalities |                   |                                                                 |                                                       |                                                     |
|---------------------------|-------------------------|----------------------------------|-------------------------|-------------------|-----------------------------------------------------------------|-------------------------------------------------------|-----------------------------------------------------|
|                           | T-wave abnormalities    | ECG suggestive of cardiomyopathy | LVH                     | Sinus bradycardia | 1 <sup>st</sup> degree atrioventricular conduction disturbances | Mild ventricular conduction disturbances <sup>a</sup> | Mildly prolonged QTc (Bazett) interval <sup>b</sup> |
| <i>African Surinamese</i> |                         |                                  |                         |                   |                                                                 |                                                       |                                                     |
| Men                       | 50 (3.5)                | 38 (2.7)                         | 288 (20.3)              | 124 (8.8)         | 137 (9.5)                                                       | 62 (4.3)                                              | 33 (2.3)                                            |
| Women                     | 47 (2.1)                | 41 (1.9)                         | 340 (15.1)              | 63 (2.8)          | 102 (4.5)                                                       | 16 (0.7)                                              | 94 (4.2)                                            |
| <i>Ghanaian</i>           |                         |                                  |                         |                   |                                                                 |                                                       |                                                     |
| Men                       | 40 (4.3)                | 11 (1.2)                         | 293 (35.5)              | 41 (5.4)          | 103 (12.9)                                                      | 22 (2.5)                                              | 9 (1.1)                                             |
| Women                     | 32 (2.7)                | 25 (2.1)                         | 266 (21.3)              | 42 (3.4)          | 79 (6.1)                                                        | 7 (0.6)                                               | 29 (2.5)                                            |
| <i>Turkish</i>            |                         |                                  |                         |                   |                                                                 |                                                       |                                                     |
| Men                       | 13 (0.9)                | 10 (0.7)                         | 87 (6.0)                | 89 (6.2)          | 55 (3.8)                                                        | 118 (8.2)                                             | 37 (2.5)                                            |
| Women                     | 11 (0.7)                | 7 (0.4)                          | 58 (3.3)                | 36 (2.0)          | 23 (1.3)                                                        | 23 (1.4)                                              | 69 (3.9)                                            |
| <i>Moroccan</i>           |                         |                                  |                         |                   |                                                                 |                                                       |                                                     |
| Men                       | 6 (0.4)                 | 8 (0.5)                          | 160 (11.5)              | 122 (9.1)         | 80 (5.3)                                                        | 111 (7.8)                                             | 14 (0.9)                                            |
| Women                     | 12 (0.6)                | 8 (0.4)                          | 108 (4.9)               | 74 (3.2)          | 46 (2.1)                                                        | 29 (1.3)                                              | 76 (3.6)                                            |

Data are reported in n (%). ECG, electrocardiogram.

<sup>a</sup> 110≤QRS<120ms; <sup>b</sup> men: QTc >450ms, women: QTc ≥460ms.

**Appendix Table 4b.** Age-adjusted prevalence of less common ECG abnormalities (for majors: prevalence <1% in total study population; for minors: abnormalities not in top 5 with highest prevalence in total study population), shown by major and minor ECG abnormality categories, by sex, ordered by highest to lowest overall prevalence

|                                                              | Men       | Women     |
|--------------------------------------------------------------|-----------|-----------|
| <b>Major ECG abnormalities</b>                               |           |           |
| Microvoltages                                                | 38 (0.5)  | 138 (1.2) |
| Right bundle branch block (RBBB)                             | 117 (1.4) | 38 (0.3)  |
| Severely prolonged QTc (Bazett) interval <sup>a</sup>        | 59 (0.7)  | 91 (0.8)  |
| Nonspecific ventricular conduction disturbances <sup>b</sup> | 87 (1.1)  | 10 (0.1)  |
| Pathological Q waves                                         | 50 (0.6)  | 32 (0.3)  |
| Left bundle branch block (LBBB)                              | 20 (0.2)  | 36 (0.3)  |
| Ventricular preexcitation                                    | 27 (0.3)  | 16 (0.1)  |
| Extreme axis deviation                                       | 15 (0.2)  | 7 (0.06)  |
| Atrial fibrillation or flutter                               | 8 (0.1)   | 5 (0.05)  |
| Miscellaneous <sup>c</sup>                                   | 7 (0.08)  | 2 (0.02)  |
| Severely shortened QTc (Bazett) interval <sup>d</sup>        | 3 (0.04)  | 2 (0.02)  |
| Ventricular rhythm                                           | 2 (0.02)  | 1 (0.01)  |
| 2nd degree atrioventricular conduction disturbances          | 3 (0.04)  | 0         |
| Sinus bradycardia + idioventricular rhythm                   | 2 (0.02)  | 0         |
| 3rd degree atrioventricular conduction disturbances          | 0         | 0         |
| <b>Minor ECG abnormalities</b>                               |           |           |
| Left axis deviation                                          | 371 (4.5) | 207 (1.9) |
| Right axis deviation                                         | 222 (2.8) | 120 (1.1) |
| Possible pathological Q waves                                | 172 (2.1) | 111 (1.0) |
| Frequent PACs and/or PVCs                                    | 99 (1.2)  | 118 (1.1) |
| Atrial rhythm                                                | 79 (1.0)  | 130 (1.1) |
| Mildly shortened QTc (Bazett) interval <sup>e</sup>          | 1.7 (1.4) | 100 (0.9) |



|                                       | Men      | Women    |
|---------------------------------------|----------|----------|
| Left anterior fascicular block (LAFB) | 61 (0.7) | 32 (0.3) |
| Sinus tachycardia                     | 23 (0.3) | 37 (0.3) |
| Atrial abnormalities                  | 32 (0.4) | 27 (0.2) |
| Indeterminate heart axis              | 9 (0.1)  | 4 (0.03) |

Data are reported in n (%).

ECG, electrocardiogram; PAC, premature atrial contraction; PVC, premature ventricular contraction.

<sup>a</sup> men: QTc >470ms, women: QTc ≥480ms;

<sup>b</sup> QRS duration ≥120ms.

<sup>c</sup> Including ECG suggestive of Brugada syndrome.

<sup>d</sup> men: QTc <330ms, women: QTc <340ms.

<sup>e</sup> men: QTc <360ms, women: QTc <370ms

**STROBE 2007 (v4) Statement—Checklist of items that should be included in reports of *cross-sectional studies***

| Section/Topic                | Item # | Recommendation                                                                                                                                                                       | Reported on page # |
|------------------------------|--------|--------------------------------------------------------------------------------------------------------------------------------------------------------------------------------------|--------------------|
| <b>Title and abstract</b>    | 1      | (a) Indicate the study's design with a commonly used term in the title or the abstract                                                                                               | 1                  |
|                              |        | (b) Provide in the abstract an informative and balanced summary of what was done and what was found                                                                                  | 2, 3               |
| <b>Introduction</b>          |        |                                                                                                                                                                                      |                    |
| Background/rationale         | 2      | Explain the scientific background and rationale for the investigation being reported                                                                                                 | 6                  |
| Objectives                   | 3      | State specific objectives, including any prespecified hypotheses                                                                                                                     | 7                  |
| <b>Methods</b>               |        |                                                                                                                                                                                      |                    |
| Study design                 | 4      | Present key elements of study design early in the paper                                                                                                                              | 8                  |
| Setting                      | 5      | Describe the setting, locations, and relevant dates, including periods of recruitment, exposure, follow-up, and data collection                                                      | 8                  |
| Participants                 | 6      | (a) Give the eligibility criteria, and the sources and methods of selection of participants                                                                                          | 8, 10              |
| Variables                    | 7      | Clearly define all outcomes, exposures, predictors, potential confounders, and effect modifiers. Give diagnostic criteria, if applicable                                             | 8, 9               |
| Data sources/<br>measurement | 8*     | For each variable of interest, give sources of data and details of methods of assessment (measurement). Describe comparability of assessment methods if there is more than one group | 8, 9               |
| Bias                         | 9      | Describe any efforts to address potential sources of bias                                                                                                                            | 8, 10, 11          |
| Study size                   | 10     | Explain how the study size was arrived at                                                                                                                                            | 10                 |
| Quantitative variables       | 11     | Explain how quantitative variables were handled in the analyses. If applicable, describe which groupings were chosen and why                                                         | 8-11               |
| Statistical methods          | 12     | (a) Describe all statistical methods, including those used to control for confounding                                                                                                | 10, 11             |
|                              |        | (b) Describe any methods used to examine subgroups and interactions                                                                                                                  | 10, 11             |
|                              |        | (c) Explain how missing data were addressed                                                                                                                                          | 10                 |
|                              |        | (d) If applicable, describe analytical methods taking account of sampling strategy                                                                                                   | NA                 |
|                              |        | (e) Describe any sensitivity analyses                                                                                                                                                | 11                 |
| <b>Results</b>               |        |                                                                                                                                                                                      |                    |

|                          |     |                                                                                                                                                                                                              |                                        |
|--------------------------|-----|--------------------------------------------------------------------------------------------------------------------------------------------------------------------------------------------------------------|----------------------------------------|
| Participants             | 13* | (a) Report numbers of individuals at each stage of study—eg numbers potentially eligible, examined for eligibility, confirmed eligible, included in the study, completing follow-up, and analysed            | 10                                     |
|                          |     | (b) Give reasons for non-participation at each stage                                                                                                                                                         | NA                                     |
|                          |     | (c) Consider use of a flow diagram                                                                                                                                                                           |                                        |
| Descriptive data         | 14* | (a) Give characteristics of study participants (eg demographic, clinical, social) and information on exposures and potential confounders                                                                     | 13                                     |
|                          |     | (b) Indicate number of participants with missing data for each variable of interest                                                                                                                          | 13, 14                                 |
| Outcome data             | 15* | Report numbers of outcome events or summary measures                                                                                                                                                         | 14, 16-19                              |
| Main results             | 16  | (a) Give unadjusted estimates and, if applicable, confounder-adjusted estimates and their precision (eg, 95% confidence interval). Make clear which confounders were adjusted for and why they were included | Table 2, Table 3, and Appendix Table 3 |
|                          |     | (b) Report category boundaries when continuous variables were categorized                                                                                                                                    | 17, 18                                 |
|                          |     | (c) If relevant, consider translating estimates of relative risk into absolute risk for a meaningful time period                                                                                             | NA                                     |
| Other analyses           | 17  | Report other analyses done—eg analyses of subgroups and interactions, and sensitivity analyses                                                                                                               | 15-19                                  |
| <b>Discussion</b>        |     |                                                                                                                                                                                                              |                                        |
| Key results              | 18  | Summarise key results with reference to study objectives                                                                                                                                                     | 20                                     |
| Limitations              | 19  | Discuss limitations of the study, taking into account sources of potential bias or imprecision. Discuss both direction and magnitude of any potential bias                                                   | 20, 21                                 |
| Interpretation           | 20  | Give a cautious overall interpretation of results considering objectives, limitations, multiplicity of analyses, results from similar studies, and other relevant evidence                                   | 21-24                                  |
| Generalisability         | 21  | Discuss the generalisability (external validity) of the study results                                                                                                                                        | 20                                     |
| <b>Other information</b> |     |                                                                                                                                                                                                              |                                        |
| Funding                  | 22  | Give the source of funding and the role of the funders for the present study and, if applicable, for the original study on which the present article is based                                                | 25                                     |

\*Give information separately for cases and controls in case-control studies and, if applicable, for exposed and unexposed groups in cohort and cross-sectional studies.

**Note:** An Explanation and Elaboration article discusses each checklist item and gives methodological background and published examples of transparent reporting. The STROBE checklist is best used in conjunction with this article (freely available on the Web sites of PLoS Medicine at <http://www.plosmedicine.org/>, Annals of Internal Medicine at <http://www.annals.org/>, and Epidemiology at <http://www.epidem.com/>). Information on the STROBE Initiative is available at [www.strobe-statement.org](http://www.strobe-statement.org).
