# Supplementary material for: Do sex differences in the prevalence of ECG abnormalities vary across ethnic groups living in the Netherlands? A cross-sectional analysis of the population-based HELIUS study
Source: PubMed Central journal article supplement (PMC7473628; doi:10.1136/bmjopen-2020-039091), 2020-09-03
Supplement: bmjopen-2020-039091supp001.pdf [file bmjopen-2020-039091supp001.pdf]

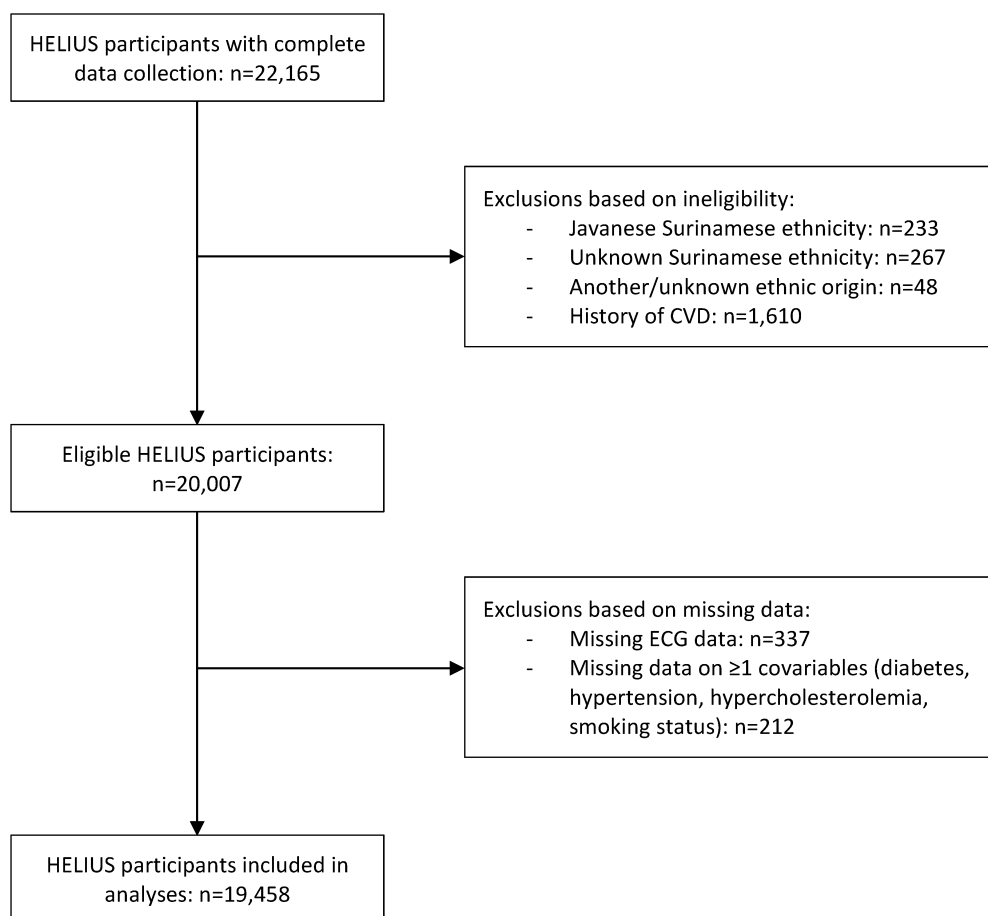

**Appendix Figure 1.** Flow diagram of the study population
