# Supplementary material for: Do sex differences in the prevalence of ECG abnormalities vary across ethnic groups living in the Netherlands? A cross-sectional analysis of the population-based HELIUS study
Source: PubMed Central journal article supplement (PMC7473628; doi:10.1136/bmjopen-2020-039091), 2020-09-03
Supplement: bmjopen-2020-039091supp002.pdf [file bmjopen-2020-039091supp002.pdf]

**Appendix Table 1.** Classification of major and minor ECG abnormalities

---

| <b>Major ECG abnormalities</b>                                                           |
|------------------------------------------------------------------------------------------|
| Atrial fibrillation or flutter                                                           |
| Ventricular rhythm                                                                       |
| Sinus bradycardia + idioventricular rhythm                                               |
| 2 <sup>nd</sup> degree atrioventricular conduction disturbances                          |
| 3 <sup>rd</sup> degree atrioventricular conduction disturbances                          |
| Ventricular preexcitation                                                                |
| Left bundle branch block (LBBB)                                                          |
| Right bundle branch block (RBBB)                                                         |
| Nonspecific ventricular conduction disturbances (QRS duration $\geq 120$ ms)             |
| Severely prolonged QTc (Bazett) interval (men: QTc $> 470$ ms, women: QTc $\geq 480$ ms) |
| Severely shortened QTc (Bazett) interval (men: QTc $< 330$ ms, women: QTc $< 340$ ms)    |
| Extreme axis deviation                                                                   |
| Pathological Q waves                                                                     |
| Microvoltages                                                                            |
| T-wave abnormalities                                                                     |
| ECG suggestive of cardiomyopathy                                                         |
| Miscellaneous (including ECG suggestive of Brugada syndrome)                             |

---

| <b>Minor ECG abnormalities</b>                                                                                            |
|---------------------------------------------------------------------------------------------------------------------------|
| Sinus tachycardia                                                                                                         |
| Sinus bradycardia                                                                                                         |
| Atrial rhythm                                                                                                             |
| Frequent premature atrial contractions (PACs) and/or premature ventricular contractions (PVCs)                            |
| Atrial abnormalities                                                                                                      |
| 1 <sup>st</sup> degree atrioventricular conduction disturbances                                                           |
| Left anterior fascicular block (LAFB)                                                                                     |
| Mild ( $110 \leq \text{QRS} < 120$ ms) ventricular conduction disturbances, including incomplete LBBB and incomplete RBBB |

---

Mildly prolonged QTc (Bazett) interval (men: QTc >450ms, women: QTc ≥460ms)

Mildly shortened QTc (Bazett) interval (men: QTc <360ms, women: QTc <370ms)

Left axis deviation

Right axis deviation

Indeterminate heart axis

Possible pathological Q waves

Left ventricular hypertrophy (LVH)

---

ECG, electrocardiogram.

**Appendix Table 2.** Baseline characteristics of 19,548 participants with ECG measurements, by sex and ethnicity

|                                                      | Dutch         |                 | South-Asian Surinamese |                 | African Surinamese |                 |
|------------------------------------------------------|---------------|-----------------|------------------------|-----------------|--------------------|-----------------|
|                                                      | Men (n=1,873) | Women (n=2,293) | Men (n=1,125)          | Women (n=1,464) | Men (n=1,411)      | Women (n=2,266) |
| Age (years)                                          | 45.8 (13.6)   | 44.8 (14.0)     | 42.6 (13.2)            | 45.0 (13.1)     | 47.2 (12.9)        | 47.1 (12.3)     |
| Family history of CVD<br>(missing: n=217*)           | 418 (22.4)    | 536 (23.5)      | 399 (35.8)             | 583 (40.5)      | 231 (16.5)         | 473 (21.2)      |
| Smoker                                               |               |                 |                        |                 |                    |                 |
| Current                                              | 477 (25.5)    | 532 (23.2)      | 432 (38.4)             | 277 (18.9)      | 597 (42.3)         | 548 (24.2)      |
| Past                                                 | 722 (38.5)    | 842 (36.7)      | 177 (15.7)             | 159 (10.9)      | 291 (20.6)         | 400 (17.7)      |
| Never                                                | 674 (36.0)    | 919 (40.1)      | 516 (45.9)             | 1,028 (70.2)    | 523 (37.1)         | 1,318 (58.2)    |
| Pack-years of smoking<br>(missing: n=191*)           | 3.4 (10.6)    | 2.9 (9.7)       | 8.9 (26.9)             | 1.7 (5.9)       | 8.3 (20.3)         | 2.5 (9.8)       |
| Achieving physical activity norm<br>(missing: n=27*) | 1,365 (72.9)  | 1,792 (78.2)    | 645 (57.5)             | 729 (49.9)      | 983 (69.8)         | 1,270 (56.1)    |
| Alcohol consumption<br>(missing: n=115*)             |               |                 |                        |                 |                    |                 |
| None or low                                          | 721 (38.6)    | 774 (33.9)      | 880 (78.6)             | 1,261 (86.7)    | 1,056 (75.6)       | 1,883 (83.7)    |
| Moderate                                             | 884 (47.3)    | 925 (40.5)      | 151 (13.5)             | 149 (10.2)      | 260 (18.6)         | 278 (12.4)      |

|                                                   |              |              |              |              |              |              |
|---------------------------------------------------|--------------|--------------|--------------|--------------|--------------|--------------|
| High                                              | 264 (14.1)   | 587 (25.7)   | 89 (7.9)     | 44 (3.0)     | 80 (5.7)     | 89 (4.0)     |
| BMI (kg/m <sup>2</sup> ; missing: n=15*)          | 25.0 (3.7)   | 24.2 (4.3)   | 25.7 (4.1)   | 26.4 (5.2)   | 26.2 (4.3)   | 28.6 (5.9)   |
| CKD risk (missing: n=63*)                         |              |              |              |              |              |              |
| Low                                               | 1,804 (96.8) | 2,216 (96.9) | 1,046 (93.2) | 1,365 (93.5) | 1,344 (95.5) | 2,139 (94.6) |
| Moderate                                          | 49 (2.6)     | 64 (2.8)     | 62 (5.5)     | 78 (5.3)     | 53 (3.8)     | 100 (4.4)    |
| High                                              | 10 (0.5)     | 7 (0.3)      | 14 (1.2)     | 17 (1.2)     | 11 (0.8)     | 21 (0.9)     |
| Hypertension                                      | 618 (33.0)   | 471 (20.5)   | 429 (38.1)   | 527 (36.0)   | 660 (46.8)   | 1,072 (47.3) |
| Hypercholesterolemia                              | 1,314 (70.2) | 1,374 (59.9) | 934 (83.0)   | 1,120 (76.5) | 889 (63.0)   | 1,447 (63.9) |
| Diabetes                                          | 76 (4.1)     | 40 (1.7)     | 190 (16.9)   | 209 (14.3)   | 149 (10.6)   | 237 (10.5)   |
| Use of psychotropic medication<br>(missing: n=4*) | 88 (4.7)     | 190 (8.3)    | 57 (5.1)     | 100 (6.8)    | 53 (3.8)     | 105 (4.6)    |

|                                            | Ghanaian    |                 | Turkish       |                 | Moroccan      |                 |
|--------------------------------------------|-------------|-----------------|---------------|-----------------|---------------|-----------------|
|                                            | Men (n=822) | Women (n=1,321) | Men (n=1,451) | Women (n=1,769) | Men (n=1,407) | Women (n=2,256) |
| Age (years)                                | 46.3 (11.6) | 43.0 (10.7)     | 39.8 (11.9)   | 39.1 (12.0)     | 41.6 (12.7)   | 39.1 (12.8)     |
| Family history of CVD<br>(missing: n=217*) | 36 (4.4)    | 53 (4.1)        | 382 (26.7)    | 615 (35.2)      | 171 (12.3)    | 351 (15.8)      |
| Smoker                                     |             |                 |               |                 |               |                 |
| Current                                    | 60 (7.3)    | 32 (2.4)        | 602 (41.5)    | 521 (29.5)      | 371 (26.4)    | 122 (5.4)       |

|                                                      |            |              |              |              |              |              |
|------------------------------------------------------|------------|--------------|--------------|--------------|--------------|--------------|
| Past                                                 | 102 (12.4) | 66 (5.0)     | 354 (24.4)   | 207 (11.7)   | 375 (26.7)   | 79 (3.5)     |
| Never                                                | 660 (80.3) | 1,223 (92.6) | 495 (34.1)   | 1,041 (58.8) | 661 (47.0)   | 2,055 (91.1) |
| Pack-years of smoking<br>(missing: n=191*)           | 0.6 (4.2)  | 0.2 (2.3)    | 6.9 (14.8)   | 2.9 (7.2)    | 3.8 (9.9)    | 0.3 (1.9)    |
| Achieving physical activity norm<br>(missing: n=27*) | 516 (62.8) | 626 (47.4)   | 720 (49.8)   | 618 (35.0)   | 791 (56.4)   | 928 (41.2)   |
| Alcohol consumption<br>(missing: n=115*)             |            |              |              |              |              |              |
| None or low                                          | 711 (87.6) | 1,184 (90.5) | 1,291 (89.8) | 1,679 (95.3) | 1,322 (94.4) | 2,204 (98.0) |
| Moderate                                             | 98 (12.1)  | 103 (7.9)    | 87 (6.1)     | 62 (3.5)     | 46 (3.3)     | 32 (1.4)     |
| High                                                 | 3 (0.4)    | 22 (1.7)     | 59 (4.1)     | 20 (1.1)     | 33 (2.4)     | 12 (0.5)     |
| BMI (kg/m <sup>2</sup> ; missing: n=15*)             | 26.6 (3.6) | 29.5 (5.3)   | 27.7 (4.4)   | 28.9 (6.5)   | 26.7 (4.0)   | 28.0 (5.7)   |
| CKD risk (missing: n=63*)                            |            |              |              |              |              |              |
| Low                                                  | 770 (94.2) | 1,213 (92.2) | 1,379 (95.4) | 1,645 (93.3) | 1,341 (95.7) | 2,111 (93.7) |
| Moderate                                             | 37 (4.5)   | 87 (6.6)     | 57 (3.9)     | 106 (6.0)    | 46 (3.3)     | 120 (5.3)    |
| High                                                 | 10 (1.2)   | 16 (1.2)     | 9 (0.6)      | 12 (0.7)     | 14 (1.0)     | 22 (1.0)     |
| Hypertension                                         | 494 (60.1) | 673 (50.9)   | 427 (29.4)   | 407 (23.0)   | 398 (28.3)   | 444 (19.7)   |
| Hypercholesterolemia                                 | 551 (67.0) | 792 (60.0)   | 1,120 (77.2) | 1,130 (63.9) | 944 (67.1)   | 1,284 (56.9) |

|                                |            |           |           |           |            |           |
|--------------------------------|------------|-----------|-----------|-----------|------------|-----------|
| Diabetes                       | 115 (14.0) | 110 (8.3) | 138 (9.5) | 134 (7.6) | 161 (11.4) | 222 (9.8) |
| Use of psychotropic medication | 24 (2.9)   | 41 (3.1)  | 88 (6.1)  | 139 (7.9) | 87 (6.2)   | 104 (4.6) |
| (missing: n=4*)                |            |           |           |           |            |           |

---

Data are presented as means (standard deviations) or frequencies (percentages).

BMI, body mass index; CKD, chronic kidney disease; CVD, cardiovascular disease.

\* From total study population (n=19,458).

**Appendix Table 3.** Number of cases and age-adjusted prevalence of any minor ECG abnormality by sex in the total population and by ethnic group, and the odds of minor ECG abnormalities in women compared to men, overall and with an interaction term for sex and ethnicity

|                    | Men<br>(n of<br>cases, % <sup>a</sup> ) | Women<br>(n of<br>cases, % <sup>a</sup> ) | Model 1                       |                  |                           |                 | Model 2                       |                  |                           |                 |
|--------------------|-----------------------------------------|-------------------------------------------|-------------------------------|------------------|---------------------------|-----------------|-------------------------------|------------------|---------------------------|-----------------|
|                    |                                         |                                           | OR (95% CI)                   | <i>p</i> -value  | Ratio of ORs<br>(95% CI)* | <i>p</i> -value | OR (95% CI)                   | <i>p</i> -value  | Ratio of ORs<br>(95% CI)* | <i>p</i> -value |
| Overall            | 3,227<br>(39.8)                         | 2,684<br>(23.8)                           | 0.45 (0.42-0.48) <sup>b</sup> | <i>&lt;0.001</i> | NA                        | NA              | 0.46 (0.43-0.49) <sup>b</sup> | <i>&lt;0.001</i> | NA                        | NA              |
| Dutch              | 829 (44.3)                              | 636 (27.6)                                | 0.49 (0.43-0.55)              | <i>&lt;0.001</i> | Reference                 | NA              | 0.50 (0.44-0.57)              | <i>&lt;0.001</i> | Reference                 | NA              |
| SA Surinamese      | 316 (28.5)                              | 269 (17.9)                                | 0.56 (0.46-0.67)              | <i>&lt;0.001</i> | 1.15 (0.92-1.44)          | 0.22            | 0.57 (0.47-0.68)              | <i>&lt;0.001</i> | 1.13 (0.90-1.42)          | 0.28            |
| African Surinamese | 647 (45.5)                              | 638 (28.4)                                | 0.46 (0.40-0.53)              | <i>&lt;0.001</i> | 0.95 (0.78-1.15)          | 0.59            | 0.46 (0.40-0.53)              | <i>&lt;0.001</i> | 0.93 (0.76-1.12)          | 0.43            |
| Ghanaian           | 455 (55.7)                              | 452 (35.6)                                | 0.43 (0.36-0.52)              | <i>&lt;0.001</i> | 0.89 (0.72-1.11)          | 0.31            | 0.44 (0.36-0.52)              | <i>&lt;0.001</i> | 0.87 (0.70-1.09)          | 0.22            |
| Turkish            | 468 (32.4)                              | 283 (16.2)                                | 0.40 (0.34-0.48)              | <i>&lt;0.001</i> | 0.83 (0.67-1.02)          | 0.08            | 0.40 (0.34-0.47)              | <i>&lt;0.001</i> | 0.80 (0.64-0.99)          | 0.04            |
| Moroccan           | 512 (36.5)                              | 406 (18.3)                                | 0.39 (0.34-0.46)              | <i>&lt;0.001</i> | 0.81 (0.66-0.99)          | 0.04            | 0.39 (0.34-0.46)              | <i>&lt;0.001</i> | 0.78 (0.64-0.96)          | 0.02            |

CI, confidence interval; NA, not applicable; OR, odds ratio; SA, South-Asian.

Significant *p*-values (*p*<0.05) are printed in italic.

Model 1: adjusted for age.

Model 2: adjusted for age, hypertension, hypercholesterolemia, diabetes, and smoking status.

<sup>a</sup> Age-adjusted prevalence.

<sup>b</sup> Additionally adjusted for ethnicity.

\* Measure of effect modification on multiplicative scale (statistical interaction term).



**Appendix Table 4a.** Age-adjusted prevalence of a selection of common ECG abnormalities (for majors: prevalence  $\geq 1\%$  in total study population; for minors: top 5 of abnormalities with highest prevalence in total study population), shown by major and minor ECG abnormality categories, by sex and ethnicity, ordered by highest to lowest overall prevalence

|                               | Major ECG abnormalities |                                  | Minor ECG abnormalities |                   |                                                                 |                                                       |                                                     |
|-------------------------------|-------------------------|----------------------------------|-------------------------|-------------------|-----------------------------------------------------------------|-------------------------------------------------------|-----------------------------------------------------|
|                               | T-wave abnormalities    | ECG suggestive of cardiomyopathy | LVH                     | Sinus bradycardia | 1 <sup>st</sup> degree atrioventricular conduction disturbances | Mild ventricular conduction disturbances <sup>a</sup> | Mildly prolonged QTc (Bazett) interval <sup>b</sup> |
| <i>All</i>                    |                         |                                  |                         |                   |                                                                 |                                                       |                                                     |
| Men                           | 133 (1.6)               | 90 (1.1)                         | 1,088 (13.5)            | 723 (9.0)         | 532 (6.5)                                                       | 609 (7.5)                                             | 173 (2.1)                                           |
| Women                         | 137 (1.2)               | 124 (1.1)                        | 986 (8.8)               | 473 (4.2)         | 344 (3.1)                                                       | 133 (1.2)                                             | 393 (3.5)                                           |
| <i>Dutch</i>                  |                         |                                  |                         |                   |                                                                 |                                                       |                                                     |
| Men                           | 7 (0.4)                 | 10 (0.5)                         | 181 (9.8)               | 269 (14.3)        | 121 (6.3)                                                       | 254 (13.6)                                            | 57 (3.0)                                            |
| Women                         | 12 (0.5)                | 15 (0.6)                         | 114 (5.0)               | 218 (9.4)         | 72 (3.1)                                                        | 55 (2.4)                                              | 69 (3.1)                                            |
| <i>South-Asian Surinamese</i> |                         |                                  |                         |                   |                                                                 |                                                       |                                                     |
| Men                           | 17 (1.9)                | 13 (1.2)                         | 79 (7.2)                | 78 (6.9)          | 36 (3.4)                                                        | 42 (3.9)                                              | 23 (2.1)                                            |
| Women                         | 23 (1.5)                | 28 (1.9)                         | 100 (6.5)               | 40 (2.8)          | 22 (1.5)                                                        | 3 (0.2)                                               | 56 (3.6)                                            |

|                           | Major ECG abnormalities |                                  | Minor ECG abnormalities |                   |                                                                 |                                                       |                                                     |
|---------------------------|-------------------------|----------------------------------|-------------------------|-------------------|-----------------------------------------------------------------|-------------------------------------------------------|-----------------------------------------------------|
|                           | T-wave abnormalities    | ECG suggestive of cardiomyopathy | LVH                     | Sinus bradycardia | 1 <sup>st</sup> degree atrioventricular conduction disturbances | Mild ventricular conduction disturbances <sup>a</sup> | Mildly prolonged QTc (Bazett) interval <sup>b</sup> |
| <i>African Surinamese</i> |                         |                                  |                         |                   |                                                                 |                                                       |                                                     |
| Men                       | 50 (3.5)                | 38 (2.7)                         | 288 (20.3)              | 124 (8.8)         | 137 (9.5)                                                       | 62 (4.3)                                              | 33 (2.3)                                            |
| Women                     | 47 (2.1)                | 41 (1.9)                         | 340 (15.1)              | 63 (2.8)          | 102 (4.5)                                                       | 16 (0.7)                                              | 94 (4.2)                                            |
| <i>Ghanaian</i>           |                         |                                  |                         |                   |                                                                 |                                                       |                                                     |
| Men                       | 40 (4.3)                | 11 (1.2)                         | 293 (35.5)              | 41 (5.4)          | 103 (12.9)                                                      | 22 (2.5)                                              | 9 (1.1)                                             |
| Women                     | 32 (2.7)                | 25 (2.1)                         | 266 (21.3)              | 42 (3.4)          | 79 (6.1)                                                        | 7 (0.6)                                               | 29 (2.5)                                            |
| <i>Turkish</i>            |                         |                                  |                         |                   |                                                                 |                                                       |                                                     |
| Men                       | 13 (0.9)                | 10 (0.7)                         | 87 (6.0)                | 89 (6.2)          | 55 (3.8)                                                        | 118 (8.2)                                             | 37 (2.5)                                            |
| Women                     | 11 (0.7)                | 7 (0.4)                          | 58 (3.3)                | 36 (2.0)          | 23 (1.3)                                                        | 23 (1.4)                                              | 69 (3.9)                                            |
| <i>Moroccan</i>           |                         |                                  |                         |                   |                                                                 |                                                       |                                                     |
| Men                       | 6 (0.4)                 | 8 (0.5)                          | 160 (11.5)              | 122 (9.1)         | 80 (5.3)                                                        | 111 (7.8)                                             | 14 (0.9)                                            |
| Women                     | 12 (0.6)                | 8 (0.4)                          | 108 (4.9)               | 74 (3.2)          | 46 (2.1)                                                        | 29 (1.3)                                              | 76 (3.6)                                            |

Data are reported in n (%). ECG, electrocardiogram.

<sup>a</sup> 110≤QRS<120ms; <sup>b</sup> men: QTc >450ms, women: QTc ≥460ms.

**Appendix Table 4b.** Age-adjusted prevalence of less common ECG abnormalities (for majors: prevalence <1% in total study population; for minors: abnormalities not in top 5 with highest prevalence in total study population), shown by major and minor ECG abnormality categories, by sex, ordered by highest to lowest overall prevalence

|                                                              | Men       | Women     |
|--------------------------------------------------------------|-----------|-----------|
| <b>Major ECG abnormalities</b>                               |           |           |
| Microvoltages                                                | 38 (0.5)  | 138 (1.2) |
| Right bundle branch block (RBBB)                             | 117 (1.4) | 38 (0.3)  |
| Severely prolonged QTc (Bazett) interval <sup>a</sup>        | 59 (0.7)  | 91 (0.8)  |
| Nonspecific ventricular conduction disturbances <sup>b</sup> | 87 (1.1)  | 10 (0.1)  |
| Pathological Q waves                                         | 50 (0.6)  | 32 (0.3)  |
| Left bundle branch block (LBBB)                              | 20 (0.2)  | 36 (0.3)  |
| Ventricular preexcitation                                    | 27 (0.3)  | 16 (0.1)  |
| Extreme axis deviation                                       | 15 (0.2)  | 7 (0.06)  |
| Atrial fibrillation or flutter                               | 8 (0.1)   | 5 (0.05)  |
| Miscellaneous <sup>c</sup>                                   | 7 (0.08)  | 2 (0.02)  |
| Severely shortened QTc (Bazett) interval <sup>d</sup>        | 3 (0.04)  | 2 (0.02)  |
| Ventricular rhythm                                           | 2 (0.02)  | 1 (0.01)  |
| 2nd degree atrioventricular conduction disturbances          | 3 (0.04)  | 0         |
| Sinus bradycardia + idioventricular rhythm                   | 2 (0.02)  | 0         |
| 3rd degree atrioventricular conduction disturbances          | 0         | 0         |
| <b>Minor ECG abnormalities</b>                               |           |           |
| Left axis deviation                                          | 371 (4.5) | 207 (1.9) |
| Right axis deviation                                         | 222 (2.8) | 120 (1.1) |
| Possible pathological Q waves                                | 172 (2.1) | 111 (1.0) |
| Frequent PACs and/or PVCs                                    | 99 (1.2)  | 118 (1.1) |
| Atrial rhythm                                                | 79 (1.0)  | 130 (1.1) |
| Mildly shortened QTc (Bazett) interval <sup>e</sup>          | 1.7 (1.4) | 100 (0.9) |

|                                       | Men      | Women    |
|---------------------------------------|----------|----------|
| Left anterior fascicular block (LAFB) | 61 (0.7) | 32 (0.3) |
| Sinus tachycardia                     | 23 (0.3) | 37 (0.3) |
| Atrial abnormalities                  | 32 (0.4) | 27 (0.2) |
| Indeterminate heart axis              | 9 (0.1)  | 4 (0.03) |

Data are reported in n (%).

ECG, electrocardiogram; PAC, premature atrial contraction; PVC, premature ventricular contraction.

<sup>a</sup> men: QTc >470ms, women: QTc ≥480ms;

<sup>b</sup> QRS duration ≥120ms.

<sup>c</sup> Including ECG suggestive of Brugada syndrome.

<sup>d</sup> men: QTc <330ms, women: QTc <340ms.

<sup>e</sup> men: QTc <360ms, women: QTc <370ms
